# Supplementary material for: Age of First Breeding Interacts with Pre- and Post-Recruitment Experience in Shaping Breeding Phenology in a Long-Lived Gull
Source: PLoS One. 2013 Dec 4;8(12):e82093. doi: 10.1371/journal.pone.0082093 (PMC3852959; doi:10.1371/journal.pone.0082093)
Supplement: Appendix S1 — Analyzed datasets. (XLSX) [file pone.0082093.s001.xlsx]

## Sheet: table 1 upper left panel
identity	pair	year	age	arrival date	ageclass
AAAX	A7	3	2	215	2
AAAX	A7	4	3	146	3
AAAX	A7	5	4	144	4
AAAZ	A8	2	1	176	1
AAAZ	A8	4	3	132	3
AAAZ	A8	5	4	96	4
AAAZ	A8	6	5	109	5
AAAZ	A8	7	6	107	6
AAAZ	A8	8	7	120	7
AAAZ	A8	9	8	147	8
AAAZ	A8	10	9	104	9
ABAD	A9	4	3	161	3
ABAD	A9	6	5	144	5
ABAD	A9	7	6	127	6
ABAD	A9	8	7	120	7
ABAJ	A10	3	2	140	2
ABAJ	A10	4	3	151	3
ABAJ	A10	5	4	134	4
ABAJ	A10	6	5	116	5
ABAJ	A10	7	6	79	6
ABAJ	A10	8	7	132	7
ABAJ	A10	9	8	126	8
ABAJ	A10	10	9	90	9
ABAJ	A10	11	10	200	10
ABAJ	A10	12	11	93	11
ABAJ	A10	13	12	182	12
ABAR	A11	3	2	166	2
ABAR	A11	4	3	146	3
ABAR	A11	5	4	137	4
ABAR	A11	6	5	116	5
ABAR	A11	7	6	134	6
ABAR	A11	8	7	120	7
ABAR	A11	9	8	125	8
ABAR	A11	10	9	122	9
ABAR	A11	11	10	109	10
ABAR	A11	12	11	113	11
ABAZ	A12	3	2	201	2
ABAZ	A12	4	3	146	3
ABAZ	A12	5	4	141	4
ABAZ	A12	8	7	118	7
ABAZ	A12	9	8	147	8
ACAJ	A13	3	2	166	2
ACAJ	A13	4	3	165	3
ACAJ	A13	5	4	159	4
ACAJ	A13	6	5	123	5
ACAJ	A13	7	6	114	6
ACAJ	A13	8	7	120	7
ACAJ	A13	9	8	98	8
ACAL	A14	3	2	199	2
ACAL	A14	4	3	104	3
ACAL	A14	5	4	96	4
ACAL	A14	6	5	109	5
ADAF	A15	3	2	166	2
ADAF	A15	4	3	156	3
ADAF	A15	5	4	157	4
ADAF	A15	6	5	137	5
ADAF	A15	7	6	127	6
ADAF	A15	8	7	120	7
ADAF	A15	9	8	125	8
ADAF	A15	10	9	118	9
ADAF	A15	11	10	114	10
ADAF	A15	13	12	114	12
ADAF	A15	14	13	141	13
ADAV	A16	3	2	180	2
ADAV	A16	5	4	135	4
ADAV	A16	6	5	116	5
ADAW	A17	3	2	199	2
ADAW	A17	4	3	139	3
ADAW	A17	5	4	180	4
ADAW	A17	6	5	130	5
AFAF	A18	4	3	161	3
AFAF	A18	5	4	144	4
AFAF	A18	6	5	137	5
AFAF	A18	7	6	133	6
AFAF	A18	8	7	141	7
AFAN	A19	3	2	126	2
AFAN	A19	4	3	111	3
AFAN	A19	5	4	135	4
AFAN	A19	6	5	123	5
AFAN	A19	7	6	114	6
AFAN	A19	8	7	78	7
AFAN	A19	9	8	96	8
AFAP	A20	3	2	203	2
AFAP	A20	4	3	153	3
AFAP	A20	5	4	144	4
AFAP	A20	6	5	109	5
AFAP	A20	7	6	111	6
AFAP	A20	8	7	120	7
AFAP	A20	9	8	117	8
AFAP	A20	11	10	186	10
AFAP	A20	13	12	149	12
AFAP	A20	14	13	194	13
AFAR	A21	6	5	207	5
AFAR	A21	7	6	142	6
AFAR	A21	8	7	141	7
AFAR	A21	9	8	138	8
AFAR	A21	10	9	146	9
AFAR	A21	11	10	143	10
AFAR	A21	13	12	142	12
AFAR	A21	14	13	155	13
AFAS	A22	3	2	206	2
AFAS	A22	4	3	118	3
AFAS	A22	5	4	82	4
AFAS	A22	6	5	109	5
AFAS	A22	7	6	118	6
AFAS	A22	8	7	141	7
AFAS	A22	9	8	117	8
AFAS	A22	10	9	111	9
AFAS	A22	11	10	99	10
AFAS	A22	12	11	120	11
AFAS	A22	13	12	135	12
AFAS	A22	14	13	148	13
AFAW	A23	3	2	201	2
AFAW	A23	4	3	153	3
AFAW	A23	5	4	135	4
AFAW	A23	6	5	116	5
AFAW	A23	7	6	107	6
AFAW	A23	8	7	106	7
AFAW	A23	9	8	147	8
AGAB	A24	4	3	161	3
AGAB	A24	5	4	19	4
AGAB	A24	6	5	102	5
AGAB	A24	7	6	79	6
AGAG	A25	4	3	207	3
AGAG	A25	5	4	137	4
AGAG	A25	6	5	130	5
AGAG	A25	7	6	134	6
AGAG	A25	8	7	120	7
AGAG	A25	9	8	147	8
AGAG	A25	10	9	159	9
AGAG	A25	11	10	116	10
AGAG	A25	12	11	114	11
AGAG	A25	13	12	133	12
AGAG	A25	14	13	118	13
AGAH	A26	3	2	180	2
AGAH	A26	4	3	132	3
AGAH	A26	5	4	141	4
AGAH	A26	6	5	144	5
AHAH	A27	4	3	111	3
AHAH	A27	5	4	137	4
AHAH	A27	6	5	116	5
AHAJ	A28	3	2	164	2
AHAJ	A28	4	3	139	3
AHAJ	A28	5	4	141	4
AHAJ	A28	6	5	142	5
AHAJ	A28	7	6	140	6
AHAL	A29	3	2	166	2
AHAL	A29	4	3	158	3
AHAL	A29	5	4	144	4
AHAL	A29	6	5	130	5
AHAL	A29	7	6	128	6
AHAL	A29	8	7	155	7
AHAS	A30	3	2	145	2
AHAS	A30	4	3	149	3
AHAS	A30	5	4	159	4
AHAS	A30	6	5	137	5
AHAS	A30	7	6	149	6
AHAS	A30	8	7	132	7
AHAS	A30	9	8	152	8
AHAS	A30	10	9	125	9
AHAS	A30	11	10	116	10
AHAS	A30	13	12	114	12
AHAW	A31	3	2	194	2
AHAW	A31	4	3	151	3
AHAW	A31	5	4	131	4
AHAW	A31	6	5	130	5
AHAW	A31	7	6	118	6
AHAW	A31	8	7	159	7
AHAW	A31	9	8	147	8
AHAZ	A32	3	2	201	2
AHAZ	A32	4	3	160	3
AHAZ	A32	5	4	157	4
AHAZ	A32	6	5	149	5
AHAZ	A32	7	6	142	6
AHAZ	A32	8	7	153	7
AJAA	A33	3	2	180	2
AJAA	A33	4	3	165	3
AJAA	A33	6	5	137	5
AJAA	A33	7	6	135	6
AJAA	A33	8	7	132	7
AJAA	A33	9	8	167	8
AJAA	A33	10	9	132	9
AJAA	A33	11	10	129	10
AJAA	A33	12	11	197	11
AJAA	A33	13	12	149	12
AJAA	A33	14	13	141	13
AJAD	A34	4	3	144	3
AJAD	A34	5	4	137	4
AJAD	A34	6	5	123	5
AJAD	A34	7	6	111	6
AJAD	A34	8	7	120	7
AJAD	A34	9	8	105	8
AJAD	A34	10	9	118	9
AJAH	A35	4	3	149	3
AJAH	A35	6	5	116	5
AJAH	A35	7	6	127	6
AJAH	A35	8	7	120	7
AJAJ	A36	3	2	194	2
AJAJ	A36	4	3	146	3
AJAJ	A36	5	4	144	4
AJAJ	A36	6	5	130	5
AJAJ	A36	9	8	201	8
AJAJ	A36	10	9	125	9
AJAJ	A36	11	10	116	10
AJAJ	A36	12	11	115	11
AJAJ	A36	13	12	142	12
AJAJ	A36	14	13	148	13
AJAK	A37	3	2	147	2
AJAK	A37	4	3	139	3
AJAK	A37	5	4	137	4
AJAK	A37	6	5	151	5
AJAK	A37	7	6	125	6
AJAK	A37	8	7	141	7
AJAK	A37	9	8	125	8
AJAK	A37	10	9	102	9
ALAJ	A38	6	5	156	5
ALAK	A39	3	2	201	2
ALAK	A39	4	3	160	3
ALAK	A39	5	4	144	4
ALAK	A39	6	5	109	5
ALAK	A39	7	6	107	6
ALAK	A39	8	7	85	7
ALAK	A39	9	8	98	8
ALAK	A39	11	10	102	10
ALAK	A39	12	11	168	11
ALAK	A39	13	12	156	12
ALAK	A39	14	13	113	13
ALAP	A40	3	2	168	2
ALAP	A40	4	3	172	3
ALAP	A40	5	4	137	4
ALAP	A40	6	5	123	5
ALAP	A40	7	6	114	6
ALAP	A40	8	7	139	7
AMAD	A41	4	3	181	3
AMAD	A41	5	4	143	4
AMAD	A41	6	5	156	5
AMAD	A41	7	6	114	6
AMAD	A41	8	7	141	7
AMAD	A41	9	8	105	8
AMAD	A41	10	9	123	9
AMAK	A42	3	2	119	2
AMAK	A42	4	3	151	3
AMAK	A42	5	4	144	4
AMAK	A42	6	5	116	5
AMAK	A42	7	6	127	6
AMAK	A42	8	7	139	7
AMAK	A42	9	8	126	8
AMAK	A42	10	9	132	9
AMAK	A42	11	10	102	10
AMAL	A43	3	2	173	2
AMAL	A43	4	3	151	3
AMAL	A43	5	4	137	4
AMAL	A43	6	5	130	5
AMAL	A43	7	6	149	6
AMAL	A43	8	7	127	7
AMAL	A43	9	8	126	8
AMAL	A43	10	9	111	9
AMAL	A43	11	10	129	10
AMAL	A43	12	11	114	11
AMAL	A43	13	12	114	12
AMAL	A43	14	13	104	13
AMAX	A44	3	2	14	2
AMAX	A44	4	3	104	3
AMAX	A44	5	4	135	4
AMAX	A44	6	5	116	5
AMAX	A44	7	6	100	6
AMAX	A44	8	7	132	7
AMAX	A44	9	8	103	8
AMAX	A44	10	9	116	9
AMAX	A44	11	10	102	10
AMAX	A44	12	11	86	11
ANAB	A45	3	2	182	2
ANAB	A45	4	3	132	3
ANAB	A45	5	4	141	4
ANAB	A45	6	5	109	5
ANAB	A45	7	6	111	6
ANAB	A45	8	7	99	7
ANAB	A45	10	9	104	9
ANAB	A45	11	10	151	10
ANAB	A45	12	11	127	11
ANAD	A46	8	7	118	7
ANAD	A46	9	8	161	8
ANAN	A47	3	2	215	2
ANAN	A47	4	3	153	3
ANAN	A47	5	4	134	4
ANAN	A47	6	5	116	5
ANAN	A47	7	6	121	6
ANAN	A47	8	7	120	7
ANAN	A47	9	8	98	8
ANAN	A47	10	9	71	9
ANAN	A47	11	10	102	10
ANAN	A47	12	11	94	11
ANAN	A47	13	12	149	12
ANAN	A47	14	13	113	13
ANAS	A48	4	3	153	3
ANAS	A48	5	4	141	4
ANAS	A48	6	5	102	5
ANAS	A48	7	6	65	6
ANAS	A48	8	7	78	7
ANAS	A48	9	8	77	8
ANAW	A49	3	2	147	2
ANAW	A49	4	3	146	3
ANAW	A49	5	4	135	4
ANAW	A49	6	5	130	5
APAH	A50	3	2	175	2
APAH	A50	4	3	139	3
APAH	A50	5	4	134	4
APAU	A51	3	2	166	2
APAU	A51	4	3	146	3
APAU	A51	5	4	141	4
APAU	A51	6	5	137	5
APAU	A51	7	6	118	6
ARAH	A52	3	2	196	2
ARAH	A52	4	3	160	3
ARAH	A52	6	5	144	5
ARAH	A52	7	6	156	6
ARAH	A52	8	7	159	7
ARAH	A52	9	8	140	8
ARAH	A52	10	9	136	9
AS1	A53	1	7	164	7
AS1	A53	2	8	93	8
ASAH	A54	3	2	182	2
ASAH	A54	4	3	149	3
ASAH	A54	5	4	135	4
ASAH	A54	6	5	130	5
ASAH	A54	7	6	128	6
ASAH	A54	8	7	120	7
ASAH	A54	9	8	147	8
ASAH	A54	10	9	146	9
ASAH	A54	11	10	129	10
ASAH	A54	12	11	115	11
ASAH	A54	13	12	135	12
ASAH	A54	14	13	134	13
ASAP	A55	3	2	194	2
ASAP	A55	4	3	149	3
ASAP	A55	5	4	135	4
ASAP	A55	6	5	130	5
ASAP	A55	7	6	114	6
ASAP	A55	8	7	120	7
ASAP	A55	9	8	117	8
ASAP	A55	10	9	122	9
ASAP	A55	11	10	123	10
ASAP	A55	12	11	115	11
ASAP	A55	13	12	128	12
ASAP	A55	14	13	120	13
ASAX	A56	3	2	182	2
ASAX	A56	4	3	146	3
ASAX	A56	5	4	137	4
ASAX	A56	6	5	137	5
ASAX	A56	7	6	135	6
ASAX	A56	8	7	139	7
ASAX	A56	9	8	131	8
ASAX	A56	10	9	125	9
ASAX	A56	11	10	109	10
ASAX	A56	12	11	114	11
ASAX	A56	13	12	146	12
ASAX	A56	14	13	134	13
ASAY	A57	3	2	166	2
ASAY	A57	4	3	158	3
ASAY	A57	5	4	141	4
ASAY	A57	6	5	137	5
ASAY	A57	7	6	121	6
ASAY	A57	8	7	120	7
ASAY	A57	9	8	131	8
ASAY	A57	10	9	125	9
ASAY	A57	11	10	135	10
ASAY	A57	12	11	114	11
ASAY	A57	13	12	126	12
AUAA	A58	3	2	206	2
AUAA	A58	4	3	149	3
AUAA	A58	5	4	141	4
AUAA	A58	6	5	137	5
AUAA	A58	7	6	127	6
AUAA	A58	8	7	127	7
AUAP	A59	3	2	187	2
AUAP	A59	4	3	146	3
AUAP	A59	5	4	141	4
AUAP	A59	6	5	130	5
AUAP	A59	7	6	135	6
AUAP	A59	8	7	120	7
AUAP	A59	9	8	145	8
AUAP	A59	10	9	125	9
AUAP	A59	11	10	129	10
AUAP	A59	12	11	108	11
AUAP	A59	13	12	112	12
AUAP	A59	14	13	132	13
AUAV	A60	2	1	129	1
AUAV	A60	4	3	177	3
AUAV	A60	5	4	137	4
AUAV	A60	6	5	102	5
AUAV	A60	7	6	107	6
AUAV	A60	8	7	120	7
AUAV	A60	9	8	105	8
AUAV	A60	10	9	97	9
AUAV	A60	11	10	100	10
AUAV	A60	12	11	94	11
AWAF	A61	4	3	174	3
AWAF	A61	5	4	145	4
AWAF	A61	6	5	137	5
AWAF	A61	7	6	133	6
AWAF	A61	8	7	132	7
AWAF	A61	9	8	126	8
AWAN	A62	4	3	207	3
AWAN	A62	5	4	141	4
AWAN	A62	6	5	130	5
AWAN	A62	7	6	127	6
AWAN	A62	8	7	125	7
AWAN	A62	9	8	117	8
AWAR	A63	3	2	173	2
AWAR	A63	4	3	139	3
AWAR	A63	5	4	137	4
AWAR	A63	8	7	182	7
AWAR	A63	9	8	96	8
AWAR	A63	10	9	83	9
AWAR	A63	11	10	113	10
AWAR	A63	12	11	94	11
AWAR	A63	13	12	112	12
AWAR	A63	14	13	120	13
AWAU	A64	3	2	166	2
AWAU	A64	4	3	146	3
AWAU	A64	5	4	153	4
AWAU	A64	6	5	137	5
AWAU	A64	7	6	134	6
AWAU	A64	8	7	173	7
AXAG	A65	4	3	139	3
AXAG	A65	5	4	135	4
AXAG	A65	6	5	116	5
AXAG	A65	7	6	107	6
AXAG	A65	8	7	118	7
BAAG	A66	3	2	192	2
BAAG	A66	4	3	146	3
BAAG	A66	5	4	137	4
BAAG	A66	6	5	130	5
BAAG	A66	7	6	121	6
BAAK	A67	3	2	166	2
BAAK	A67	4	3	156	3
BAAK	A67	5	4	137	4
BAAK	A67	6	5	102	5
BAAK	A67	7	6	107	6
BAAK	A67	8	7	15	7
BAAK	A67	9	8	84	8
BAAK	A67	10	9	97	9
BAAK	A67	11	10	102	10
BAAK	A67	12	11	94	11
BBAB	A68	4	3	125	3
BBAB	A68	5	4	141	4
BBAB	A68	6	5	116	5
BBAB	A68	7	6	100	6
BBAB	A68	8	7	97	7
BBAB	A68	9	8	96	8
BBAB	A68	10	9	116	9
BBAF	A69	5	4	153	4
BBAF	A69	6	5	137	5
BBAF	A69	7	6	128	6
BBAF	A69	8	7	168	7
BBAF	A69	9	8	140	8
BBAF	A69	10	9	129	9
BBAF	A69	11	10	121	10
BBAF	A69	12	11	166	11
BBAF	A69	13	12	133	12
BBAF	A69	14	13	132	13
BBAT	A70	4	3	167	3
BBAT	A70	5	4	141	4
BBAT	A70	6	5	116	5
BBAT	A70	7	6	121	6
BBAT	A70	8	7	99	7
BBAT	A70	9	8	145	8
BBAT	A70	10	9	104	9
BBAX	A1	6	5	123	5
BBAX	A1	7	6	111	6
BBAX	A1	8	7	141	7
BBAX	A1	9	8	112	8
BBAX	A1	10	9	102	9
BBAX	A1	11	10	116	10
BBAX	A1	12	11	86	11
BBAX	A1	13	12	114	12
BBAY	A71	4	3	177	3
BBAY	A71	5	4	143	4
BBAY	A71	6	5	142	5
BBAY	A71	7	6	128	6
BCAR	A72	3	2	216	2
BCAR	A72	4	3	153	3
BDAN	A73	4	3	151	3
BDAN	A73	5	4	135	4
BDAN	A73	6	5	123	5
BDAN	A73	7	6	121	6
BDAN	A73	8	7	139	7
BDAN	A73	9	8	145	8
BDAN	A73	10	9	104	9
BDAN	A73	11	10	106	10
BDAN	A73	12	11	92	11
BDAN	A73	13	12	126	12
BDAP	A74	3	2	185	2
BDAP	A74	4	3	140	3
BDAP	A74	5	4	135	4
BDAP	A74	6	5	123	5
BDAP	A74	7	6	107	6
BDAP	A74	8	7	132	7
BDAU	A75	3	2	220	2
BDAU	A75	4	3	146	3
BDAU	A75	5	4	135	4
BDAU	A75	6	5	123	5
BDAU	A75	7	6	118	6
BJAA	A76	3	2	203	2
BJAA	A76	4	3	173	3
BJAA	A76	5	4	144	4
BJAA	A76	6	5	130	5
BJAA	A76	7	6	128	6
BJAA	A76	8	7	120	7
BJAA	A76	9	8	147	8
BJAA	A76	10	9	167	9
BJAA	A76	11	10	113	10
BJAA	A76	12	11	114	11
BJAA	A76	13	12	126	12
BJAA	A76	14	13	132	13
BJAZ	A77	3	2	182	2
BJAZ	A77	4	3	149	3
BJAZ	A77	6	5	130	5
BJAZ	A77	7	6	121	6
BJAZ	A77	8	7	120	7
BJAZ	A77	9	8	145	8
BJAZ	A77	10	9	137	9
BKAA	A78	3	2	194	2
BKAA	A78	4	3	149	3
BKAA	A78	5	4	137	4
BKAN	A79	4	3	165	3
BKAN	A79	5	4	137	4
BKAN	A79	6	5	123	5
BKAX	A80	3	2	192	2
BKAX	A80	4	3	151	3
BKAX	A80	5	4	141	4
BKAX	A80	6	5	127	5
BKAX	A80	7	6	114	6
BLAD	A81	3	2	216	2
BLAD	A81	4	3	149	3
BLAD	A81	5	4	137	4
BLAD	A81	6	5	116	5
BLAD	A81	7	6	135	6
BLAD	A81	8	7	120	7
BLAD	A81	9	8	125	8
BLAD	A81	10	9	109	9
BLAD	A81	11	10	109	10
BLAD	A81	12	11	114	11
BLAD	A81	13	12	128	12
BLAD	A81	14	13	120	13
BLAH	A2	3	2	178	2
BLAH	A2	4	3	161	3
BLAH	A2	5	4	141	4
BLAH	A2	6	5	156	5
BLAH	A2	7	6	121	6
BLAH	A2	8	7	120	7
BLAH	A2	9	8	126	8
BLAH	A2	10	9	111	9
BLAH	A2	11	10	116	10
BLAN	A82	3	2	201	2
BLAN	A82	4	3	167	3
BLAN	A82	7	6	156	6
BLAR	A83	4	3	165	3
BLAR	A83	5	4	143	4
BLAR	A83	6	5	149	5
BLAR	A83	7	6	134	6
BLAR	A83	8	7	139	7
BLAR	A83	9	8	138	8
BLAR	A83	10	9	125	9
BLAR	A83	11	10	135	10
BLAR	A83	12	11	122	11
BLAR	A83	13	12	125	12
BLAR	A83	14	13	120	13
BMAA	A84	4	3	125	3
BMAA	A84	5	4	135	4
BMAA	A84	6	5	130	5
BMAN	A85	4	3	205	3
BMAN	A85	5	4	137	4
BMAN	A85	6	5	137	5
BMAN	A85	7	6	121	6
BMAN	A85	8	7	132	7
BMAN	A85	9	8	138	8
BMAN	A85	10	9	123	9
BMAN	A85	11	10	116	10
BMAN	A85	12	11	120	11
BMAN	A85	13	12	128	12
BMAN	A85	14	13	127	13
BMAT	A86	3	2	192	2
BMAT	A86	5	4	144	4
BMAT	A86	6	5	149	5
BMAT	A86	7	6	125	6
BMAT	A86	8	7	125	7
BMAT	A86	9	8	105	8
BNAC	A87	3	2	196	2
BNAC	A87	4	3	146	3
BNAC	A87	5	4	141	4
BNAC	A87	6	5	116	5
BNAC	A87	7	6	111	6
BNAC	A87	8	7	104	7
BNAC	A87	9	8	98	8
BNAH	A88	3	2	194	2
BNAH	A88	4	3	178	3
BNAH	A88	5	4	144	4
BNAH	A88	6	5	130	5
BNAH	A88	7	6	121	6
BNAH	A88	8	7	160	7
BNAH	A88	9	8	167	8
BNAH	A88	10	9	153	9
BNAH	A88	11	10	163	10
BNAH	A88	13	12	182	12
BNAH	A88	14	13	182	13
BNAR	A89	3	2	187	2
BNAR	A89	4	3	186	3
BNAR	A89	5	4	137	4
BNAR	A89	6	5	123	5
BNAR	A89	7	6	121	6
BNAR	A89	8	7	155	7
BNAR	A89	9	8	131	8
BNAR	A89	10	9	136	9
BNAT	A90	3	2	166	2
BNAT	A90	4	3	146	3
BNAT	A90	5	4	137	4
BNAT	A90	6	5	130	5
BPAL	A91	3	2	164	2
BPAL	A91	4	3	146	3
BPAL	A91	5	4	137	4
BPAL	A91	6	5	149	5
BPAL	A91	7	6	134	6
BPAZ	A92	4	3	144	3
BPAZ	A92	5	4	141	4
BPAZ	A92	6	5	142	5
BSAL	A93	3	2	168	2
BSAL	A93	4	3	156	3
BSAL	A93	5	4	144	4
BSAL	A93	6	5	144	5
BSAL	A93	7	6	114	6
BSAL	A93	8	7	106	7
BSAL	A93	9	8	98	8
BSAL	A93	10	9	132	9
BSAL	A93	11	10	113	10
BSAL	A93	12	11	66	11
BSAL	A93	13	12	105	12
BSAL	A93	14	13	127	13
BSAT	A94	2	1	170	1
BSAT	A94	4	3	179	3
BSAT	A94	5	4	135	4
BSAT	A94	6	5	130	5
BSAT	A94	7	6	125	6
BSAT	A94	8	7	120	7
BSAT	A94	9	8	126	8
BSAT	A94	10	9	118	9
BSAT	A94	11	10	186	10
BSAT	A94	12	11	127	11
BSAW	A3	4	3	149	3
BSAW	A3	5	4	137	4
BSAW	A3	6	5	191	5
BSAW	A3	7	6	114	6
BSAW	A3	8	7	131	7
BSAW	A3	9	8	98	8
BSAY	A95	4	3	149	3
BSAY	A95	5	4	137	4
BSAY	A95	6	5	116	5
BSAY	A95	7	6	107	6
BSAY	A95	8	7	120	7
BSAY	A95	9	8	105	8
BSAY	A95	10	9	102	9
BSAY	A95	11	10	113	10
BSAY	A95	12	11	115	11
BSAY	A95	13	12	142	12
BSAY	A95	14	13	141	13
BTAF	A96	4	3	153	3
BTAF	A96	5	4	134	4
BTAF	A96	6	5	142	5
BTAF	A96	7	6	125	6
BTAF	A96	8	7	131	7
BTAF	A96	9	8	125	8
BTAF	A96	10	9	125	9
BTAF	A96	11	10	123	10
BTAF	A96	12	11	122	11
BTAF	A96	13	12	121	12
BTAF	A96	14	13	120	13
BTAG	A97	3	2	171	2
BTAG	A97	4	3	153	3
BTAG	A97	7	6	142	6
BTAG	A97	8	7	120	7
BTAG	A97	9	8	126	8
BTAG	A97	12	11	127	11
BTAG	A97	13	12	156	12
BTAG	A97	14	13	155	13
BTAX	A98	4	3	160	3
BTAX	A98	5	4	137	4
BTAX	A98	6	5	137	5
BTAX	A98	7	6	121	6
BTAX	A98	8	7	120	7
BTAX	A98	9	8	133	8
BTAX	A98	10	9	118	9
BTAX	A98	11	10	113	10
BTAX	A98	12	11	108	11
BTAX	A98	13	12	128	12
BTAX	A98	14	13	113	13
CDAL	A99	11	8	184	8
CDAL	A99	12	9	115	9
CDAL	A99	13	10	135	10
CDAL	A99	14	11	127	11
CDAP	A100	11	5	185	5
CDAP	A100	12	6	107	6
CDAP	A100	13	7	182	7
DAAA	A101	8	6	197	6
DAAA	A101	9	7	110	7
DAAA	A101	10	8	102	8
DAAA	A101	11	9	99	9
DAAA	A101	12	10	86	10
DAAA	A101	13	11	135	11
DAAA	A101	14	12	104	12
DAAN	A102	8	5	194	5
DAAN	A102	9	6	125	6
DAAN	A102	10	7	83	7
DAAN	A102	11	8	88	8
DAAN	A102	12	9	134	9
DAAV	A3	8	5	190	5
DAAV	A3	9	6	96	6
DAAV	A3	10	7	90	7
DAAV	A3	11	8	114	8
DAAV	A3	12	9	106	9
DAAV	A3	13	10	105	10
DAAV	A3	14	11	104	11
DBAC	A103	8	5	189	5
DBAJ	A104	8	5	190	5
DBAJ	A104	9	6	126	6
DBAJ	A104	10	7	115	7
DBAJ	A104	11	8	116	8
DBAK	A105	8	5	194	5
DBAK	A105	9	6	119	6
DBAK	A105	10	7	115	7
DBAK	A105	11	8	149	8
DBAK	A105	12	9	120	9
DBAK	A105	13	10	142	10
DBAK	A105	14	11	148	11
DBAN	A106	8	5	203	5
DBAN	A106	9	6	126	6
DBAN	A106	10	7	102	7
DBAN	A106	11	8	99	8
DBAN	A106	12	9	115	9
DBAN	A106	13	10	128	10
DBAN	A106	14	11	134	11
DCAZ	A107	8	5	197	5
DCAZ	A107	9	6	125	6
DCAZ	A107	10	7	115	7
DCAZ	A107	11	8	107	8
DCAZ	A107	12	9	93	9
DCAZ	A107	13	10	114	10
DCAZ	A107	14	11	104	11
DDAB	A108	8	5	194	5
DDAB	A108	9	6	125	6
DDAB	A108	10	7	137	7
DDAB	A108	11	8	123	8
DDAB	A108	12	9	168	9
DDAB	A108	13	10	128	10
DDAB	A108	14	11	134	11
DDAD	A109	8	5	194	5
DDAD	A109	9	6	125	6
DDAD	A109	10	7	109	7
DDAJ	A110	9	6	138	6
DFAF	A111	11	3	213	3
DFAF	A111	12	4	126	4
DFAF	A111	13	5	126	5
DFAF	A111	14	6	125	6
DFAP	A112	12	4	149	4
DFAP	A112	13	5	155	5
DFAP	A112	14	6	195	6
DHAD	A4	8	5	182	5
DHAD	A4	9	6	147	6
DHAD	A4	10	7	137	7
DHAD	A4	11	8	137	8
DHAF	A113	8	5	187	5
DHAF	A113	9	6	125	6
DHAF	A113	10	7	109	7
DJAY	A114	9	5	147	5
DJAY	A114	10	6	167	6
DJAY	A114	11	7	116	7
DJAY	A114	12	8	157	8
DJAY	A114	14	10	113	10
DKAW	A115	9	6	131	6
DKAW	A115	10	7	118	7
DKAW	A115	11	8	129	8
DKAW	A115	12	9	107	9
DKAW	A115	13	10	121	10
DKAW	A115	14	11	148	11
DKAX	A116	9	4	110	4
DLAV	A117	11	3	175	3
DLAV	A117	12	4	157	4
DMAC	A118	10	2	115	2
DMAC	A118	11	3	220	3
DMAC	A118	12	4	92	4
DMAC	A118	13	5	119	5
DMAJ	A119	11	3	141	3
DMAJ	A119	12	4	126	4
DMAJ	A119	13	5	126	5
DMAU	A120	11	3	143	3
DMAU	A120	13	5	128	5
DMAU	A120	14	6	134	6
DMAW	A121	11	3	156	3
DMAW	A121	12	4	157	4
DMAW	A121	13	5	135	5
DMAW	A121	14	6	155	6
DNAU	A122	11	3	219	3
DNAU	A122	13	5	114	5
DNAU	A122	14	6	113	6
DPAD	A123	13	5	126	5
DPAD	A123	14	6	111	6
DPAK	A124	11	3	205	3
DPAK	A124	13	5	156	5
DPAK	A124	14	6	194	6
DPAM	A125	10	2	153	2
DPAM	A125	11	3	143	3
DPAM	A125	12	4	115	4
DPAZ	A126	11	3	175	3
DPAZ	A126	12	4	120	4
DPAZ	A126	13	5	128	5
DPAZ	A126	14	6	120	6
DRAR	A127	12	4	160	4
DRAR	A127	13	5	147	5
DRAR	A127	14	6	153	6
DRAZ	A128	11	3	200	3
DRAZ	A128	12	4	141	4
DRAZ	A128	13	5	135	5
DSAJ	A129	10	2	123	2
DSAJ	A129	11	3	121	3
DSAJ	A129	12	4	106	4
DSAJ	A129	13	5	112	5
DSAJ	A129	14	6	83	6
DTAG	A130	12	4	129	4
DTAG	A130	13	5	126	5
DTAG	A130	14	6	151	6
DUAB	A131	11	3	127	3
DUAB	A131	12	4	66	4
DUAB	A131	13	5	105	5
DUAB	A131	14	6	104	6
DUAD	A132	10	2	214	2
DUAD	A132	12	4	183	4
DUAD	A132	13	5	147	5
DUAY	A133	12	4	133	4
DUAY	A133	13	5	119	5
DUAY	A133	14	6	132	6
DVAJ	A134	10	2	158	2
DVAJ	A134	11	3	143	3
DVAJ	A134	12	4	182	4
DVAJ	A134	13	5	128	5
DVAJ	A134	14	6	152	6
DVAL	A135	14	6	160	6
DVAP	A136	11	3	149	3
DVAP	A136	12	4	134	4
DVAP	A136	13	5	121	5
DVAP	A136	14	6	104	6
DVAU	A137	10	2	167	2
DVAU	A137	11	3	123	3
DVAU	A137	12	4	115	4
DVAU	A137	13	5	128	5
DVAU	A137	14	6	104	6
DVAY	A138	10	2	193	2
DVAY	A138	11	3	143	3
DVAY	A138	12	4	120	4
DVAY	A138	13	5	156	5
DVAY	A138	14	6	127	6
DWAJ	A139	9	1	194	1
DWAJ	A139	10	2	153	2
DWAJ	A139	11	3	123	3
DWAJ	A139	12	4	115	4
DWAJ	A139	13	5	142	5
DWAJ	A139	14	6	141	6
DWAR	A140	11	3	149	3
DWAR	A140	12	4	120	4
DWAR	A140	13	5	121	5
DWAS	A141	13	5	135	5
DWAS	A141	14	6	134	6
DWAY	A142	11	3	175	3
DWAY	A142	13	5	147	5
DWAY	A142	14	6	151	6
DXAS	A143	11	3	137	3
DXAS	A143	12	4	183	4
DXAT	A144	13	5	135	5
DXAT	A144	14	6	148	6
DXAU	A145	10	2	173	2
DXAU	A145	11	3	143	3
DXAU	A145	12	4	120	4
DXAU	A145	13	5	142	5
DXAU	A145	14	6	134	6
DXAX	A146	11	3	149	3
DXAX	A146	12	4	129	4
DXAX	A146	13	5	140	5
DXAX	A146	14	6	125	6
DYAC	A147	12	4	121	4
DYAC	A147	13	5	133	5
DYAC	A147	14	6	125	6
DYAG	A148	11	3	163	3
DYAG	A148	12	4	183	4
DYAG	A148	13	5	126	5
DYAG	A148	14	6	104	6
DYAR	A149	12	4	153	4
DYAR	A149	13	5	126	5
DYAR	A149	14	6	146	6
DZAK	A150	13	5	112	5
DZAM	A151	11	3	193	3
DZAM	A151	13	5	162	5
DZAM	A151	14	6	134	6
DZAX	A152	11	3	171	3
DZAX	A152	12	4	129	4
DZAX	A152	13	5	128	5
DZAX	A152	14	6	113	6
E089	A153	7	6	142	6
E089	A153	8	7	141	7
E089	A153	9	8	138	8
E089	A153	10	9	118	9
E089	A153	11	10	123	10
E089	A153	13	12	135	12
E089	A153	14	13	127	13
E373	A154	7	5	125	5
E373	A154	8	6	148	6
E373	A154	9	7	182	7
E373	A154	10	8	125	8
E373	A154	11	9	129	9
E523	A155	10	7	167	7
E523	A155	11	8	143	8
E523	A155	12	9	127	9
E523	A155	13	10	140	10
E523	A155	14	11	125	11
E720	A4	6	3	144	3
E720	A4	7	4	127	4
E720	A4	8	5	139	5
E720	A4	9	6	131	6
E720	A4	10	7	132	7
E720	A4	11	8	123	8
E720	A4	12	9	122	9
E720	A4	13	10	121	10
E720	A4	14	11	113	11
EA91	A156	4	6	193	6
EA91	A156	5	7	143	7
EA91	A156	6	8	116	8
EA91	A156	7	9	114	9
EA91	A156	8	10	104	10
EA91	A156	9	11	152	11
EA91	A156	10	12	116	12
EA91	A156	11	13	106	13
EL52	A157	2	4	114	4
EL52	A157	3	5	147	5
EL52	A157	4	6	111	6
EL52	A157	5	7	141	7
EL52	A157	6	8	102	8
EL52	A157	7	9	133	9
EL52	A157	8	10	92	10
EL52	A157	9	11	103	11
EL52	A157	10	12	123	12
EL52	A157	11	13	92	13
ES51	A5	1	3	129	3
ES51	A5	2	4	149	4
ES51	A5	3	5	126	5
ES51	A5	4	6	69	6
ES51	A5	5	7	54	7
ES51	A5	6	8	102	8
ES51	A5	7	9	134	9
ES51	A5	8	10	141	10
ES51	A5	9	11	63	11
ES51	A5	11	13	81	13
ET54	A6	3	5	119	5
ET54	A6	4	6	144	6
ET54	A6	7	9	147	9
ET54	A6	9	11	168	11
ET54	A6	10	12	185	12
ET54	A6	11	13	116	13
EU83	A158	8	9	127	9
EU83	A158	9	10	147	10
EU83	A158	10	11	116	11
EU83	A158	11	12	135	12
EU83	A158	12	13	107	13
EY16	A159	7	8	135	8
EY16	A159	8	9	127	9
EY16	A159	9	10	145	10
EY16	A159	10	11	136	11
EY16	A159	11	12	135	12
EY16	A159	12	13	122	13
GDAP	A160	13	4	170	4
GDAP	A160	14	5	134	5
GDAX	A161	11	2	200	2
GDAX	A161	13	4	135	4
GDAX	A161	14	5	113	5
GGAC	A162	13	4	126	4
GGAC	A162	14	5	146	5
GGAV	A163	11	2	213	2
GGAV	A163	12	3	121	3
GGAV	A163	13	4	126	4
GGAV	A163	14	5	132	5
GHAF	A164	9	8	202	8
GJAN	A165	9	5	200	5
GJAN	A165	10	6	111	6
GJAN	A165	11	7	99	7
GJAN	A165	12	8	115	8
GJAT	A166	11	3	158	3
GJAT	A166	13	5	140	5
GJAT	A166	14	6	132	6
GKAB	A167	11	3	143	3
GKAB	A167	13	5	156	5
GKAB	A167	14	6	120	6
GKAV	A168	13	5	121	5
GKAV	A168	14	6	146	6
GLAB	A5	9	6	203	6
GLAB	A5	11	8	165	8
GLAB	A5	13	10	182	10
GLAB	A5	14	11	187	11
GLAC	A169	11	3	151	3
GLAC	A169	12	4	183	4
GLAC	A169	13	5	149	5
GLAC	A169	14	6	120	6
GLAY	A170	9	7	207	7
GLAY	A170	10	8	144	8
GLAY	A170	11	9	135	9
GLAY	A170	12	10	115	10
GLAY	A170	13	11	135	11
GLAY	A170	14	12	113	12
GNAG	A171	12	3	149	3
GNAG	A171	13	4	133	4
GNAG	A171	14	5	125	5
GNAR	A172	12	3	141	3
GNAR	A172	13	4	128	4
GNAR	A172	14	5	120	5
GNAU	A173	13	4	156	4
GNAU	A173	14	5	141	5
GPAD	A174	12	3	143	3
GPAD	A174	13	4	161	4
GPAD	A174	14	5	146	5
GPAR	A175	12	3	142	3
GPAR	A175	13	4	126	4
GPAR	A175	14	5	132	5
GRAC	A176	13	4	140	4
GRAS	A177	13	4	154	4
GRAS	A177	14	5	118	5
GSAN	A178	13	4	121	4
GSAN	A178	14	5	118	5
GSAW	A179	12	3	160	3
GSAW	A179	13	4	140	4
GSAW	A179	14	5	132	5
GSAY	A180	12	3	166	3
GSAY	A180	13	4	160	4
GSAY	A180	14	5	146	5
GTAJ	A181	13	4	133	4
GTAJ	A181	14	5	148	5
GTAK	A182	12	3	156	3
GTAK	A182	13	4	126	4
GTAK	A182	14	5	146	5
GWAJ	A183	9	7	195	7
GWAJ	A183	10	8	90	8
GWAJ	A183	11	9	92	9
GWAJ	A183	12	10	86	10
GWAJ	A183	13	11	112	11
GWAJ	A183	14	12	111	12
GWAM	A184	9	4	189	4
GWAM	A184	10	5	118	5
GWAM	A184	11	6	123	6
GWAN	A185	9	6	194	6
GWAW	A186	9	6	195	6
GWAW	A186	10	7	102	7
GWAW	A186	11	8	88	8
GWAW	A186	12	9	101	9
GWAZ	A187	9	6	195	6
GWAZ	A187	10	7	90	7
GWAZ	A187	11	8	102	8
GZAW	A188	9	5	194	5
GZAW	A188	10	6	137	6
GZAW	A188	11	7	137	7
GZAW	A188	12	8	134	8
GZAW	A188	13	9	149	9
GZAW	A188	14	10	134	10
GZAZ	A2	9	6	195	6
GZAZ	A2	10	7	71	7
GZAZ	A2	11	8	92	8
GZAZ	A2	12	9	73	9
GZAZ	A2	13	10	176	10
GZAZ	A2	14	11	41	11
HAAJ	A189	13	3	133	3
HAAJ	A189	14	4	160	4
HAAP	A190	13	3	140	3
HAAP	A190	14	4	146	4
HCAP	A191	13	3	121	3
HCAP	A191	14	4	183	4
HCAR	A192	13	3	142	3
HCAR	A192	14	4	148	4
HCAT	A193	11	1	172	1
HCAT	A193	13	3	156	3
HCAT	A193	14	4	148	4
HCAU	A194	13	3	183	3
HCAU	A194	14	4	159	4
HDAG	A195	14	4	139	4
HFAA	A196	13	3	162	3
HFAA	A196	14	4	146	4
HFAR	A197	13	3	140	3
HFAR	A197	14	4	146	4
HGAU	A198	13	3	162	3
HGAU	A198	14	4	146	4
HHAD	A199	13	3	133	3
HJAB	A200	14	4	155	4
HJAM	A201	13	3	140	3
HJAM	A201	14	4	139	4
HKAH	A202	13	3	126	3
HKAH	A202	14	4	152	4
HKAP	A203	13	3	140	3
HKAP	A203	14	4	139	4
HKAT	A204	13	3	147	3
HKAT	A204	14	4	151	4
HKAX	A205	12	2	161	2
HKAX	A205	13	3	161	3
HKAX	A205	14	4	132	4
HLAP	A206	13	3	156	3
HLAP	A206	14	4	187	4
HLAU	A207	14	4	146	4
HMAL	A208	14	4	196	4
HMAT	A209	13	3	153	3
HNAF	A210	13	3	154	3
HNAF	A210	14	4	132	4
HNAG	A211	13	3	142	3
HNAG	A211	14	4	134	4
HNAT	A212	13	3	177	3
HNAT	A212	14	4	148	4
HPAJ	A213	13	3	128	3
HPAJ	A213	14	4	120	4
HRAA	A214	13	3	149	3
HRAA	A214	14	4	141	4
HRAS	A215	13	3	178	3
HSAJ	A216	14	4	134	4
HSAL	A217	13	3	176	3
HSAL	A217	14	4	141	4
HSAN	A218	13	3	140	3
HSAN	A218	14	4	125	4
HSAZ	A219	13	3	154	3
HSAZ	A219	14	4	155	4
HTAS	A220	13	3	168	3
HTAS	A220	14	4	132	4
HUAF	A221	13	3	146	3
HUAF	A221	14	4	134	4
HWAK	A222	11	5	178	5
HWAK	A222	12	6	115	6
HWAK	A222	13	7	121	7
HWAK	A222	14	8	134	8
HWAN	A223	11	8	170	8
HWAN	A223	12	9	114	9
HWAN	A223	13	10	121	10
HWAN	A223	14	11	113	11
HWAV	A224	11	7	178	7
HWAV	A224	12	8	107	8
HWAZ	A225	12	8	114	8
HWAZ	A225	13	9	135	9
HWAZ	A225	14	10	120	10
HYAR	A226	13	3	140	3
HYAR	A226	14	4	120	4
HZAB	A227	13	3	146	3
HZAB	A227	14	4	111	4
HZAD	A228	13	3	119	3
HZAD	A228	14	4	120	4
HZAK	A229	14	4	104	4
HZAS	A230	12	2	141	2
HZAS	A230	13	3	114	3
HZAS	A230	14	4	148	4
HZAV	A231	13	3	146	3
HZAV	A231	14	4	166	4
KCAR	A232	10	8	173	8
KCAR	A232	11	9	116	9
KCAR	A232	12	10	122	10
KCAS	A233	10	4	173	4
KCAS	A233	11	5	102	5
KCAS	A233	12	6	114	6
KCAV	A234	10	4	179	4
KCAV	A234	11	5	123	5
KCAV	A234	12	6	120	6
KCAV	A234	13	7	128	7
KCAV	A234	14	8	120	8
KCAZ	A235	10	6	186	6
KCAZ	A235	11	7	113	7
KCAZ	A235	12	8	94	8
KCAZ	A235	13	9	128	9
KCAZ	A235	14	10	134	10
KFAJ	A236	10	5	193	5
KGAD	A237	10	6	186	6
KGAD	A237	11	7	116	7
KGAD	A237	12	8	127	8
KGAH	A238	10	5	187	5
KGAH	A238	11	6	102	6
KGAH	A238	12	7	122	7
KGAH	A238	14	9	182	9
KGAT	A239	10	5	187	5
KGAT	A239	11	6	113	6
KGAT	A239	12	7	80	7
KGAT	A239	13	8	156	8
KGAT	A239	14	9	113	9
KGAW	A240	10	9	187	9
KGAW	A240	11	10	102	10
KGAW	A240	12	11	87	11
KGAW	A240	13	12	114	12
KGAW	A240	14	13	113	13
KJAJ	A241	14	4	148	4
KJAZ	A242	13	3	177	3
KJAZ	A242	14	4	120	4
KKAU	A1	10	7	193	7
KKAU	A1	11	8	116	8
KKAU	A1	12	9	115	9
KKAU	A1	13	10	121	10
KKAU	A1	14	11	120	11
KWAD	A243	11	5	178	5
KYAF	A244	11	5	170	5
KYAL	A245	11	7	185	7
KYAL	A245	12	8	114	8
KYAL	A245	13	9	121	9
KYAL	A245	14	10	120	10
KYAU	A246	11	6	170	6
KYAU	A246	13	8	135	8
KYAU	A246	14	9	134	9
KZAH	A6	11	5	178	5
KZAH	A6	12	6	115	6
KZAH	A6	13	7	121	7
KZAH	A6	14	8	139	8
KZAL	A247	11	4	184	4
KZAL	A247	12	5	120	5
KZAL	A247	13	6	112	6
KZAL	A247	14	7	125	7
KZAM	A248	11	7	185	7
KZAM	A248	12	8	122	8
KZAM	A248	13	9	105	9
KZAM	A248	14	10	139	10
KZAR	A249	11	5	185	5
LBAD	A250	11	8	185	8
LBAD	A250	12	9	107	9
LBAD	A250	13	10	121	10
LBAD	A250	14	11	111	11
LBAJ	A251	11	5	182	5
LBAJ	A251	12	6	127	6
LBAJ	A251	13	7	128	7
LBAJ	A251	14	8	120	8
LBAM	A252	11	9	192	9
LBAM	A252	12	10	87	10
LBAM	A252	13	11	105	11
LBAM	A252	14	12	134	12
LCAH	A253	11	8	184	8
LCAH	A253	12	9	108	9
LCAH	A253	13	10	135	10
LCAH	A253	14	11	134	11
LCAR	A254	11	8	184	8
LCAR	A254	12	9	115	9
LCAR	A254	13	10	121	10
LCAR	A254	14	11	132	11
LCAT	A255	11	4	185	4
LCAT	A255	13	6	182	6
LCAV	A256	11	5	184	5
LCAV	A256	12	6	115	6
LCAV	A256	13	7	121	7
LCAV	A256	14	8	161	8
LCAX	A257	11	4	205	4
LCAX	A257	13	6	149	6
LCAX	A257	14	7	139	7
LCAZ	A258	11	6	184	6
LCAZ	A258	12	7	115	7
LCAZ	A258	13	8	119	8
LCAZ	A258	14	9	139	9
LFAB	A259	12	6	120	6
LFAB	A259	13	7	142	7
LFAB	A259	14	8	148	8
LFAS	A260	13	7	147	7
LFAS	A260	14	8	160	8
LFAT	A261	11	7	205	7
LFAT	A261	12	8	115	8
LFAT	A261	13	9	142	9
LFAU	A262	11	6	192	6
LFAV	A263	12	6	107	6
LFAV	A263	13	7	128	7
LFAV	A263	14	8	104	8
LGAP	A264	11	4	192	4
LGAP	A264	12	5	157	5
LGAW	A265	11	5	197	5
LGAW	A265	12	6	107	6
LGAW	A265	13	7	128	7
LGAW	A265	14	8	104	8
LH8	A266	4	9	137	9
LH8	A266	6	11	142	11
LH8	A266	7	12	107	12
LH8	A266	8	13	153	13
LHAD	A267	13	10	128	10
LHAD	A267	14	11	148	11
LHAT	A268	12	9	181	9
LHAT	A268	13	10	128	10
LHAT	A268	14	11	141	11
LMAH	A269	11	5	184	5
LMAK	A270	11	6	184	6
LMAK	A270	12	7	127	7
LMAK	A270	13	8	107	8
LMAK	A270	14	9	166	9
LMAR	A271	11	7	184	7
LMAR	A271	12	8	113	8
LMAR	A271	13	9	112	9
LMAR	A271	14	10	132	10
LMAZ	A272	11	6	184	6
LMAZ	A272	13	8	133	8
LPAJ	A273	13	2	182	2
LPAJ	A273	14	3	141	3
LPAV	A274	13	2	217	2
LPAV	A274	14	3	148	3
LRAC	A275	14	3	139	3
LSAS	A276	13	2	128	2
LSAS	A276	14	3	134	3
LTS	A277	8	7	120	7
LZAM	A278	13	7	149	7
LZAS	A279	12	8	190	8
LZAS	A279	13	9	114	9
LZAS	A279	14	10	148	10
MMAS	A280	12	4	183	4
MMAS	A280	13	5	128	5
MMAS	A280	14	6	155	6
MMAU	A281	13	8	105	8
MMAU	A281	14	9	104	9
MMAZ	A282	12	6	183	6
MMAZ	A282	13	7	142	7
MMAZ	A282	14	8	148	8
MWAD	A283	12	5	190	5
MWAD	A283	13	6	121	6
MWAD	A283	14	7	146	7
NMAS	A284	13	6	128	6
NMAS	A284	14	7	127	7
NMAT	A285	13	10	121	10
NMAT	A285	14	11	127	11
NMAU	A286	13	8	128	8
NMAU	A286	14	9	127	9
NMAV	A287	13	7	114	7
NMAV	A287	14	8	148	8
NSAY	A288	14	7	127	7
NYAY	A289	13	10	183	10
PE5	A290	4	5	167	5
PE5	A290	7	8	134	8
PE5	A290	8	9	111	9
PE5	A290	9	10	152	10
PE5	A290	10	11	129	11
PE5	A290	11	12	100	12
PE5	A290	12	13	121	13
PH0	A291	6	7	183	7
PH0	A291	7	8	140	8
PH0	A291	8	9	141	9
PJAL	A292	14	7	134	7
PJAM	A293	13	7	190	7
PJAM	A293	14	8	148	8
PJAW	A294	14	6	127	6
RT0	A295	7	8	154	8
RT0	A295	8	9	120	9
RT0	A295	9	10	147	10
RT0	A295	10	11	130	11
RT0	A295	11	12	121	12
TGAJ	A296	14	8	180	8
THV	A297	9	4	158	4
THV	A297	12	7	108	7
THV	A297	13	8	156	8
THV	A297	14	9	113	9
TPAF	A298	14	8	168	8
TRAS	A299	14	8	166	8
TRAT	A300	14	7	187	7
TSAV	A301	14	8	173	8
TU9	A302	3	3	217	3
TU9	A302	4	4	144	4
TU9	A302	7	7	154	7
TU9	A302	8	8	141	8
TU9	A302	9	9	103	9
TU9	A302	10	10	116	10
TU9	A302	11	11	100	11
TU9	A302	12	12	101	12
TU9	A302	13	13	133	13
UNAS	A303	14	10	196	10
UNAW	A304	14	10	194	10

## Sheet: table 1 upper right panel
identity	pair	year	age	arrival date	ageclass
AAAX	A7	5	4	144	4
AAAX	A7	4	3	146	3
AAAZ	A8	9	8	147	8
AAAZ	A8	10	9	104	9
AAAZ	A8	8	7	120	7
AAAZ	A8	7	6	107	6
AAAZ	A8	6	5	109	5
AAAZ	A8	5	4	96	4
AAAZ	A8	4	3	132	3
ABAD	A9	7	6	127	6
ABAD	A9	8	7	120	7
ABAD	A9	6	5	144	5
ABAJ	A10	10	9	90	9
ABAJ	A10	9	8	126	8
ABAJ	A10	13	12	182	12
ABAJ	A10	11	10	200	10
ABAJ	A10	5	4	134	4
ABAJ	A10	7	6	79	6
ABAJ	A10	6	5	116	5
ABAJ	A10	12	11	93	11
ABAJ	A10	8	7	132	7
ABAR	A11	9	8	125	8
ABAR	A11	12	11	113	11
ABAR	A11	10	9	122	9
ABAR	A11	8	7	120	7
ABAR	A11	7	6	134	6
ABAR	A11	6	5	116	5
ABAR	A11	5	4	137	4
ABAR	A11	11	10	109	10
ABAZ	A12	8	7	118	7
ABAZ	A12	9	8	147	8
ACAJ	A13	5	4	159	4
ACAJ	A13	6	5	123	5
ACAJ	A13	7	6	114	6
ACAJ	A13	8	7	120	7
ACAJ	A13	9	8	98	8
ACAL	A14	6	5	109	5
ACAL	A14	4	3	104	3
ACAL	A14	5	4	96	4
ADAF	A15	10	9	118	9
ADAF	A15	14	13	141	13
ADAF	A15	11	10	114	10
ADAF	A15	9	8	125	8
ADAF	A15	8	7	120	7
ADAF	A15	7	6	127	6
ADAF	A15	6	5	137	5
ADAF	A15	5	4	157	4
ADAF	A15	13	12	114	12
ADAV	A16	6	5	116	5
ADAW	A17	5	4	180	4
ADAW	A17	6	5	130	5
AFAF	A18	7	6	133	6
AFAF	A18	8	7	141	7
AFAF	A18	6	5	137	5
AFAF	A18	5	4	144	4
AFAN	A19	6	5	123	5
AFAN	A19	7	6	114	6
AFAN	A19	8	7	78	7
AFAN	A19	9	8	96	8
AFAN	A19	5	4	135	4
AFAP	A20	6	5	109	5
AFAP	A20	14	13	194	13
AFAP	A20	13	12	149	12
AFAP	A20	11	10	186	10
AFAP	A20	9	8	117	8
AFAP	A20	7	6	111	6
AFAP	A20	5	4	144	4
AFAP	A20	8	7	120	7
AFAR	A21	10	9	146	9
AFAR	A21	9	8	138	8
AFAR	A21	14	13	155	13
AFAR	A21	13	12	142	12
AFAR	A21	6	5	207	5
AFAR	A21	8	7	141	7
AFAR	A21	7	6	142	6
AFAR	A21	11	10	143	10
AFAS	A22	8	7	141	7
AFAS	A22	14	13	148	13
AFAS	A22	13	12	135	12
AFAS	A22	12	11	120	11
AFAS	A22	11	10	99	10
AFAS	A22	9	8	117	8
AFAS	A22	7	6	118	6
AFAS	A22	6	5	109	5
AFAS	A22	5	4	82	4
AFAS	A22	10	9	111	9
AFAW	A23	9	8	147	8
AFAW	A23	8	7	106	7
AFAW	A23	6	5	116	5
AFAW	A23	5	4	135	4
AFAW	A23	7	6	107	6
AGAB	A24	6	5	102	5
AGAB	A24	7	6	79	6
AGAB	A24	5	4	19	4
AGAG	A25	8	7	120	7
AGAG	A25	14	13	118	13
AGAG	A25	13	12	133	12
AGAG	A25	12	11	114	11
AGAG	A25	11	10	116	10
AGAG	A25	9	8	147	8
AGAG	A25	7	6	134	6
AGAG	A25	6	5	130	5
AGAG	A25	5	4	137	4
AGAG	A25	10	9	159	9
AGAH	A26	5	4	141	4
AGAH	A26	6	5	144	5
AHAH	A27	6	5	116	5
AHAJ	A28	4	3	139	3
AHAJ	A28	7	6	140	6
AHAJ	A28	6	5	142	5
AHAJ	A28	5	4	141	4
AHAL	A29	5	4	144	4
AHAL	A29	6	5	130	5
AHAL	A29	7	6	128	6
AHAL	A29	8	7	155	7
AHAS	A30	6	5	137	5
AHAS	A30	13	12	114	12
AHAS	A30	11	10	116	10
AHAS	A30	10	9	125	9
AHAS	A30	9	8	152	8
AHAS	A30	7	6	149	6
AHAS	A30	5	4	159	4
AHAS	A30	8	7	132	7
AHAW	A31	7	6	118	6
AHAW	A31	8	7	159	7
AHAW	A31	5	4	131	4
AHAW	A31	6	5	130	5
AHAW	A31	9	8	147	8
AHAZ	A32	5	4	157	4
AHAZ	A32	6	5	149	5
AHAZ	A32	7	6	142	6
AHAZ	A32	8	7	153	7
AJAA	A33	7	6	135	6
AJAA	A33	14	13	141	13
AJAA	A33	13	12	149	12
AJAA	A33	12	11	197	11
AJAA	A33	11	10	129	10
AJAA	A33	10	9	132	9
AJAA	A33	8	7	132	7
AJAA	A33	6	5	137	5
AJAA	A33	9	8	167	8
AJAD	A34	6	5	123	5
AJAD	A34	9	8	105	8
AJAD	A34	10	9	118	9
AJAD	A34	7	6	111	6
AJAD	A34	8	7	120	7
AJAH	A35	6	5	116	5
AJAH	A35	7	6	127	6
AJAH	A35	8	7	120	7
AJAJ	A36	13	12	142	12
AJAJ	A36	14	13	148	13
AJAJ	A36	12	11	115	11
AJAJ	A36	11	10	116	10
AJAJ	A36	10	9	125	9
AJAJ	A36	9	8	201	8
AJAJ	A36	6	5	130	5
AJAJ	A36	5	4	144	4
AJAK	A37	7	6	125	6
AJAK	A37	8	7	141	7
AJAK	A37	9	8	125	8
AJAK	A37	10	9	102	9
AJAK	A37	6	5	151	5
ALAJ	A38	6	5	156	5
ALAK	A39	4	3	160	3
ALAK	A39	11	10	102	10
ALAK	A39	14	13	113	13
ALAK	A39	13	12	156	12
ALAK	A39	12	11	168	11
ALAK	A39	8	7	85	7
ALAK	A39	7	6	107	6
ALAK	A39	5	4	144	4
ALAK	A39	9	8	98	8
ALAK	A39	6	5	109	5
ALAP	A40	8	7	139	7
ALAP	A40	6	5	123	5
ALAP	A40	7	6	114	6
AMAD	A41	10	9	123	9
AMAD	A41	9	8	105	8
AMAD	A41	8	7	141	7
AMAD	A41	6	5	156	5
AMAD	A41	7	6	114	6
AMAK	A42	9	8	126	8
AMAK	A42	11	10	102	10
AMAK	A42	10	9	132	9
AMAK	A42	7	6	127	6
AMAK	A42	8	7	139	7
AMAK	A42	5	4	144	4
AMAK	A42	6	5	116	5
AMAL	A43	9	8	126	8
AMAL	A43	14	13	104	13
AMAL	A43	13	12	114	12
AMAL	A43	12	11	114	11
AMAL	A43	10	9	111	9
AMAL	A43	8	7	127	7
AMAL	A43	7	6	149	6
AMAL	A43	6	5	130	5
AMAL	A43	5	4	137	4
AMAL	A43	11	10	129	10
AMAX	A44	7	6	100	6
AMAX	A44	11	10	102	10
AMAX	A44	10	9	116	9
AMAX	A44	12	11	86	11
AMAX	A44	6	5	116	5
AMAX	A44	5	4	135	4
AMAX	A44	9	8	103	8
AMAX	A44	8	7	132	7
ANAB	A45	10	9	104	9
ANAB	A45	11	10	151	10
ANAB	A45	8	7	99	7
ANAB	A45	7	6	111	6
ANAB	A45	6	5	109	5
ANAB	A45	12	11	127	11
ANAD	A46	8	7	118	7
ANAD	A46	9	8	161	8
ANAN	A47	10	9	71	9
ANAN	A47	14	13	113	13
ANAN	A47	13	12	149	12
ANAN	A47	12	11	94	11
ANAN	A47	11	10	102	10
ANAN	A47	8	7	120	7
ANAN	A47	7	6	121	6
ANAN	A47	5	4	134	4
ANAN	A47	6	5	116	5
ANAN	A47	9	8	98	8
ANAS	A48	5	4	141	4
ANAS	A48	6	5	102	5
ANAS	A48	7	6	65	6
ANAS	A48	8	7	78	7
ANAS	A48	9	8	77	8
ANAW	A49	5	4	135	4
ANAW	A49	6	5	130	5
APAH	A50	5	4	134	4
APAH	A50	4	3	139	3
APAU	A51	7	6	118	6
APAU	A51	5	4	141	4
APAU	A51	6	5	137	5
ARAH	A52	6	5	144	5
ARAH	A52	7	6	156	6
ARAH	A52	8	7	159	7
ARAH	A52	9	8	140	8
ARAH	A52	10	9	136	9
AS1	A53	1	7	164	7
AS1	A53	2	8	93	8
ASAH	A54	10	9	146	9
ASAH	A54	14	13	134	13
ASAH	A54	13	12	135	12
ASAH	A54	12	11	115	11
ASAH	A54	11	10	129	10
ASAH	A54	8	7	120	7
ASAH	A54	7	6	128	6
ASAH	A54	6	5	130	5
ASAH	A54	5	4	135	4
ASAH	A54	9	8	147	8
ASAP	A55	9	8	117	8
ASAP	A55	4	3	149	3
ASAP	A55	14	13	120	13
ASAP	A55	13	12	128	12
ASAP	A55	12	11	115	11
ASAP	A55	10	9	122	9
ASAP	A55	8	7	120	7
ASAP	A55	7	6	114	6
ASAP	A55	6	5	130	5
ASAP	A55	5	4	135	4
ASAP	A55	11	10	123	10
ASAX	A56	5	4	137	4
ASAX	A56	10	9	125	9
ASAX	A56	13	12	146	12
ASAX	A56	12	11	114	11
ASAX	A56	14	13	134	13
ASAX	A56	11	10	109	10
ASAX	A56	9	8	131	8
ASAX	A56	8	7	139	7
ASAX	A56	6	5	137	5
ASAX	A56	4	3	146	3
ASAX	A56	7	6	135	6
ASAY	A57	6	5	137	5
ASAY	A57	7	6	121	6
ASAY	A57	8	7	120	7
ASAY	A57	9	8	131	8
ASAY	A57	10	9	125	9
ASAY	A57	11	10	135	10
ASAY	A57	12	11	114	11
ASAY	A57	13	12	126	12
AUAA	A58	7	6	127	6
AUAA	A58	8	7	127	7
AUAA	A58	5	4	141	4
AUAA	A58	6	5	137	5
AUAP	A59	5	4	141	4
AUAP	A59	6	5	130	5
AUAP	A59	7	6	135	6
AUAP	A59	8	7	120	7
AUAP	A59	9	8	145	8
AUAP	A59	10	9	125	9
AUAP	A59	11	10	129	10
AUAP	A59	12	11	108	11
AUAP	A59	13	12	112	12
AUAP	A59	14	13	132	13
AUAV	A60	9	8	105	8
AUAV	A60	12	11	94	11
AUAV	A60	10	9	97	9
AUAV	A60	8	7	120	7
AUAV	A60	6	5	102	5
AUAV	A60	7	6	107	6
AUAV	A60	11	10	100	10
AWAF	A61	8	7	132	7
AWAF	A61	9	8	126	8
AWAF	A61	7	6	133	6
AWAF	A61	6	5	137	5
AWAF	A61	5	4	145	4
AWAN	A62	7	6	127	6
AWAN	A62	8	7	125	7
AWAN	A62	9	8	117	8
AWAN	A62	6	5	130	5
AWAR	A63	12	11	94	11
AWAR	A63	10	9	83	9
AWAR	A63	13	12	112	12
AWAR	A63	11	10	113	10
AWAR	A63	8	7	182	7
AWAR	A63	4	3	139	3
AWAR	A63	5	4	137	4
AWAR	A63	14	13	120	13
AWAR	A63	9	8	96	8
AWAU	A64	5	4	153	4
AWAU	A64	6	5	137	5
AWAU	A64	7	6	134	6
AWAU	A64	8	7	173	7
AXAG	A65	5	4	135	4
AXAG	A65	8	7	118	7
AXAG	A65	6	5	116	5
AXAG	A65	4	3	139	3
AXAG	A65	7	6	107	6
BAAG	A66	4	3	146	3
BAAG	A66	5	4	137	4
BAAG	A66	6	5	130	5
BAAG	A66	7	6	121	6
BAAK	A67	10	9	97	9
BAAK	A67	5	4	137	4
BAAK	A67	11	10	102	10
BAAK	A67	12	11	94	11
BAAK	A67	8	7	15	7
BAAK	A67	6	5	102	5
BAAK	A67	7	6	107	6
BAAK	A67	9	8	84	8
BBAB	A68	7	6	100	6
BBAB	A68	10	9	116	9
BBAB	A68	8	7	97	7
BBAB	A68	6	5	116	5
BBAB	A68	5	4	141	4
BBAB	A68	4	3	125	3
BBAB	A68	9	8	96	8
BBAF	A69	10	9	129	9
BBAF	A69	14	13	132	13
BBAF	A69	13	12	133	12
BBAF	A69	12	11	166	11
BBAF	A69	9	8	140	8
BBAF	A69	8	7	168	7
BBAF	A69	7	6	128	6
BBAF	A69	6	5	137	5
BBAF	A69	5	4	153	4
BBAF	A69	11	10	121	10
BBAT	A70	10	9	104	9
BBAT	A70	6	5	116	5
BBAT	A70	7	6	121	6
BBAT	A70	8	7	99	7
BBAT	A70	9	8	145	8
BBAX	A1	13	12	114	12
BBAX	A1	12	11	86	11
BBAX	A1	11	10	116	10
BBAX	A1	10	9	102	9
BBAX	A1	9	8	112	8
BBAX	A1	8	7	141	7
BBAX	A1	6	5	123	5
BBAX	A1	7	6	111	6
BBAY	A71	7	6	128	6
BBAY	A71	6	5	142	5
BCAR	A72	4	3	153	3
BDAN	A73	7	6	121	6
BDAN	A73	8	7	139	7
BDAN	A73	9	8	145	8
BDAN	A73	10	9	104	9
BDAN	A73	11	10	106	10
BDAN	A73	12	11	92	11
BDAN	A73	13	12	126	12
BDAN	A73	6	5	123	5
BDAP	A74	5	4	135	4
BDAP	A74	8	7	132	7
BDAP	A74	6	5	123	5
BDAP	A74	7	6	107	6
BDAU	A75	6	5	123	5
BDAU	A75	7	6	118	6
BJAA	A76	10	9	167	9
BJAA	A76	14	13	132	13
BJAA	A76	13	12	126	12
BJAA	A76	12	11	114	11
BJAA	A76	11	10	113	10
BJAA	A76	8	7	120	7
BJAA	A76	7	6	128	6
BJAA	A76	5	4	144	4
BJAA	A76	9	8	147	8
BJAA	A76	6	5	130	5
BJAZ	A77	8	7	120	7
BJAZ	A77	9	8	145	8
BJAZ	A77	7	6	121	6
BJAZ	A77	6	5	130	5
BJAZ	A77	10	9	137	9
BKAA	A78	4	3	149	3
BKAA	A78	5	4	137	4
BKAN	A79	5	4	137	4
BKAN	A79	6	5	123	5
BKAX	A80	4	3	151	3
BKAX	A80	7	6	114	6
BKAX	A80	5	4	141	4
BKAX	A80	6	5	127	5
BLAD	A81	5	4	137	4
BLAD	A81	6	5	116	5
BLAD	A81	7	6	135	6
BLAD	A81	8	7	120	7
BLAD	A81	9	8	125	8
BLAD	A81	10	9	109	9
BLAD	A81	11	10	109	10
BLAD	A81	12	11	114	11
BLAD	A81	13	12	128	12
BLAD	A81	14	13	120	13
BLAH	A2	7	6	121	6
BLAH	A2	11	10	116	10
BLAH	A2	10	9	111	9
BLAH	A2	9	8	126	8
BLAH	A2	6	5	156	5
BLAH	A2	5	4	141	4
BLAH	A2	8	7	120	7
BLAN	A82	7	6	156	6
BLAR	A83	7	6	134	6
BLAR	A83	14	13	120	13
BLAR	A83	13	12	125	12
BLAR	A83	12	11	122	11
BLAR	A83	11	10	135	10
BLAR	A83	10	9	125	9
BLAR	A83	8	7	139	7
BLAR	A83	6	5	149	5
BLAR	A83	5	4	143	4
BLAR	A83	9	8	138	8
BMAA	A84	6	5	130	5
BMAA	A84	5	4	135	4
BMAA	A84	4	3	125	3
BMAN	A85	13	12	128	12
BMAN	A85	6	5	137	5
BMAN	A85	14	13	127	13
BMAN	A85	12	11	120	11
BMAN	A85	11	10	116	10
BMAN	A85	10	9	123	9
BMAN	A85	9	8	138	8
BMAN	A85	8	7	132	7
BMAN	A85	7	6	121	6
BMAT	A86	6	5	149	5
BMAT	A86	7	6	125	6
BMAT	A86	8	7	125	7
BMAT	A86	9	8	105	8
BMAT	A86	5	4	144	4
BNAC	A87	4	3	146	3
BNAC	A87	8	7	104	7
BNAC	A87	9	8	98	8
BNAC	A87	5	4	141	4
BNAC	A87	6	5	116	5
BNAC	A87	7	6	111	6
BNAH	A88	5	4	144	4
BNAH	A88	6	5	130	5
BNAH	A88	7	6	121	6
BNAH	A88	8	7	160	7
BNAH	A88	9	8	167	8
BNAH	A88	10	9	153	9
BNAH	A88	11	10	163	10
BNAH	A88	13	12	182	12
BNAH	A88	14	13	182	13
BNAR	A89	7	6	121	6
BNAR	A89	10	9	136	9
BNAR	A89	8	7	155	7
BNAR	A89	5	4	137	4
BNAR	A89	9	8	131	8
BNAR	A89	6	5	123	5
BNAT	A90	4	3	146	3
BNAT	A90	5	4	137	4
BNAT	A90	6	5	130	5
BPAL	A91	6	5	149	5
BPAL	A91	7	6	134	6
BPAL	A91	5	4	137	4
BPAZ	A92	5	4	141	4
BPAZ	A92	6	5	142	5
BPAZ	A92	4	3	144	3
BSAL	A93	11	10	113	10
BSAL	A93	14	13	127	13
BSAL	A93	13	12	105	12
BSAL	A93	12	11	66	11
BSAL	A93	9	8	98	8
BSAL	A93	8	7	106	7
BSAL	A93	7	6	114	6
BSAL	A93	6	5	144	5
BSAL	A93	10	9	132	9
BSAT	A94	5	4	135	4
BSAT	A94	6	5	130	5
BSAT	A94	7	6	125	6
BSAT	A94	8	7	120	7
BSAT	A94	9	8	126	8
BSAT	A94	10	9	118	9
BSAT	A94	11	10	186	10
BSAT	A94	12	11	127	11
BSAW	A3	7	6	114	6
BSAW	A3	8	7	131	7
BSAW	A3	6	5	191	5
BSAW	A3	5	4	137	4
BSAW	A3	9	8	98	8
BSAY	A95	10	9	102	9
BSAY	A95	14	13	141	13
BSAY	A95	13	12	142	12
BSAY	A95	11	10	113	10
BSAY	A95	9	8	105	8
BSAY	A95	8	7	120	7
BSAY	A95	7	6	107	6
BSAY	A95	6	5	116	5
BSAY	A95	5	4	137	4
BSAY	A95	12	11	115	11
BTAF	A96	13	12	121	12
BTAF	A96	14	13	120	13
BTAF	A96	10	9	125	9
BTAF	A96	12	11	122	11
BTAF	A96	11	10	123	10
BTAF	A96	8	7	131	7
BTAF	A96	7	6	125	6
BTAF	A96	6	5	142	5
BTAF	A96	5	4	134	4
BTAF	A96	9	8	125	8
BTAG	A97	14	13	155	13
BTAG	A97	8	7	120	7
BTAG	A97	9	8	126	8
BTAG	A97	12	11	127	11
BTAG	A97	13	12	156	12
BTAG	A97	7	6	142	6
BTAX	A98	13	12	128	12
BTAX	A98	12	11	108	11
BTAX	A98	11	10	113	10
BTAX	A98	10	9	118	9
BTAX	A98	9	8	133	8
BTAX	A98	8	7	120	7
BTAX	A98	7	6	121	6
BTAX	A98	5	4	137	4
BTAX	A98	14	13	113	13
BTAX	A98	6	5	137	5
CDAL	A99	14	11	127	11
CDAL	A99	13	10	135	10
CDAL	A99	12	9	115	9
CDAL	A99	11	8	184	8
CDAP	A100	11	5	185	5
CDAP	A100	12	6	107	6
CDAP	A100	13	7	182	7
DAAA	A101	11	9	99	9
DAAA	A101	14	12	104	12
DAAA	A101	12	10	86	10
DAAA	A101	10	8	102	8
DAAA	A101	9	7	110	7
DAAA	A101	8	6	197	6
DAAA	A101	13	11	135	11
DAAN	A102	8	5	194	5
DAAN	A102	9	6	125	6
DAAN	A102	10	7	83	7
DAAN	A102	11	8	88	8
DAAN	A102	12	9	134	9
DAAV	A3	9	6	96	6
DAAV	A3	10	7	90	7
DAAV	A3	11	8	114	8
DAAV	A3	12	9	106	9
DAAV	A3	13	10	105	10
DAAV	A3	14	11	104	11
DAAV	A3	8	5	190	5
DBAC	A103	8	5	189	5
DBAJ	A104	11	8	116	8
DBAJ	A104	8	5	190	5
DBAJ	A104	9	6	126	6
DBAJ	A104	10	7	115	7
DBAK	A105	13	10	142	10
DBAK	A105	12	9	120	9
DBAK	A105	11	8	149	8
DBAK	A105	10	7	115	7
DBAK	A105	8	5	194	5
DBAK	A105	14	11	148	11
DBAK	A105	9	6	119	6
DBAN	A106	12	9	115	9
DBAN	A106	14	11	134	11
DBAN	A106	13	10	128	10
DBAN	A106	11	8	99	8
DBAN	A106	10	7	102	7
DBAN	A106	8	5	203	5
DBAN	A106	9	6	126	6
DCAZ	A107	8	5	197	5
DCAZ	A107	9	6	125	6
DCAZ	A107	10	7	115	7
DCAZ	A107	11	8	107	8
DCAZ	A107	12	9	93	9
DCAZ	A107	13	10	114	10
DCAZ	A107	14	11	104	11
DDAB	A108	12	9	168	9
DDAB	A108	14	11	134	11
DDAB	A108	11	8	123	8
DDAB	A108	10	7	137	7
DDAB	A108	9	6	125	6
DDAB	A108	8	5	194	5
DDAB	A108	13	10	128	10
DDAD	A109	8	5	194	5
DDAD	A109	9	6	125	6
DDAD	A109	10	7	109	7
DDAJ	A110	9	6	138	6
DFAF	A111	12	4	126	4
DFAF	A111	13	5	126	5
DFAF	A111	14	6	125	6
DFAP	A112	12	4	149	4
DFAP	A112	13	5	155	5
DFAP	A112	14	6	195	6
DHAD	A4	11	8	137	8
DHAD	A4	8	5	182	5
DHAD	A4	9	6	147	6
DHAD	A4	10	7	137	7
DHAF	A113	10	7	109	7
DHAF	A113	8	5	187	5
DHAF	A113	9	6	125	6
DJAY	A114	9	5	147	5
DJAY	A114	10	6	167	6
DJAY	A114	11	7	116	7
DJAY	A114	12	8	157	8
DJAY	A114	14	10	113	10
DKAW	A115	9	6	131	6
DKAW	A115	14	11	148	11
DKAW	A115	13	10	121	10
DKAW	A115	12	9	107	9
DKAW	A115	10	7	118	7
DKAW	A115	11	8	129	8
DKAX	A116	9	4	110	4
DLAV	A117	12	4	157	4
DMAC	A118	13	5	119	5
DMAJ	A119	13	5	126	5
DMAU	A120	13	5	128	5
DMAU	A120	14	6	134	6
DMAW	A121	11	3	156	3
DMAW	A121	12	4	157	4
DMAW	A121	13	5	135	5
DMAW	A121	14	6	155	6
DNAU	A122	13	5	114	5
DNAU	A122	14	6	113	6
DPAD	A123	13	5	126	5
DPAD	A123	14	6	111	6
DPAK	A124	14	6	194	6
DPAK	A124	13	5	156	5
DPAM	A125	11	3	143	3
DPAM	A125	12	4	115	4
DPAZ	A126	12	4	120	4
DPAZ	A126	13	5	128	5
DPAZ	A126	14	6	120	6
DRAR	A127	12	4	160	4
DRAR	A127	13	5	147	5
DRAR	A127	14	6	153	6
DRAZ	A128	11	3	200	3
DRAZ	A128	12	4	141	4
DRAZ	A128	13	5	135	5
DSAJ	A129	14	6	83	6
DSAJ	A129	11	3	121	3
DSAJ	A129	12	4	106	4
DSAJ	A129	13	5	112	5
DTAG	A130	14	6	151	6
DTAG	A130	12	4	129	4
DTAG	A130	13	5	126	5
DUAB	A131	12	4	66	4
DUAB	A131	13	5	105	5
DUAB	A131	14	6	104	6
DUAD	A132	13	5	147	5
DUAD	A132	12	4	183	4
DUAY	A133	14	6	132	6
DUAY	A133	13	5	119	5
DUAY	A133	12	4	133	4
DVAJ	A134	11	3	143	3
DVAJ	A134	12	4	182	4
DVAJ	A134	13	5	128	5
DVAJ	A134	14	6	152	6
DVAL	A135	14	6	160	6
DVAP	A136	13	5	121	5
DVAP	A136	14	6	104	6
DVAU	A137	13	5	128	5
DVAU	A137	14	6	104	6
DVAU	A137	12	4	115	4
DVAY	A138	13	5	156	5
DVAY	A138	14	6	127	6
DWAJ	A139	14	6	141	6
DWAJ	A139	12	4	115	4
DWAJ	A139	13	5	142	5
DWAR	A140	13	5	121	5
DWAS	A141	14	6	134	6
DWAS	A141	13	5	135	5
DWAY	A142	13	5	147	5
DWAY	A142	14	6	151	6
DXAS	A143	11	3	137	3
DXAS	A143	12	4	183	4
DXAT	A144	14	6	148	6
DXAT	A144	13	5	135	5
DXAU	A145	14	6	134	6
DXAU	A145	13	5	142	5
DXAU	A145	11	3	143	3
DXAU	A145	12	4	120	4
DXAX	A146	11	3	149	3
DXAX	A146	12	4	129	4
DXAX	A146	13	5	140	5
DXAX	A146	14	6	125	6
DYAC	A147	14	6	125	6
DYAC	A147	12	4	121	4
DYAC	A147	13	5	133	5
DYAG	A148	12	4	183	4
DYAG	A148	13	5	126	5
DYAG	A148	14	6	104	6
DYAR	A149	12	4	153	4
DYAR	A149	13	5	126	5
DYAR	A149	14	6	146	6
DZAK	A150	13	5	112	5
DZAM	A151	13	5	162	5
DZAM	A151	14	6	134	6
DZAX	A152	12	4	129	4
DZAX	A152	13	5	128	5
DZAX	A152	14	6	113	6
E089	A153	11	10	123	10
E089	A153	8	7	141	7
E089	A153	14	13	127	13
E089	A153	13	12	135	12
E089	A153	9	8	138	8
E089	A153	7	6	142	6
E089	A153	10	9	118	9
E373	A154	8	6	148	6
E373	A154	9	7	182	7
E373	A154	10	8	125	8
E373	A154	11	9	129	9
E523	A155	10	7	167	7
E523	A155	11	8	143	8
E523	A155	12	9	127	9
E523	A155	13	10	140	10
E523	A155	14	11	125	11
E720	A4	11	8	123	8
E720	A4	12	9	122	9
E720	A4	13	10	121	10
E720	A4	9	6	131	6
E720	A4	14	11	113	11
E720	A4	8	5	139	5
E720	A4	7	4	127	4
E720	A4	10	7	132	7
EA91	A156	6	8	116	8
EA91	A156	11	13	106	13
EA91	A156	10	12	116	12
EA91	A156	9	11	152	11
EA91	A156	7	9	114	9
EA91	A156	5	7	143	7
EA91	A156	4	6	193	6
EA91	A156	8	10	104	10
EL52	A157	7	9	133	9
EL52	A157	10	12	123	12
EL52	A157	11	13	92	13
EL52	A157	8	10	92	10
EL52	A157	5	7	141	7
EL52	A157	4	6	111	6
EL52	A157	3	5	147	5
EL52	A157	2	4	114	4
EL52	A157	9	11	103	11
EL52	A157	6	8	102	8
ES51	A5	7	9	134	9
ES51	A5	11	13	81	13
ES51	A5	8	10	141	10
ES51	A5	6	8	102	8
ES51	A5	5	7	54	7
ES51	A5	4	6	69	6
ES51	A5	3	5	126	5
ES51	A5	9	11	63	11
ET54	A6	11	13	116	13
ET54	A6	3	5	119	5
ET54	A6	4	6	144	6
ET54	A6	7	9	147	9
ET54	A6	9	11	168	11
ET54	A6	10	12	185	12
EU83	A158	12	13	107	13
EU83	A158	11	12	135	12
EU83	A158	8	9	127	9
EU83	A158	9	10	147	10
EU83	A158	10	11	116	11
EY16	A159	11	12	135	12
EY16	A159	12	13	122	13
EY16	A159	10	11	136	11
EY16	A159	9	10	145	10
EY16	A159	8	9	127	9
EY16	A159	7	8	135	8
GDAP	A160	14	5	134	5
GDAP	A160	13	4	170	4
GDAX	A161	13	4	135	4
GDAX	A161	14	5	113	5
GGAC	A162	13	4	126	4
GGAC	A162	14	5	146	5
GGAV	A163	14	5	132	5
GGAV	A163	13	4	126	4
GHAF	A164	9	8	202	8
GJAN	A165	9	5	200	5
GJAN	A165	10	6	111	6
GJAN	A165	11	7	99	7
GJAN	A165	12	8	115	8
GJAT	A166	14	6	132	6
GJAT	A166	11	3	158	3
GJAT	A166	13	5	140	5
GKAB	A167	13	5	156	5
GKAB	A167	14	6	120	6
GKAV	A168	13	5	121	5
GKAV	A168	14	6	146	6
GLAB	A5	9	6	203	6
GLAB	A5	11	8	165	8
GLAB	A5	13	10	182	10
GLAB	A5	14	11	187	11
GLAC	A169	12	4	183	4
GLAC	A169	14	6	120	6
GLAC	A169	13	5	149	5
GLAY	A170	14	12	113	12
GLAY	A170	9	7	207	7
GLAY	A170	10	8	144	8
GLAY	A170	11	9	135	9
GLAY	A170	12	10	115	10
GLAY	A170	13	11	135	11
GNAG	A171	13	4	133	4
GNAG	A171	14	5	125	5
GNAR	A172	13	4	128	4
GNAR	A172	14	5	120	5
GNAU	A173	13	4	156	4
GNAU	A173	14	5	141	5
GPAD	A174	13	4	161	4
GPAD	A174	14	5	146	5
GPAR	A175	13	4	126	4
GPAR	A175	14	5	132	5
GRAC	A176	13	4	140	4
GRAS	A177	13	4	154	4
GRAS	A177	14	5	118	5
GSAN	A178	13	4	121	4
GSAN	A178	14	5	118	5
GSAW	A179	14	5	132	5
GSAW	A179	13	4	140	4
GSAY	A180	13	4	160	4
GSAY	A180	14	5	146	5
GTAJ	A181	13	4	133	4
GTAJ	A181	14	5	148	5
GTAK	A182	13	4	126	4
GTAK	A182	14	5	146	5
GWAJ	A183	12	10	86	10
GWAJ	A183	13	11	112	11
GWAJ	A183	14	12	111	12
GWAJ	A183	11	9	92	9
GWAJ	A183	10	8	90	8
GWAJ	A183	9	7	195	7
GWAM	A184	10	5	118	5
GWAM	A184	11	6	123	6
GWAM	A184	9	4	189	4
GWAN	A185	9	6	194	6
GWAW	A186	9	6	195	6
GWAW	A186	12	9	101	9
GWAW	A186	10	7	102	7
GWAW	A186	11	8	88	8
GWAZ	A187	9	6	195	6
GWAZ	A187	10	7	90	7
GWAZ	A187	11	8	102	8
GZAW	A188	12	8	134	8
GZAW	A188	14	10	134	10
GZAW	A188	11	7	137	7
GZAW	A188	10	6	137	6
GZAW	A188	9	5	194	5
GZAW	A188	13	9	149	9
GZAZ	A2	14	11	41	11
GZAZ	A2	9	6	195	6
GZAZ	A2	10	7	71	7
GZAZ	A2	11	8	92	8
GZAZ	A2	12	9	73	9
GZAZ	A2	13	10	176	10
HAAJ	A189	13	3	133	3
HAAJ	A189	14	4	160	4
HAAP	A190	14	4	146	4
HCAP	A191	14	4	183	4
HCAR	A192	14	4	148	4
HCAT	A193	14	4	148	4
HCAU	A194	14	4	159	4
HDAG	A195	14	4	139	4
HFAA	A196	14	4	146	4
HFAR	A197	14	4	146	4
HGAU	A198	14	4	146	4
HHAD	A199	13	3	133	3
HJAB	A200	14	4	155	4
HJAM	A201	13	3	140	3
HJAM	A201	14	4	139	4
HKAH	A202	14	4	152	4
HKAP	A203	14	4	139	4
HKAT	A204	14	4	151	4
HKAX	A205	14	4	132	4
HLAP	A206	14	4	187	4
HLAU	A207	14	4	146	4
HMAL	A208	14	4	196	4
HMAT	A209	13	3	153	3
HNAF	A210	13	3	154	3
HNAF	A210	14	4	132	4
HNAG	A211	14	4	134	4
HNAT	A212	13	3	177	3
HNAT	A212	14	4	148	4
HPAJ	A213	13	3	128	3
HPAJ	A213	14	4	120	4
HRAA	A214	13	3	149	3
HRAA	A214	14	4	141	4
HSAJ	A216	14	4	134	4
HSAL	A217	14	4	141	4
HSAN	A218	14	4	125	4
HSAN	A218	13	3	140	3
HSAZ	A219	14	4	155	4
HTAS	A220	14	4	132	4
HUAF	A221	14	4	134	4
HWAK	A222	11	5	178	5
HWAK	A222	12	6	115	6
HWAK	A222	13	7	121	7
HWAK	A222	14	8	134	8
HWAN	A223	14	11	113	11
HWAN	A223	13	10	121	10
HWAN	A223	12	9	114	9
HWAN	A223	11	8	170	8
HWAV	A224	12	8	107	8
HWAV	A224	11	7	178	7
HWAZ	A225	12	8	114	8
HWAZ	A225	13	9	135	9
HWAZ	A225	14	10	120	10
HYAR	A226	14	4	120	4
HZAB	A227	13	3	146	3
HZAB	A227	14	4	111	4
HZAD	A228	14	4	120	4
HZAK	A229	14	4	104	4
HZAS	A230	14	4	148	4
HZAV	A231	14	4	166	4
KCAR	A232	10	8	173	8
KCAR	A232	11	9	116	9
KCAR	A232	12	10	122	10
KCAS	A233	10	4	173	4
KCAS	A233	12	6	114	6
KCAS	A233	11	5	102	5
KCAV	A234	10	4	179	4
KCAV	A234	11	5	123	5
KCAV	A234	12	6	120	6
KCAV	A234	13	7	128	7
KCAV	A234	14	8	120	8
KCAZ	A235	11	7	113	7
KCAZ	A235	14	10	134	10
KCAZ	A235	12	8	94	8
KCAZ	A235	10	6	186	6
KCAZ	A235	13	9	128	9
KFAJ	A236	10	5	193	5
KGAD	A237	10	6	186	6
KGAD	A237	11	7	116	7
KGAD	A237	12	8	127	8
KGAH	A238	14	9	182	9
KGAH	A238	12	7	122	7
KGAH	A238	11	6	102	6
KGAH	A238	10	5	187	5
KGAT	A239	11	6	113	6
KGAT	A239	12	7	80	7
KGAT	A239	13	8	156	8
KGAT	A239	14	9	113	9
KGAT	A239	10	5	187	5
KGAW	A240	11	10	102	10
KGAW	A240	14	13	113	13
KGAW	A240	12	11	87	11
KGAW	A240	10	9	187	9
KGAW	A240	13	12	114	12
KJAJ	A241	14	4	148	4
KJAZ	A242	14	4	120	4
KKAU	A1	14	11	120	11
KKAU	A1	10	7	193	7
KKAU	A1	11	8	116	8
KKAU	A1	12	9	115	9
KKAU	A1	13	10	121	10
KWAD	A243	11	5	178	5
KYAF	A244	11	5	170	5
KYAL	A245	11	7	185	7
KYAL	A245	12	8	114	8
KYAL	A245	13	9	121	9
KYAL	A245	14	10	120	10
KYAU	A246	14	9	134	9
KYAU	A246	11	6	170	6
KYAU	A246	13	8	135	8
KZAH	A6	14	8	139	8
KZAH	A6	13	7	121	7
KZAH	A6	11	5	178	5
KZAH	A6	12	6	115	6
KZAL	A247	14	7	125	7
KZAL	A247	11	4	184	4
KZAL	A247	12	5	120	5
KZAL	A247	13	6	112	6
KZAM	A248	14	10	139	10
KZAM	A248	13	9	105	9
KZAM	A248	12	8	122	8
KZAM	A248	11	7	185	7
KZAR	A249	11	5	185	5
LBAD	A250	11	8	185	8
LBAD	A250	12	9	107	9
LBAD	A250	13	10	121	10
LBAD	A250	14	11	111	11
LBAJ	A251	11	5	182	5
LBAJ	A251	14	8	120	8
LBAJ	A251	12	6	127	6
LBAJ	A251	13	7	128	7
LBAM	A252	11	9	192	9
LBAM	A252	12	10	87	10
LBAM	A252	13	11	105	11
LBAM	A252	14	12	134	12
LCAH	A253	13	10	135	10
LCAH	A253	12	9	108	9
LCAH	A253	11	8	184	8
LCAH	A253	14	11	134	11
LCAR	A254	11	8	184	8
LCAR	A254	12	9	115	9
LCAR	A254	13	10	121	10
LCAR	A254	14	11	132	11
LCAT	A255	13	6	182	6
LCAT	A255	11	4	185	4
LCAV	A256	14	8	161	8
LCAV	A256	13	7	121	7
LCAV	A256	11	5	184	5
LCAV	A256	12	6	115	6
LCAX	A257	11	4	205	4
LCAX	A257	13	6	149	6
LCAX	A257	14	7	139	7
LCAZ	A258	13	8	119	8
LCAZ	A258	14	9	139	9
LCAZ	A258	12	7	115	7
LCAZ	A258	11	6	184	6
LFAB	A259	13	7	142	7
LFAB	A259	14	8	148	8
LFAB	A259	12	6	120	6
LFAS	A260	13	7	147	7
LFAS	A260	14	8	160	8
LFAT	A261	12	8	115	8
LFAT	A261	13	9	142	9
LFAT	A261	11	7	205	7
LFAU	A262	11	6	192	6
LFAV	A263	12	6	107	6
LFAV	A263	13	7	128	7
LFAV	A263	14	8	104	8
LGAP	A264	11	4	192	4
LGAP	A264	12	5	157	5
LGAW	A265	12	6	107	6
LGAW	A265	13	7	128	7
LGAW	A265	11	5	197	5
LGAW	A265	14	8	104	8
LH8	A266	4	9	137	9
LH8	A266	6	11	142	11
LH8	A266	7	12	107	12
LH8	A266	8	13	153	13
LHAD	A267	13	10	128	10
LHAD	A267	14	11	148	11
LHAT	A268	12	9	181	9
LHAT	A268	13	10	128	10
LHAT	A268	14	11	141	11
LMAH	A269	11	5	184	5
LMAK	A270	11	6	184	6
LMAK	A270	12	7	127	7
LMAK	A270	13	8	107	8
LMAK	A270	14	9	166	9
LMAR	A271	12	8	113	8
LMAR	A271	13	9	112	9
LMAR	A271	14	10	132	10
LMAR	A271	11	7	184	7
LMAZ	A272	11	6	184	6
LMAZ	A272	13	8	133	8
LPAJ	A273	14	3	141	3
LPAV	A274	14	3	148	3
LRAC	A275	14	3	139	3
LSAS	A276	14	3	134	3
LTS	A277	8	7	120	7
LZAM	A278	13	7	149	7
LZAS	A279	13	9	114	9
LZAS	A279	14	10	148	10
LZAS	A279	12	8	190	8
MMAS	A280	12	4	183	4
MMAS	A280	13	5	128	5
MMAS	A280	14	6	155	6
MMAU	A281	13	8	105	8
MMAU	A281	14	9	104	9
MMAZ	A282	12	6	183	6
MMAZ	A282	14	8	148	8
MMAZ	A282	13	7	142	7
MWAD	A283	12	5	190	5
MWAD	A283	13	6	121	6
MWAD	A283	14	7	146	7
NMAS	A284	13	6	128	6
NMAS	A284	14	7	127	7
NMAT	A285	14	11	127	11
NMAT	A285	13	10	121	10
NMAU	A286	13	8	128	8
NMAU	A286	14	9	127	9
NMAV	A287	13	7	114	7
NMAV	A287	14	8	148	8
NSAY	A288	14	7	127	7
NYAY	A289	13	10	183	10
PE5	A290	10	11	129	11
PE5	A290	4	5	167	5
PE5	A290	11	12	100	12
PE5	A290	12	13	121	13
PE5	A290	7	8	134	8
PE5	A290	9	10	152	10
PE5	A290	8	9	111	9
PH0	A291	6	7	183	7
PH0	A291	7	8	140	8
PH0	A291	8	9	141	9
PJAL	A292	14	7	134	7
PJAM	A293	14	8	148	8
PJAM	A293	13	7	190	7
PJAW	A294	14	6	127	6
RT0	A295	8	9	120	9
RT0	A295	9	10	147	10
RT0	A295	10	11	130	11
RT0	A295	11	12	121	12
RT0	A295	7	8	154	8
TGAJ	A296	14	8	180	8
THV	A297	14	9	113	9
THV	A297	13	8	156	8
THV	A297	9	4	158	4
THV	A297	12	7	108	7
TPAF	A298	14	8	168	8
TRAS	A299	14	8	166	8
TRAT	A300	14	7	187	7
TSAV	A301	14	8	173	8
TU9	A302	7	7	154	7
TU9	A302	8	8	141	8
TU9	A302	9	9	103	9
TU9	A302	10	10	116	10
TU9	A302	11	11	100	11
TU9	A302	12	12	101	12
TU9	A302	13	13	133	13
UNAS	A303	14	10	196	10
UNAW	A304	14	10	194	10

## Sheet: table 1 lower left panel
identity	jaar	age	α	ω	arrival date	ageclass
AAAX	2	2	3	4	215	2
AAAX	3	3	3	4	146	3
AAAX	4	4	3	4	144	4
ABAD	3	3	4	7	161	3
ABAD	5	5	4	7	144	5
ABAD	6	6	4	7	127	6
ABAD	7	7	4	7	120	7
ABAR	2	2	4	11	166	2
ABAR	3	3	4	11	146	3
ABAR	4	4	4	11	137	4
ABAR	5	5	4	11	116	5
ABAR	6	6	4	11	134	6
ABAR	7	7	4	11	120	7
ABAR	8	8	4	11	125	8
ABAR	9	9	4	11	122	9
ABAR	10	10	4	11	109	10
ABAR	11	11	4	11	113	11
ABAZ	2	2	6	9	201	2
ABAZ	3	3	6	9	146	3
ABAZ	4	4	6	9	141	4
ABAZ	7	7	6	9	118	7
ABAZ	8	8	6	9	147	8
ACAJ	2	2	4	8	166	2
ACAJ	3	3	4	8	165	3
ACAJ	4	4	4	8	159	4
ACAJ	5	5	4	8	123	5
ACAJ	6	6	4	8	114	6
ACAJ	7	7	4	8	120	7
ACAJ	8	8	4	8	98	8
ACAL	2	2	3	5	199	2
ACAL	3	3	3	5	104	3
ACAL	4	4	3	5	96	4
ACAL	5	5	3	5	109	5
ADAV	2	2	5	5	180	2
ADAV	4	4	5	5	135	4
ADAV	5	5	5	5	116	5
ADAW	2	2	4	5	199	2
ADAW	3	3	4	5	139	3
ADAW	4	4	4	5	180	4
ADAW	5	5	4	5	130	5
AFAF	3	3	4	7	161	3
AFAF	4	4	4	7	144	4
AFAF	5	5	4	7	137	5
AFAF	6	6	4	7	133	6
AFAF	7	7	4	7	141	7
AFAN	2	2	4	9	126	2
AFAN	3	3	4	9	111	3
AFAN	4	4	4	9	135	4
AFAN	5	5	4	9	123	5
AFAN	6	6	4	9	114	6
AFAN	7	7	4	9	78	7
AFAN	8	8	4	9	96	8
AFAW	2	2	4	8	201	2
AFAW	3	3	4	8	153	3
AFAW	4	4	4	8	135	4
AFAW	5	5	4	8	116	5
AFAW	6	6	4	8	107	6
AFAW	7	7	4	8	106	7
AFAW	8	8	4	8	147	8
AGAB	3	3	4	6	161	3
AGAB	4	4	4	6	19	4
AGAB	5	5	4	6	102	5
AGAB	6	6	4	6	79	6
AGAH	2	2	4	5	180	2
AGAH	3	3	4	5	132	3
AGAH	4	4	4	5	141	4
AGAH	5	5	4	5	144	5
AHAH	3	3	5	5	111	3
AHAH	4	4	5	5	137	4
AHAH	5	5	5	5	116	5
AHAJ	2	2	3	6	164	2
AHAJ	3	3	3	6	139	3
AHAJ	4	4	3	6	141	4
AHAJ	5	5	3	6	142	5
AHAJ	6	6	3	6	140	6
AHAL	2	2	4	7	166	2
AHAL	3	3	4	7	158	3
AHAL	4	4	4	7	144	4
AHAL	5	5	4	7	130	5
AHAL	6	6	4	7	128	6
AHAL	7	7	4	7	155	7
AHAZ	2	2	4	8	201	2
AHAZ	3	3	4	8	160	3
AHAZ	4	4	4	8	157	4
AHAZ	5	5	4	8	149	5
AHAZ	6	6	4	8	142	6
AHAZ	7	7	4	8	153	7
AJAD	3	3	5	9	144	3
AJAD	4	4	5	9	137	4
AJAD	5	5	5	9	123	5
AJAD	6	6	5	9	111	6
AJAD	7	7	5	9	120	7
AJAD	8	8	5	9	105	8
AJAD	9	9	5	9	118	9
AJAH	3	3	4	7	149	3
AJAH	5	5	4	7	116	5
AJAH	6	6	4	7	127	6
AJAH	7	7	4	7	120	7
AJAK	2	2	5	9	147	2
AJAK	3	3	5	9	139	3
AJAK	4	4	5	9	137	4
AJAK	5	5	5	9	151	5
AJAK	6	6	5	9	125	6
AJAK	7	7	5	9	141	7
AJAK	8	8	5	9	125	8
AJAK	9	9	5	9	102	9
ALAJ	5	5	5	5	156	5
ALAP	2	2	5	7	168	2
ALAP	3	3	5	7	172	3
ALAP	4	4	5	7	137	4
ALAP	5	5	5	7	123	5
ALAP	6	6	5	7	114	6
ALAP	7	7	5	7	139	7
AMAD	3	3	5	9	181	3
AMAD	4	4	5	9	143	4
AMAD	5	5	5	9	156	5
AMAD	6	6	5	9	114	6
AMAD	7	7	5	9	141	7
AMAD	8	8	5	9	105	8
AMAD	9	9	5	9	123	9
AMAK	2	2	4	10	119	2
AMAK	3	3	4	10	151	3
AMAK	4	4	4	10	144	4
AMAK	5	5	4	10	116	5
AMAK	6	6	4	10	127	6
AMAK	7	7	4	10	139	7
AMAK	8	8	4	10	126	8
AMAK	9	9	4	10	132	9
AMAK	10	10	4	10	102	10
ANAB	2	2	5	11	182	2
ANAB	3	3	5	11	132	3
ANAB	4	4	5	11	141	4
ANAB	5	5	5	11	109	5
ANAB	6	6	5	11	111	6
ANAB	7	7	5	11	99	7
ANAB	9	9	5	11	104	9
ANAB	10	10	5	11	151	10
ANAB	11	11	5	11	127	11
ANAD	7	7	5	8	118	7
ANAD	8	8	5	8	161	8
ANAS	3	3	4	8	153	3
ANAS	4	4	4	8	141	4
ANAS	5	5	4	8	102	5
ANAS	6	6	4	8	65	6
ANAS	7	7	4	8	78	7
ANAS	8	8	4	8	77	8
ANAW	2	2	4	5	147	2
ANAW	3	3	4	5	146	3
ANAW	4	4	4	5	135	4
ANAW	5	5	4	5	130	5
APAH	2	2	3	4	175	2
APAH	3	3	3	4	139	3
APAH	4	4	3	4	134	4
APAU	2	2	4	6	166	2
APAU	3	3	4	6	146	3
APAU	4	4	4	6	141	4
APAU	5	5	4	6	137	5
APAU	6	6	4	6	118	6
ARAH	2	2	5	9	196	2
ARAH	3	3	5	9	160	3
ARAH	5	5	5	9	144	5
ARAH	6	6	5	9	156	6
ARAH	7	7	5	9	159	7
ARAH	8	8	5	9	140	8
ARAH	9	9	5	9	136	9
AUAA	2	2	4	9	206	2
AUAA	3	3	4	9	149	3
AUAA	4	4	4	9	141	4
AUAA	5	5	4	9	137	5
AUAA	6	6	4	9	127	6
AUAA	7	7	4	9	127	7
AUAV	1	1	5	11	129	1
AUAV	3	3	5	11	177	3
AUAV	4	4	5	11	137	4
AUAV	5	5	5	11	102	5
AUAV	6	6	5	11	107	6
AUAV	7	7	5	11	120	7
AUAV	8	8	5	11	105	8
AUAV	9	9	5	11	97	9
AUAV	10	10	5	11	100	10
AUAV	11	11	5	11	94	11
AWAF	3	3	4	9	174	3
AWAF	4	4	4	9	145	4
AWAF	5	5	4	9	137	5
AWAF	6	6	4	9	133	6
AWAF	7	7	4	9	132	7
AWAF	8	8	4	9	126	8
AWAN	3	3	5	8	207	3
AWAN	4	4	5	8	141	4
AWAN	5	5	5	8	130	5
AWAN	6	6	5	8	127	6
AWAN	7	7	5	8	125	7
AWAN	8	8	5	8	117	8
AWAU	2	2	4	7	166	2
AWAU	3	3	4	7	146	3
AWAU	4	4	4	7	153	4
AWAU	5	5	4	7	137	5
AWAU	6	6	4	7	134	6
AWAU	7	7	4	7	173	7
AXAG	3	3	3	7	139	3
AXAG	4	4	3	7	135	4
AXAG	5	5	3	7	116	5
AXAG	6	6	3	7	107	6
AXAG	7	7	3	7	118	7
BAAG	2	2	3	6	192	2
BAAG	3	3	3	6	146	3
BAAG	4	4	3	6	137	4
BAAG	5	5	3	6	130	5
BAAG	6	6	3	6	121	6
BAAK	2	2	4	11	166	2
BAAK	3	3	4	11	156	3
BAAK	4	4	4	11	137	4
BAAK	5	5	4	11	102	5
BAAK	6	6	4	11	107	6
BAAK	7	7	4	11	15	7
BAAK	8	8	4	11	84	8
BAAK	9	9	4	11	97	9
BAAK	10	10	4	11	102	10
BAAK	11	11	4	11	94	11
BBAB	3	3	3	9	125	3
BBAB	4	4	3	9	141	4
BBAB	5	5	3	9	116	5
BBAB	6	6	3	9	100	6
BBAB	7	7	3	9	97	7
BBAB	8	8	3	9	96	8
BBAB	9	9	3	9	116	9
BBAT	3	3	5	9	167	3
BBAT	4	4	5	9	141	4
BBAT	5	5	5	9	116	5
BBAT	6	6	5	9	121	6
BBAT	7	7	5	9	99	7
BBAT	8	8	5	9	145	8
BBAT	9	9	5	9	104	9
BBAY	3	3	5	6	177	3
BBAY	4	4	5	6	143	4
BBAY	5	5	5	6	142	5
BBAY	6	6	5	6	128	6
BCAR	2	2	3	3	216	2
BCAR	3	3	3	3	153	3
BDAP	2	2	4	7	185	2
BDAP	3	3	4	7	140	3
BDAP	4	4	4	7	135	4
BDAP	5	5	4	7	123	5
BDAP	6	6	4	7	107	6
BDAP	7	7	4	7	132	7
BDAU	2	2	5	6	220	2
BDAU	3	3	5	6	146	3
BDAU	4	4	5	6	135	4
BDAU	5	5	5	6	123	5
BDAU	6	6	5	6	118	6
BJAZ	2	2	5	9	182	2
BJAZ	3	3	5	9	149	3
BJAZ	5	5	5	9	130	5
BJAZ	6	6	5	9	121	6
BJAZ	7	7	5	9	120	7
BJAZ	8	8	5	9	145	8
BJAZ	9	9	5	9	137	9
BKAA	2	2	3	4	194	2
BKAA	3	3	3	4	149	3
BKAA	4	4	3	4	137	4
BKAN	3	3	4	5	165	3
BKAN	4	4	4	5	137	4
BKAN	5	5	4	5	123	5
BKAX	2	2	3	6	192	2
BKAX	3	3	3	6	151	3
BKAX	4	4	3	6	141	4
BKAX	5	5	3	6	127	5
BKAX	6	6	3	6	114	6
BLAH	2	2	4	10	178	2
BLAH	3	3	4	10	161	3
BLAH	4	4	4	10	141	4
BLAH	5	5	4	10	156	5
BLAH	6	6	4	10	121	6
BLAH	7	7	4	10	120	7
BLAH	8	8	4	10	126	8
BLAH	9	9	4	10	111	9
BLAH	10	10	4	10	116	10
BLAN	2	2	6	6	201	2
BLAN	3	3	6	6	167	3
BLAN	6	6	6	6	156	6
BMAA	3	3	3	5	125	3
BMAA	4	4	3	5	135	4
BMAA	5	5	3	5	130	5
BMAT	2	2	4	9	192	2
BMAT	4	4	4	9	144	4
BMAT	5	5	4	9	149	5
BMAT	6	6	4	9	125	6
BMAT	7	7	4	9	125	7
BMAT	8	8	4	9	105	8
BNAC	2	2	3	8	196	2
BNAC	3	3	3	8	146	3
BNAC	4	4	3	8	141	4
BNAC	5	5	3	8	116	5
BNAC	6	6	3	8	111	6
BNAC	7	7	3	8	104	7
BNAC	8	8	3	8	98	8
BNAR	2	2	4	9	187	2
BNAR	3	3	4	9	186	3
BNAR	4	4	4	9	137	4
BNAR	5	5	4	9	123	5
BNAR	6	6	4	9	121	6
BNAR	7	7	4	9	155	7
BNAR	8	8	4	9	131	8
BNAR	9	9	4	9	136	9
BNAT	2	2	3	5	166	2
BNAT	3	3	3	5	146	3
BNAT	4	4	3	5	137	4
BNAT	5	5	3	5	130	5
BPAL	2	2	4	6	164	2
BPAL	3	3	4	6	146	3
BPAL	4	4	4	6	137	4
BPAL	5	5	4	6	149	5
BPAL	6	6	4	6	134	6
BPAZ	3	3	3	6	144	3
BPAZ	4	4	3	6	141	4
BPAZ	5	5	3	6	142	5
BSAT	1	1	4	11	170	1
BSAT	3	3	4	11	179	3
BSAT	4	4	4	11	135	4
BSAT	5	5	4	11	130	5
BSAT	6	6	4	11	125	6
BSAT	7	7	4	11	120	7
BSAT	8	8	4	11	126	8
BSAT	9	9	4	11	118	9
BSAT	10	10	4	11	186	10
BSAT	11	11	4	11	127	11
BSAW	3	3	4	8	149	3
BSAW	4	4	4	8	137	4
BSAW	5	5	4	8	191	5
BSAW	6	6	4	8	114	6
BSAW	7	7	4	8	131	7
BSAW	8	8	4	8	98	8
DLAV	10	3	4	4	175	3
DLAV	11	4	4	4	157	4
DPAM	9	2	3	4	153	2
DPAM	10	3	3	4	143	3
DPAM	11	4	3	4	115	4
DXAS	10	3	3	4	137	3
DXAS	11	4	3	4	183	4
E373	6	5	6	9	125	5
E373	7	6	6	9	148	6
E373	8	7	6	9	182	7
E373	9	8	6	9	125	8
E373	10	9	6	9	129	9
PH0	5	7	4	9	183	7
PH0	6	8	4	9	140	8
PH0	7	9	4	9	141	9
RT0	6	8	7	12	154	8
RT0	7	9	7	12	120	9
RT0	8	10	7	12	147	10
RT0	9	11	7	12	130	11
RT0	10	12	7	12	121	12

## Sheet: table 1 lower right panel
identity	jaar	age	α	ω	arrival date	ageclass
AAAX	1	3	3	4	146	3
ABAR	2	4	4	11	137	4
ACAJ	2	4	4	8	159	4
ACAL	1	3	3	5	104	3
ADAV	3	5	5	5	116	5
ADAW	2	4	4	5	180	4
AFAF	2	4	4	7	144	4
AFAN	2	4	4	9	135	4
AFAW	2	4	4	8	135	4
AGAB	2	4	4	6	19	4
AGAH	2	4	4	5	141	4
AHAH	3	5	5	5	116	5
AHAJ	1	3	3	6	139	3
AHAL	2	4	4	7	144	4
AHAZ	2	4	4	8	157	4
AJAD	3	5	5	9	123	5
AJAK	3	5	5	9	151	5
ALAJ	3	5	5	5	156	5
ALAP	3	5	5	7	123	5
AMAD	3	5	5	9	156	5
AMAK	2	4	4	10	144	4
ANAB	3	5	5	11	109	5
ANAS	2	4	4	8	141	4
ANAW	2	4	4	5	135	4
APAH	1	3	3	4	139	3
APAU	2	4	4	6	141	4
ARAH	3	5	5	9	144	5
AUAA	2	4	4	9	141	4
AUAV	3	5	5	11	102	5
AWAF	2	4	4	9	145	4
AWAN	3	5	5	8	130	5
AWAU	2	4	4	7	153	4
AXAG	1	3	3	7	139	3
BAAG	1	3	3	6	146	3
BAAK	2	4	4	11	137	4
BBAB	1	3	3	9	125	3
BBAT	3	5	5	9	116	5
BBAY	3	5	5	6	142	5
BCAR	1	3	3	3	153	3
BDAP	2	4	4	7	135	4
BDAU	3	5	5	6	123	5
BJAZ	3	5	5	9	130	5
BKAA	1	3	3	4	149	3
BKAN	2	4	4	5	137	4
BKAX	1	3	3	6	151	3
BLAH	2	4	4	10	141	4
BLAN	4	6	6	6	156	6
BMAA	1	3	3	5	125	3
BMAT	2	4	4	9	144	4
BNAC	1	3	3	8	146	3
BNAR	2	4	4	9	137	4
BNAT	1	3	3	5	146	3
BPAL	2	4	4	6	137	4
BPAZ	1	3	3	6	144	3
BSAT	2	4	4	11	135	4
BSAW	2	4	4	8	137	4
DLAV	9	4	4	4	157	4
DPAM	8	3	3	4	143	3
DXAS	8	3	3	4	137	3
E373	5	6	6	9	148	6
AAAX	2	4	3	4	144	4
ABAD	3	5	4	7	144	5
ABAD	4	6	4	7	127	6
ABAD	5	7	4	7	120	7
ABAR	3	5	4	11	116	5
ABAR	4	6	4	11	134	6
ABAR	5	7	4	11	120	7
ABAR	6	8	4	11	125	8
ABAR	7	9	4	11	122	9
ABAR	8	10	4	11	109	10
ABAR	9	11	4	11	113	11
ABAZ	5	7	6	9	118	7
ABAZ	6	8	6	9	147	8
ACAJ	3	5	4	8	123	5
ACAJ	4	6	4	8	114	6
ACAJ	5	7	4	8	120	7
ACAJ	6	8	4	8	98	8
ACAL	2	4	3	5	96	4
ACAL	3	5	3	5	109	5
ADAW	3	5	4	5	130	5
AFAF	3	5	4	7	137	5
AFAF	4	6	4	7	133	6
AFAF	5	7	4	7	141	7
AFAN	3	5	4	9	123	5
AFAN	4	6	4	9	114	6
AFAN	5	7	4	9	78	7
AFAN	6	8	4	9	96	8
AFAW	3	5	4	8	116	5
AFAW	4	6	4	8	107	6
AFAW	5	7	4	8	106	7
AFAW	6	8	4	8	147	8
AGAB	3	5	4	6	102	5
AGAB	4	6	4	6	79	6
AGAH	3	5	4	5	144	5
AHAJ	2	4	3	6	141	4
AHAJ	3	5	3	6	142	5
AHAJ	4	6	3	6	140	6
AHAL	3	5	4	7	130	5
AHAL	4	6	4	7	128	6
AHAL	5	7	4	7	155	7
AHAZ	3	5	4	8	149	5
AHAZ	4	6	4	8	142	6
AHAZ	5	7	4	8	153	7
AJAD	4	6	5	9	111	6
AJAD	5	7	5	9	120	7
AJAD	6	8	5	9	105	8
AJAD	7	9	5	9	118	9
AJAH	3	5	4	7	116	5
AJAH	4	6	4	7	127	6
AJAH	5	7	4	7	120	7
AJAK	4	6	5	9	125	6
AJAK	5	7	5	9	141	7
AJAK	6	8	5	9	125	8
AJAK	7	9	5	9	102	9
ALAP	4	6	5	7	114	6
ALAP	5	7	5	7	139	7
AMAD	4	6	5	9	114	6
AMAD	5	7	5	9	141	7
AMAD	6	8	5	9	105	8
AMAD	7	9	5	9	123	9
AMAK	3	5	4	10	116	5
AMAK	4	6	4	10	127	6
AMAK	5	7	4	10	139	7
AMAK	6	8	4	10	126	8
AMAK	7	9	4	10	132	9
AMAK	8	10	4	10	102	10
ANAB	4	6	5	11	111	6
ANAB	5	7	5	11	99	7
ANAB	7	9	5	11	104	9
ANAB	8	10	5	11	151	10
ANAB	9	11	5	11	127	11
ANAD	5	7	5	8	118	7
ANAD	6	8	5	8	161	8
ANAS	3	5	4	8	102	5
ANAS	4	6	4	8	65	6
ANAS	5	7	4	8	78	7
ANAS	6	8	4	8	77	8
ANAW	3	5	4	5	130	5
APAH	2	4	3	4	134	4
APAU	3	5	4	6	137	5
APAU	4	6	4	6	118	6
ARAH	4	6	5	9	156	6
ARAH	5	7	5	9	159	7
ARAH	6	8	5	9	140	8
ARAH	7	9	5	9	136	9
AUAA	3	5	4	9	137	5
AUAA	4	6	4	9	127	6
AUAA	5	7	4	9	127	7
AUAV	4	6	5	11	107	6
AUAV	5	7	5	11	120	7
AUAV	6	8	5	11	105	8
AUAV	7	9	5	11	97	9
AUAV	8	10	5	11	100	10
AUAV	9	11	5	11	94	11
AWAF	3	5	4	9	137	5
AWAF	4	6	4	9	133	6
AWAF	5	7	4	9	132	7
AWAF	6	8	4	9	126	8
AWAN	4	6	5	8	127	6
AWAN	5	7	5	8	125	7
AWAN	6	8	5	8	117	8
AWAU	3	5	4	7	137	5
AWAU	4	6	4	7	134	6
AWAU	5	7	4	7	173	7
AXAG	2	4	3	7	135	4
AXAG	3	5	3	7	116	5
AXAG	4	6	3	7	107	6
AXAG	5	7	3	7	118	7
BAAG	2	4	3	6	137	4
BAAG	3	5	3	6	130	5
BAAG	4	6	3	6	121	6
BAAK	3	5	4	11	102	5
BAAK	4	6	4	11	107	6
BAAK	5	7	4	11	15	7
BAAK	6	8	4	11	84	8
BAAK	7	9	4	11	97	9
BAAK	8	10	4	11	102	10
BAAK	9	11	4	11	94	11
BBAB	2	4	3	9	141	4
BBAB	3	5	3	9	116	5
BBAB	4	6	3	9	100	6
BBAB	5	7	3	9	97	7
BBAB	6	8	3	9	96	8
BBAB	7	9	3	9	116	9
BBAT	4	6	5	9	121	6
BBAT	5	7	5	9	99	7
BBAT	6	8	5	9	145	8
BBAT	7	9	5	9	104	9
BBAY	4	6	5	6	128	6
BDAP	3	5	4	7	123	5
BDAP	4	6	4	7	107	6
BDAP	5	7	4	7	132	7
BDAU	4	6	5	6	118	6
BJAZ	4	6	5	9	121	6
BJAZ	5	7	5	9	120	7
BJAZ	6	8	5	9	145	8
BJAZ	7	9	5	9	137	9
BKAA	2	4	3	4	137	4
BKAN	3	5	4	5	123	5
BKAX	2	4	3	6	141	4
BKAX	3	5	3	6	127	5
BKAX	4	6	3	6	114	6
BLAH	3	5	4	10	156	5
BLAH	4	6	4	10	121	6
BLAH	5	7	4	10	120	7
BLAH	6	8	4	10	126	8
BLAH	7	9	4	10	111	9
BLAH	8	10	4	10	116	10
BMAA	2	4	3	5	135	4
BMAA	3	5	3	5	130	5
BMAT	3	5	4	9	149	5
BMAT	4	6	4	9	125	6
BMAT	5	7	4	9	125	7
BMAT	6	8	4	9	105	8
BNAC	2	4	3	8	141	4
BNAC	3	5	3	8	116	5
BNAC	4	6	3	8	111	6
BNAC	5	7	3	8	104	7
BNAC	6	8	3	8	98	8
BNAR	3	5	4	9	123	5
BNAR	4	6	4	9	121	6
BNAR	5	7	4	9	155	7
BNAR	6	8	4	9	131	8
BNAR	7	9	4	9	136	9
BNAT	2	4	3	5	137	4
BNAT	3	5	3	5	130	5
BPAL	3	5	4	6	149	5
BPAL	4	6	4	6	134	6
BPAZ	2	4	3	6	141	4
BPAZ	3	5	3	6	142	5
BSAT	3	5	4	11	130	5
BSAT	4	6	4	11	125	6
BSAT	5	7	4	11	120	7
BSAT	6	8	4	11	126	8
BSAT	7	9	4	11	118	9
BSAT	8	10	4	11	186	10
BSAT	9	11	4	11	127	11
BSAW	3	5	4	8	191	5
BSAW	4	6	4	8	114	6
BSAW	5	7	4	8	131	7
BSAW	6	8	4	8	98	8
DPAM	9	4	3	4	115	4
DXAS	9	4	3	4	183	4
E373	6	7	6	9	182	7
E373	7	8	6	9	125	8
E373	8	9	6	9	129	9
PH0	3	7	4	9	183	7
PH0	4	8	4	9	140	8
PH0	5	9	4	9	141	9
RT0	4	8	7	12	154	8
RT0	5	9	7	12	120	9
RT0	6	10	7	12	147	10
RT0	7	11	7	12	130	11
RT0	8	12	7	12	121	12

## Sheet: table 2 upper left panel
identity	year	age	α	arrival date	ageclass
AAAX	3	2	3	215	2
AAAX	4	3	3	146	3
AAAX	5	4	3	144	4
AAAZ	2	1	3	176	1
AAAZ	4	3	3	132	3
AAAZ	5	4	3	96	4
AAAZ	6	5	3	109	5
AAAZ	7	6	3	107	6
AAAZ	8	7	3	120	7
AAAZ	9	8	3	147	8
AAAZ	10	9	3	104	9
ABAD	4	3	4	161	3
ABAD	6	5	4	144	5
ABAD	7	6	4	127	6
ABAD	8	7	4	120	7
ABAJ	3	2	4	140	2
ABAJ	4	3	4	151	3
ABAJ	5	4	4	134	4
ABAJ	6	5	4	116	5
ABAJ	7	6	4	79	6
ABAJ	8	7	4	132	7
ABAJ	9	8	4	126	8
ABAJ	10	9	4	90	9
ABAJ	11	10	4	200	10
ABAJ	12	11	4	93	11
ABAJ	13	12	4	182	12
ABAR	3	2	4	166	2
ABAR	4	3	4	146	3
ABAR	5	4	4	137	4
ABAR	6	5	4	116	5
ABAR	7	6	4	134	6
ABAR	8	7	4	120	7
ABAR	9	8	4	125	8
ABAR	10	9	4	122	9
ABAR	11	10	4	109	10
ABAR	12	11	4	113	11
ABAZ	3	2	6	201	2
ABAZ	4	3	6	146	3
ABAZ	5	4	6	141	4
ABAZ	8	7	6	118	7
ABAZ	9	8	6	147	8
ACAJ	3	2	4	166	2
ACAJ	4	3	4	165	3
ACAJ	5	4	4	159	4
ACAJ	6	5	4	123	5
ACAJ	7	6	4	114	6
ACAJ	8	7	4	120	7
ACAJ	9	8	4	98	8
ACAL	3	2	3	199	2
ACAL	4	3	3	104	3
ACAL	5	4	3	96	4
ACAL	6	5	3	109	5
ADAF	3	2	4	166	2
ADAF	4	3	4	156	3
ADAF	5	4	4	157	4
ADAF	6	5	4	137	5
ADAF	7	6	4	127	6
ADAF	8	7	4	120	7
ADAF	9	8	4	125	8
ADAF	10	9	4	118	9
ADAF	11	10	4	114	10
ADAF	13	12	4	114	12
ADAF	14	13	4	141	13
ADAV	3	2	5	180	2
ADAV	5	4	5	135	4
ADAV	6	5	5	116	5
ADAW	3	2	4	199	2
ADAW	4	3	4	139	3
ADAW	5	4	4	180	4
ADAW	6	5	4	130	5
AFAF	4	3	4	161	3
AFAF	5	4	4	144	4
AFAF	6	5	4	137	5
AFAF	7	6	4	133	6
AFAF	8	7	4	141	7
AFAN	3	2	4	126	2
AFAN	4	3	4	111	3
AFAN	5	4	4	135	4
AFAN	6	5	4	123	5
AFAN	7	6	4	114	6
AFAN	8	7	4	78	7
AFAN	9	8	4	96	8
AFAP	3	2	4	203	2
AFAP	4	3	4	153	3
AFAP	5	4	4	144	4
AFAP	6	5	4	109	5
AFAP	7	6	4	111	6
AFAP	8	7	4	120	7
AFAP	9	8	4	117	8
AFAP	11	10	4	186	10
AFAP	13	12	4	149	12
AFAP	14	13	4	194	13
AFAR	6	5	5	207	5
AFAR	7	6	5	142	6
AFAR	8	7	5	141	7
AFAR	9	8	5	138	8
AFAR	10	9	5	146	9
AFAR	11	10	5	143	10
AFAR	13	12	5	142	12
AFAR	14	13	5	155	13
AFAS	3	2	4	206	2
AFAS	4	3	4	118	3
AFAS	5	4	4	82	4
AFAS	6	5	4	109	5
AFAS	7	6	4	118	6
AFAS	8	7	4	141	7
AFAS	9	8	4	117	8
AFAS	10	9	4	111	9
AFAS	11	10	4	99	10
AFAS	12	11	4	120	11
AFAS	13	12	4	135	12
AFAS	14	13	4	148	13
AFAW	3	2	4	201	2
AFAW	4	3	4	153	3
AFAW	5	4	4	135	4
AFAW	6	5	4	116	5
AFAW	7	6	4	107	6
AFAW	8	7	4	106	7
AFAW	9	8	4	147	8
AGAB	4	3	4	161	3
AGAB	5	4	4	19	4
AGAB	6	5	4	102	5
AGAB	7	6	4	79	6
AGAG	4	3	4	207	3
AGAG	5	4	4	137	4
AGAG	6	5	4	130	5
AGAG	7	6	4	134	6
AGAG	8	7	4	120	7
AGAG	9	8	4	147	8
AGAG	10	9	4	159	9
AGAG	11	10	4	116	10
AGAG	12	11	4	114	11
AGAG	13	12	4	133	12
AGAG	14	13	4	118	13
AGAH	3	2	4	180	2
AGAH	4	3	4	132	3
AGAH	5	4	4	141	4
AGAH	6	5	4	144	5
AHAH	4	3	5	111	3
AHAH	5	4	5	137	4
AHAH	6	5	5	116	5
AHAJ	3	2	3	164	2
AHAJ	4	3	3	139	3
AHAJ	5	4	3	141	4
AHAJ	6	5	3	142	5
AHAJ	7	6	3	140	6
AHAL	3	2	4	166	2
AHAL	4	3	4	158	3
AHAL	5	4	4	144	4
AHAL	6	5	4	130	5
AHAL	7	6	4	128	6
AHAL	8	7	4	155	7
AHAS	3	2	4	145	2
AHAS	4	3	4	149	3
AHAS	5	4	4	159	4
AHAS	6	5	4	137	5
AHAS	7	6	4	149	6
AHAS	8	7	4	132	7
AHAS	9	8	4	152	8
AHAS	10	9	4	125	9
AHAS	11	10	4	116	10
AHAS	13	12	4	114	12
AHAW	3	2	4	194	2
AHAW	4	3	4	151	3
AHAW	5	4	4	131	4
AHAW	6	5	4	130	5
AHAW	7	6	4	118	6
AHAW	8	7	4	159	7
AHAW	9	8	4	147	8
AHAZ	3	2	4	201	2
AHAZ	4	3	4	160	3
AHAZ	5	4	4	157	4
AHAZ	6	5	4	149	5
AHAZ	7	6	4	142	6
AHAZ	8	7	4	153	7
AJAA	3	2	5	180	2
AJAA	4	3	5	165	3
AJAA	6	5	5	137	5
AJAA	7	6	5	135	6
AJAA	8	7	5	132	7
AJAA	9	8	5	167	8
AJAA	10	9	5	132	9
AJAA	11	10	5	129	10
AJAA	12	11	5	197	11
AJAA	13	12	5	149	12
AJAA	14	13	5	141	13
AJAD	4	3	5	144	3
AJAD	5	4	5	137	4
AJAD	6	5	5	123	5
AJAD	7	6	5	111	6
AJAD	8	7	5	120	7
AJAD	9	8	5	105	8
AJAD	10	9	5	118	9
AJAH	4	3	4	149	3
AJAH	6	5	4	116	5
AJAH	7	6	4	127	6
AJAH	8	7	4	120	7
AJAJ	3	2	4	194	2
AJAJ	4	3	4	146	3
AJAJ	5	4	4	144	4
AJAJ	6	5	4	130	5
AJAJ	9	8	4	201	8
AJAJ	10	9	4	125	9
AJAJ	11	10	4	116	10
AJAJ	12	11	4	115	11
AJAJ	13	12	4	142	12
AJAJ	14	13	4	148	13
AJAK	3	2	5	147	2
AJAK	4	3	5	139	3
AJAK	5	4	5	137	4
AJAK	6	5	5	151	5
AJAK	7	6	5	125	6
AJAK	8	7	5	141	7
AJAK	9	8	5	125	8
AJAK	10	9	5	102	9
ALAJ	6	5	5	156	5
ALAK	3	2	3	201	2
ALAK	4	3	3	160	3
ALAK	5	4	3	144	4
ALAK	6	5	3	109	5
ALAK	7	6	3	107	6
ALAK	8	7	3	85	7
ALAK	9	8	3	98	8
ALAK	11	10	3	102	10
ALAK	12	11	3	168	11
ALAK	13	12	3	156	12
ALAK	14	13	3	113	13
ALAP	3	2	5	168	2
ALAP	4	3	5	172	3
ALAP	5	4	5	137	4
ALAP	6	5	5	123	5
ALAP	7	6	5	114	6
ALAP	8	7	5	139	7
AMAD	4	3	5	181	3
AMAD	5	4	5	143	4
AMAD	6	5	5	156	5
AMAD	7	6	5	114	6
AMAD	8	7	5	141	7
AMAD	9	8	5	105	8
AMAD	10	9	5	123	9
AMAK	3	2	4	119	2
AMAK	4	3	4	151	3
AMAK	5	4	4	144	4
AMAK	6	5	4	116	5
AMAK	7	6	4	127	6
AMAK	8	7	4	139	7
AMAK	9	8	4	126	8
AMAK	10	9	4	132	9
AMAK	11	10	4	102	10
AMAL	3	2	4	173	2
AMAL	4	3	4	151	3
AMAL	5	4	4	137	4
AMAL	6	5	4	130	5
AMAL	7	6	4	149	6
AMAL	8	7	4	127	7
AMAL	9	8	4	126	8
AMAL	10	9	4	111	9
AMAL	11	10	4	129	10
AMAL	12	11	4	114	11
AMAL	13	12	4	114	12
AMAL	14	13	4	104	13
AMAX	3	2	4	14	2
AMAX	4	3	4	104	3
AMAX	5	4	4	135	4
AMAX	6	5	4	116	5
AMAX	7	6	4	100	6
AMAX	8	7	4	132	7
AMAX	9	8	4	103	8
AMAX	10	9	4	116	9
AMAX	11	10	4	102	10
AMAX	12	11	4	86	11
ANAB	3	2	5	182	2
ANAB	4	3	5	132	3
ANAB	5	4	5	141	4
ANAB	6	5	5	109	5
ANAB	7	6	5	111	6
ANAB	8	7	5	99	7
ANAB	10	9	5	104	9
ANAB	11	10	5	151	10
ANAB	12	11	5	127	11
ANAD	8	7	5	118	7
ANAD	9	8	5	161	8
ANAN	3	2	4	215	2
ANAN	4	3	4	153	3
ANAN	5	4	4	134	4
ANAN	6	5	4	116	5
ANAN	7	6	4	121	6
ANAN	8	7	4	120	7
ANAN	9	8	4	98	8
ANAN	10	9	4	71	9
ANAN	11	10	4	102	10
ANAN	12	11	4	94	11
ANAN	13	12	4	149	12
ANAN	14	13	4	113	13
ANAS	4	3	4	153	3
ANAS	5	4	4	141	4
ANAS	6	5	4	102	5
ANAS	7	6	4	65	6
ANAS	8	7	4	78	7
ANAS	9	8	4	77	8
ANAW	3	2	4	147	2
ANAW	4	3	4	146	3
ANAW	5	4	4	135	4
ANAW	6	5	4	130	5
APAH	3	2	3	175	2
APAH	4	3	3	139	3
APAH	5	4	3	134	4
APAU	3	2	4	166	2
APAU	4	3	4	146	3
APAU	5	4	4	141	4
APAU	6	5	4	137	5
APAU	7	6	4	118	6
ARAH	3	2	5	196	2
ARAH	4	3	5	160	3
ARAH	6	5	5	144	5
ARAH	7	6	5	156	6
ARAH	8	7	5	159	7
ARAH	9	8	5	140	8
ARAH	10	9	5	136	9
ASAH	3	2	4	182	2
ASAH	4	3	4	149	3
ASAH	5	4	4	135	4
ASAH	6	5	4	130	5
ASAH	7	6	4	128	6
ASAH	8	7	4	120	7
ASAH	9	8	4	147	8
ASAH	10	9	4	146	9
ASAH	11	10	4	129	10
ASAH	12	11	4	115	11
ASAH	13	12	4	135	12
ASAH	14	13	4	134	13
ASAP	3	2	3	194	2
ASAP	4	3	3	149	3
ASAP	5	4	3	135	4
ASAP	6	5	3	130	5
ASAP	7	6	3	114	6
ASAP	8	7	3	120	7
ASAP	9	8	3	117	8
ASAP	10	9	3	122	9
ASAP	11	10	3	123	10
ASAP	12	11	3	115	11
ASAP	13	12	3	128	12
ASAP	14	13	3	120	13
ASAX	3	2	3	182	2
ASAX	4	3	3	146	3
ASAX	5	4	3	137	4
ASAX	6	5	3	137	5
ASAX	7	6	3	135	6
ASAX	8	7	3	139	7
ASAX	9	8	3	131	8
ASAX	10	9	3	125	9
ASAX	11	10	3	109	10
ASAX	12	11	3	114	11
ASAX	13	12	3	146	12
ASAX	14	13	3	134	13
ASAY	3	2	5	166	2
ASAY	4	3	5	158	3
ASAY	5	4	5	141	4
ASAY	6	5	5	137	5
ASAY	7	6	5	121	6
ASAY	8	7	5	120	7
ASAY	9	8	5	131	8
ASAY	10	9	5	125	9
ASAY	11	10	5	135	10
ASAY	12	11	5	114	11
ASAY	13	12	5	126	12
AUAA	3	2	4	206	2
AUAA	4	3	4	149	3
AUAA	5	4	4	141	4
AUAA	6	5	4	137	5
AUAA	7	6	4	127	6
AUAA	8	7	4	127	7
AUAP	3	2	4	187	2
AUAP	4	3	4	146	3
AUAP	5	4	4	141	4
AUAP	6	5	4	130	5
AUAP	7	6	4	135	6
AUAP	8	7	4	120	7
AUAP	9	8	4	145	8
AUAP	10	9	4	125	9
AUAP	11	10	4	129	10
AUAP	12	11	4	108	11
AUAP	13	12	4	112	12
AUAP	14	13	4	132	13
AUAV	2	1	5	129	1
AUAV	4	3	5	177	3
AUAV	5	4	5	137	4
AUAV	6	5	5	102	5
AUAV	7	6	5	107	6
AUAV	8	7	5	120	7
AUAV	9	8	5	105	8
AUAV	10	9	5	97	9
AUAV	11	10	5	100	10
AUAV	12	11	5	94	11
AWAF	4	3	4	174	3
AWAF	5	4	4	145	4
AWAF	6	5	4	137	5
AWAF	7	6	4	133	6
AWAF	8	7	4	132	7
AWAF	9	8	4	126	8
AWAN	4	3	5	207	3
AWAN	5	4	5	141	4
AWAN	6	5	5	130	5
AWAN	7	6	5	127	6
AWAN	8	7	5	125	7
AWAN	9	8	5	117	8
AWAR	3	2	3	173	2
AWAR	4	3	3	139	3
AWAR	5	4	3	137	4
AWAR	8	7	3	182	7
AWAR	9	8	3	96	8
AWAR	10	9	3	83	9
AWAR	11	10	3	113	10
AWAR	12	11	3	94	11
AWAR	13	12	3	112	12
AWAR	14	13	3	120	13
AWAU	3	2	4	166	2
AWAU	4	3	4	146	3
AWAU	5	4	4	153	4
AWAU	6	5	4	137	5
AWAU	7	6	4	134	6
AWAU	8	7	4	173	7
AXAG	4	3	3	139	3
AXAG	5	4	3	135	4
AXAG	6	5	3	116	5
AXAG	7	6	3	107	6
AXAG	8	7	3	118	7
BAAG	3	2	3	192	2
BAAG	4	3	3	146	3
BAAG	5	4	3	137	4
BAAG	6	5	3	130	5
BAAG	7	6	3	121	6
BAAK	3	2	4	166	2
BAAK	4	3	4	156	3
BAAK	5	4	4	137	4
BAAK	6	5	4	102	5
BAAK	7	6	4	107	6
BAAK	8	7	4	15	7
BAAK	9	8	4	84	8
BAAK	10	9	4	97	9
BAAK	11	10	4	102	10
BAAK	12	11	4	94	11
BBAB	4	3	3	125	3
BBAB	5	4	3	141	4
BBAB	6	5	3	116	5
BBAB	7	6	3	100	6
BBAB	8	7	3	97	7
BBAB	9	8	3	96	8
BBAB	10	9	3	116	9
BBAF	5	4	4	153	4
BBAF	6	5	4	137	5
BBAF	7	6	4	128	6
BBAF	8	7	4	168	7
BBAF	9	8	4	140	8
BBAF	10	9	4	129	9
BBAF	11	10	4	121	10
BBAF	12	11	4	166	11
BBAF	13	12	4	133	12
BBAF	14	13	4	132	13
BBAT	4	3	5	167	3
BBAT	5	4	5	141	4
BBAT	6	5	5	116	5
BBAT	7	6	5	121	6
BBAT	8	7	5	99	7
BBAT	9	8	5	145	8
BBAT	10	9	5	104	9
BBAX	6	5	4	123	5
BBAX	7	6	4	111	6
BBAX	8	7	4	141	7
BBAX	9	8	4	112	8
BBAX	10	9	4	102	9
BBAX	11	10	4	116	10
BBAX	12	11	4	86	11
BBAX	13	12	4	114	12
BBAY	4	3	5	177	3
BBAY	5	4	5	143	4
BBAY	6	5	5	142	5
BBAY	7	6	5	128	6
BCAR	3	2	3	216	2
BCAR	4	3	3	153	3
BDAN	4	3	5	151	3
BDAN	5	4	5	135	4
BDAN	6	5	5	123	5
BDAN	7	6	5	121	6
BDAN	8	7	5	139	7
BDAN	9	8	5	145	8
BDAN	10	9	5	104	9
BDAN	11	10	5	106	10
BDAN	12	11	5	92	11
BDAN	13	12	5	126	12
BDAP	3	2	4	185	2
BDAP	4	3	4	140	3
BDAP	5	4	4	135	4
BDAP	6	5	4	123	5
BDAP	7	6	4	107	6
BDAP	8	7	4	132	7
BDAU	3	2	5	220	2
BDAU	4	3	5	146	3
BDAU	5	4	5	135	4
BDAU	6	5	5	123	5
BDAU	7	6	5	118	6
BJAA	3	2	4	203	2
BJAA	4	3	4	173	3
BJAA	5	4	4	144	4
BJAA	6	5	4	130	5
BJAA	7	6	4	128	6
BJAA	8	7	4	120	7
BJAA	9	8	4	147	8
BJAA	10	9	4	167	9
BJAA	11	10	4	113	10
BJAA	12	11	4	114	11
BJAA	13	12	4	126	12
BJAA	14	13	4	132	13
BJAZ	3	2	5	182	2
BJAZ	4	3	5	149	3
BJAZ	6	5	5	130	5
BJAZ	7	6	5	121	6
BJAZ	8	7	5	120	7
BJAZ	9	8	5	145	8
BJAZ	10	9	5	137	9
BKAA	3	2	3	194	2
BKAA	4	3	3	149	3
BKAA	5	4	3	137	4
BKAN	4	3	4	165	3
BKAN	5	4	4	137	4
BKAN	6	5	4	123	5
BKAX	3	2	3	192	2
BKAX	4	3	3	151	3
BKAX	5	4	3	141	4
BKAX	6	5	3	127	5
BKAX	7	6	3	114	6
BLAD	3	2	4	216	2
BLAD	4	3	4	149	3
BLAD	5	4	4	137	4
BLAD	6	5	4	116	5
BLAD	7	6	4	135	6
BLAD	8	7	4	120	7
BLAD	9	8	4	125	8
BLAD	10	9	4	109	9
BLAD	11	10	4	109	10
BLAD	12	11	4	114	11
BLAD	13	12	4	128	12
BLAD	14	13	4	120	13
BLAH	3	2	4	178	2
BLAH	4	3	4	161	3
BLAH	5	4	4	141	4
BLAH	6	5	4	156	5
BLAH	7	6	4	121	6
BLAH	8	7	4	120	7
BLAH	9	8	4	126	8
BLAH	10	9	4	111	9
BLAH	11	10	4	116	10
BLAN	3	2	6	201	2
BLAN	4	3	6	167	3
BLAN	7	6	6	156	6
BLAR	4	3	4	165	3
BLAR	5	4	4	143	4
BLAR	6	5	4	149	5
BLAR	7	6	4	134	6
BLAR	8	7	4	139	7
BLAR	9	8	4	138	8
BLAR	10	9	4	125	9
BLAR	11	10	4	135	10
BLAR	12	11	4	122	11
BLAR	13	12	4	125	12
BLAR	14	13	4	120	13
BMAA	4	3	3	125	3
BMAA	5	4	3	135	4
BMAA	6	5	3	130	5
BMAN	4	3	5	205	3
BMAN	5	4	5	137	4
BMAN	6	5	5	137	5
BMAN	7	6	5	121	6
BMAN	8	7	5	132	7
BMAN	9	8	5	138	8
BMAN	10	9	5	123	9
BMAN	11	10	5	116	10
BMAN	12	11	5	120	11
BMAN	13	12	5	128	12
BMAN	14	13	5	127	13
BMAT	3	2	4	192	2
BMAT	5	4	4	144	4
BMAT	6	5	4	149	5
BMAT	7	6	4	125	6
BMAT	8	7	4	125	7
BMAT	9	8	4	105	8
BNAC	3	2	3	196	2
BNAC	4	3	3	146	3
BNAC	5	4	3	141	4
BNAC	6	5	3	116	5
BNAC	7	6	3	111	6
BNAC	8	7	3	104	7
BNAC	9	8	3	98	8
BNAH	3	2	4	194	2
BNAH	4	3	4	178	3
BNAH	5	4	4	144	4
BNAH	6	5	4	130	5
BNAH	7	6	4	121	6
BNAH	8	7	4	160	7
BNAH	9	8	4	167	8
BNAH	10	9	4	153	9
BNAH	11	10	4	163	10
BNAH	13	12	4	182	12
BNAH	14	13	4	182	13
BNAR	3	2	4	187	2
BNAR	4	3	4	186	3
BNAR	5	4	4	137	4
BNAR	6	5	4	123	5
BNAR	7	6	4	121	6
BNAR	8	7	4	155	7
BNAR	9	8	4	131	8
BNAR	10	9	4	136	9
BNAT	3	2	3	166	2
BNAT	4	3	3	146	3
BNAT	5	4	3	137	4
BNAT	6	5	3	130	5
BPAL	3	2	4	164	2
BPAL	4	3	4	146	3
BPAL	5	4	4	137	4
BPAL	6	5	4	149	5
BPAL	7	6	4	134	6
BPAZ	4	3	3	144	3
BPAZ	5	4	3	141	4
BPAZ	6	5	3	142	5
BSAL	3	2	5	168	2
BSAL	4	3	5	156	3
BSAL	5	4	5	144	4
BSAL	6	5	5	144	5
BSAL	7	6	5	114	6
BSAL	8	7	5	106	7
BSAL	9	8	5	98	8
BSAL	10	9	5	132	9
BSAL	11	10	5	113	10
BSAL	12	11	5	66	11
BSAL	13	12	5	105	12
BSAL	14	13	5	127	13
BSAT	2	1	4	170	1
BSAT	4	3	4	179	3
BSAT	5	4	4	135	4
BSAT	6	5	4	130	5
BSAT	7	6	4	125	6
BSAT	8	7	4	120	7
BSAT	9	8	4	126	8
BSAT	10	9	4	118	9
BSAT	11	10	4	186	10
BSAT	12	11	4	127	11
BSAW	4	3	4	149	3
BSAW	5	4	4	137	4
BSAW	6	5	4	191	5
BSAW	7	6	4	114	6
BSAW	8	7	4	131	7
BSAW	9	8	4	98	8
BSAY	4	3	4	149	3
BSAY	5	4	4	137	4
BSAY	6	5	4	116	5
BSAY	7	6	4	107	6
BSAY	8	7	4	120	7
BSAY	9	8	4	105	8
BSAY	10	9	4	102	9
BSAY	11	10	4	113	10
BSAY	12	11	4	115	11
BSAY	13	12	4	142	12
BSAY	14	13	4	141	13
BTAF	4	3	4	153	3
BTAF	5	4	4	134	4
BTAF	6	5	4	142	5
BTAF	7	6	4	125	6
BTAF	8	7	4	131	7
BTAF	9	8	4	125	8
BTAF	10	9	4	125	9
BTAF	11	10	4	123	10
BTAF	12	11	4	122	11
BTAF	13	12	4	121	12
BTAF	14	13	4	120	13
BTAG	3	2	5	171	2
BTAG	4	3	5	153	3
BTAG	7	6	5	142	6
BTAG	8	7	5	120	7
BTAG	9	8	5	126	8
BTAG	12	11	5	127	11
BTAG	13	12	5	156	12
BTAG	14	13	5	155	13
BTAX	4	3	4	160	3
BTAX	5	4	4	137	4
BTAX	6	5	4	137	5
BTAX	7	6	4	121	6
BTAX	8	7	4	120	7
BTAX	9	8	4	133	8
BTAX	10	9	4	118	9
BTAX	11	10	4	113	10
BTAX	12	11	4	108	11
BTAX	13	12	4	128	12
BTAX	14	13	4	113	13
DFAF	11	3	4	213	3
DFAF	12	4	4	126	4
DFAF	13	5	4	126	5
DFAF	14	6	4	125	6
DFAP	12	4	4	149	4
DFAP	13	5	4	155	5
DFAP	14	6	4	195	6
DLAV	11	3	4	175	3
DLAV	12	4	4	157	4
DMAC	10	2	5	115	2
DMAC	11	3	5	220	3
DMAC	12	4	5	92	4
DMAC	13	5	5	119	5
DMAJ	11	3	5	141	3
DMAJ	12	4	5	126	4
DMAJ	13	5	5	126	5
DMAU	11	3	5	143	3
DMAU	13	5	5	128	5
DMAU	14	6	5	134	6
DMAW	11	3	3	156	3
DMAW	12	4	3	157	4
DMAW	13	5	3	135	5
DMAW	14	6	3	155	6
DNAU	11	3	5	219	3
DNAU	13	5	5	114	5
DNAU	14	6	5	113	6
DPAD	13	5	5	126	5
DPAD	14	6	5	111	6
DPAK	11	3	5	205	3
DPAK	13	5	5	156	5
DPAK	14	6	5	194	6
DPAM	10	2	3	153	2
DPAM	11	3	3	143	3
DPAM	12	4	3	115	4
DPAZ	11	3	4	175	3
DPAZ	12	4	4	120	4
DPAZ	13	5	4	128	5
DPAZ	14	6	4	120	6
DRAR	12	4	4	160	4
DRAR	13	5	4	147	5
DRAR	14	6	4	153	6
DRAZ	11	3	3	200	3
DRAZ	12	4	3	141	4
DRAZ	13	5	3	135	5
DSAJ	10	2	3	123	2
DSAJ	11	3	3	121	3
DSAJ	12	4	3	106	4
DSAJ	13	5	3	112	5
DSAJ	14	6	3	83	6
DTAG	12	4	3	129	4
DTAG	13	5	3	126	5
DTAG	14	6	3	151	6
DUAB	11	3	4	127	3
DUAB	12	4	4	66	4
DUAB	13	5	4	105	5
DUAB	14	6	4	104	6
DUAD	10	2	4	214	2
DUAD	12	4	4	183	4
DUAD	13	5	4	147	5
DUAY	12	4	4	133	4
DUAY	13	5	4	119	5
DUAY	14	6	4	132	6
DVAJ	10	2	3	158	2
DVAJ	11	3	3	143	3
DVAJ	12	4	3	182	4
DVAJ	13	5	3	128	5
DVAJ	14	6	3	152	6
DVAL	14	6	6	160	6
DVAP	11	3	5	149	3
DVAP	12	4	5	134	4
DVAP	13	5	5	121	5
DVAP	14	6	5	104	6
DVAU	10	2	4	167	2
DVAU	11	3	4	123	3
DVAU	12	4	4	115	4
DVAU	13	5	4	128	5
DVAU	14	6	4	104	6
DVAY	10	2	5	193	2
DVAY	11	3	5	143	3
DVAY	12	4	5	120	4
DVAY	13	5	5	156	5
DVAY	14	6	5	127	6
DWAJ	9	1	4	194	1
DWAJ	10	2	4	153	2
DWAJ	11	3	4	123	3
DWAJ	12	4	4	115	4
DWAJ	13	5	4	142	5
DWAJ	14	6	4	141	6
DWAR	11	3	5	149	3
DWAR	12	4	5	120	4
DWAR	13	5	5	121	5
DWAS	13	5	5	135	5
DWAS	14	6	5	134	6
DWAY	11	3	5	175	3
DWAY	13	5	5	147	5
DWAY	14	6	5	151	6
DXAS	11	3	3	137	3
DXAS	12	4	3	183	4
DXAT	13	5	5	135	5
DXAT	14	6	5	148	6
DXAU	10	2	3	173	2
DXAU	11	3	3	143	3
DXAU	12	4	3	120	4
DXAU	13	5	3	142	5
DXAU	14	6	3	134	6
DXAX	11	3	3	149	3
DXAX	12	4	3	129	4
DXAX	13	5	3	140	5
DXAX	14	6	3	125	6
DYAC	12	4	4	121	4
DYAC	13	5	4	133	5
DYAC	14	6	4	125	6
DYAG	11	3	4	163	3
DYAG	12	4	4	183	4
DYAG	13	5	4	126	5
DYAG	14	6	4	104	6
DYAR	12	4	4	153	4
DYAR	13	5	4	126	5
DYAR	14	6	4	146	6
DZAK	13	5	5	112	5
DZAM	11	3	5	193	3
DZAM	13	5	5	162	5
DZAM	14	6	5	134	6
DZAX	11	3	4	171	3
DZAX	12	4	4	129	4
DZAX	13	5	4	128	5
DZAX	14	6	4	113	6
E089	7	6	4	142	6
E089	8	7	4	141	7
E089	9	8	4	138	8
E089	10	9	4	118	9
E089	11	10	4	123	10
E089	13	12	4	135	12
E089	14	13	4	127	13
E373	7	5	6	125	5
E373	8	6	6	148	6
E373	9	7	6	182	7
E373	10	8	6	125	8
E373	11	9	6	129	9
E523	10	7	7	167	7
E523	11	8	7	143	8
E523	12	9	7	127	9
E523	13	10	7	140	10
E523	14	11	7	125	11
E720	6	3	4	144	3
E720	7	4	4	127	4
E720	8	5	4	139	5
E720	9	6	4	131	6
E720	10	7	4	132	7
E720	11	8	4	123	8
E720	12	9	4	122	9
E720	13	10	4	121	10
E720	14	11	4	113	11
EA91	4	6	6	193	6
EA91	5	7	6	143	7
EA91	6	8	6	116	8
EA91	7	9	6	114	9
EA91	8	10	6	104	10
EA91	9	11	6	152	11
EA91	10	12	6	116	12
EA91	11	13	6	106	13
EL52	2	4	4	114	4
EL52	3	5	4	147	5
EL52	4	6	4	111	6
EL52	5	7	4	141	7
EL52	6	8	4	102	8
EL52	7	9	4	133	9
EL52	8	10	4	92	10
EL52	9	11	4	103	11
EL52	10	12	4	123	12
EL52	11	13	4	92	13
ES51	1	3	5	129	3
ES51	2	4	5	149	4
ES51	3	5	5	126	5
ES51	4	6	5	69	6
ES51	5	7	5	54	7
ES51	6	8	5	102	8
ES51	7	9	5	134	9
ES51	8	10	5	141	10
ES51	9	11	5	63	11
ES51	11	13	5	81	13
ET54	3	5	5	119	5
ET54	4	6	5	144	6
ET54	7	9	5	147	9
ET54	9	11	5	168	11
ET54	10	12	5	185	12
ET54	11	13	5	116	13
EU83	8	9	7	127	9
EU83	9	10	7	147	10
EU83	10	11	7	116	11
EU83	11	12	7	135	12
EU83	12	13	7	107	13
GDAP	13	4	4	170	4
GDAP	14	5	4	134	5
GDAX	11	2	4	200	2
GDAX	13	4	4	135	4
GDAX	14	5	4	113	5
GGAC	13	4	4	126	4
GGAC	14	5	4	146	5
GGAV	11	2	4	213	2
GGAV	12	3	4	121	3
GGAV	13	4	4	126	4
GGAV	14	5	4	132	5
GJAT	11	3	3	158	3
GJAT	13	5	3	140	5
GJAT	14	6	3	132	6
GKAB	11	3	5	143	3
GKAB	13	5	5	156	5
GKAB	14	6	5	120	6
GKAV	13	5	5	121	5
GKAV	14	6	5	146	6
GLAC	11	3	4	151	3
GLAC	12	4	4	183	4
GLAC	13	5	4	149	5
GLAC	14	6	4	120	6
GNAG	12	3	4	149	3
GNAG	13	4	4	133	4
GNAG	14	5	4	125	5
GNAR	12	3	4	141	3
GNAR	13	4	4	128	4
GNAR	14	5	4	120	5
GNAU	13	4	4	156	4
GNAU	14	5	4	141	5
GPAD	12	3	4	143	3
GPAD	13	4	4	161	4
GPAD	14	5	4	146	5
GPAR	12	3	4	142	3
GPAR	13	4	4	126	4
GPAR	14	5	4	132	5
GRAC	13	4	4	140	4
GRAS	13	4	4	154	4
GRAS	14	5	4	118	5
GSAN	13	4	4	121	4
GSAN	14	5	4	118	5
GSAW	12	3	4	160	3
GSAW	13	4	4	140	4
GSAW	14	5	4	132	5
GSAY	12	3	4	166	3
GSAY	13	4	4	160	4
GSAY	14	5	4	146	5
GTAJ	13	4	4	133	4
GTAJ	14	5	4	148	5
GTAK	12	3	4	156	3
GTAK	13	4	4	126	4
GTAK	14	5	4	146	5
HAAJ	13	3	3	133	3
HAAJ	14	4	3	160	4
HAAP	13	3	4	140	3
HAAP	14	4	4	146	4
HCAP	13	3	4	121	3
HCAP	14	4	4	183	4
HCAR	13	3	4	142	3
HCAR	14	4	4	148	4
HCAT	11	1	4	172	1
HCAT	13	3	4	156	3
HCAT	14	4	4	148	4
HCAU	13	3	4	183	3
HCAU	14	4	4	159	4
HDAG	14	4	4	139	4
HFAA	13	3	4	162	3
HFAA	14	4	4	146	4
HFAR	13	3	4	140	3
HFAR	14	4	4	146	4
HGAU	13	3	4	162	3
HGAU	14	4	4	146	4
HHAD	13	3	3	133	3
HJAB	14	4	4	155	4
HJAM	13	3	3	140	3
HJAM	14	4	3	139	4
HKAH	13	3	4	126	3
HKAH	14	4	4	152	4
HKAP	13	3	4	140	3
HKAP	14	4	4	139	4
HKAT	13	3	4	147	3
HKAT	14	4	4	151	4
HKAX	12	2	4	161	2
HKAX	13	3	4	161	3
HKAX	14	4	4	132	4
HLAP	13	3	4	156	3
HLAP	14	4	4	187	4
HLAU	14	4	4	146	4
HMAL	14	4	4	196	4
HMAT	13	3	3	153	3
HNAF	13	3	3	154	3
HNAF	14	4	3	132	4
HNAG	13	3	4	142	3
HNAG	14	4	4	134	4
HNAT	13	3	3	177	3
HNAT	14	4	3	148	4
HPAJ	13	3	3	128	3
HPAJ	14	4	3	120	4
HRAA	13	3	3	149	3
HRAA	14	4	3	141	4
HRAS	13	3	4	178	3
HSAJ	14	4	4	134	4
HSAL	13	3	4	176	3
HSAL	14	4	4	141	4
HSAN	13	3	3	140	3
HSAN	14	4	3	125	4
HSAZ	13	3	4	154	3
HSAZ	14	4	4	155	4
HTAS	13	3	4	168	3
HTAS	14	4	4	132	4
HUAF	13	3	4	146	3
HUAF	14	4	4	134	4
HYAR	13	3	4	140	3
HYAR	14	4	4	120	4
HZAB	13	3	3	146	3
HZAB	14	4	3	111	4
HZAD	13	3	4	119	3
HZAD	14	4	4	120	4
HZAK	14	4	4	104	4
HZAS	12	2	4	141	2
HZAS	13	3	4	114	3
HZAS	14	4	4	148	4
HZAV	13	3	4	146	3
HZAV	14	4	4	166	4
KJAJ	14	4	4	148	4
KJAZ	13	3	4	177	3
KJAZ	14	4	4	120	4
LPAJ	13	2	3	182	2
LPAJ	14	3	3	141	3
LPAV	13	2	3	217	2
LPAV	14	3	3	148	3
LRAC	14	3	3	139	3
LSAS	13	2	3	128	2
LSAS	14	3	3	134	3
PE5	4	5	5	167	5
PE5	7	8	5	134	8
PE5	8	9	5	111	9
PE5	9	10	5	152	10
PE5	10	11	5	129	11
PE5	11	12	5	100	12
PE5	12	13	5	121	13
PH0	6	7	4	183	7
PH0	7	8	4	140	8
PH0	8	9	4	141	9
RT0	7	8	7	154	8
RT0	8	9	7	120	9
RT0	9	10	7	147	10
RT0	10	11	7	130	11
RT0	11	12	7	121	12
THV	9	4	4	158	4
THV	12	7	4	108	7
THV	13	8	4	156	8
THV	14	9	4	113	9
TU9	3	3	6	217	3
TU9	4	4	6	144	4
TU9	7	7	6	154	7
TU9	8	8	6	141	8
TU9	9	9	6	103	9
TU9	10	10	6	116	10
TU9	11	11	6	100	11
TU9	12	12	6	101	12
TU9	13	13	6	133	13

## Sheet: table 2 upper right panel
identity	year	age	α	arrival date	ageclass
AAAX	3	3	3	146	3
AAAX	4	4	3	144	4
AAAZ	3	3	3	132	3
AAAZ	4	4	3	96	4
AAAZ	5	5	3	109	5
AAAZ	6	6	3	107	6
AAAZ	7	7	3	120	7
AAAZ	8	8	3	147	8
AAAZ	9	9	3	104	9
ABAD	5	5	4	144	5
ABAD	6	6	4	127	6
ABAD	7	7	4	120	7
ABAJ	4	4	4	134	4
ABAJ	5	5	4	116	5
ABAJ	6	6	4	79	6
ABAJ	7	7	4	132	7
ABAJ	8	8	4	126	8
ABAJ	9	9	4	90	9
ABAJ	10	10	4	200	10
ABAJ	11	11	4	93	11
ABAJ	12	12	4	182	12
ABAR	4	4	4	137	4
ABAR	5	5	4	116	5
ABAR	6	6	4	134	6
ABAR	7	7	4	120	7
ABAR	8	8	4	125	8
ABAR	9	9	4	122	9
ABAR	10	10	4	109	10
ABAR	11	11	4	113	11
ABAZ	7	7	6	118	7
ABAZ	8	8	6	147	8
ACAJ	4	4	4	159	4
ACAJ	5	5	4	123	5
ACAJ	6	6	4	114	6
ACAJ	7	7	4	120	7
ACAJ	8	8	4	98	8
ACAL	3	3	3	104	3
ACAL	4	4	3	96	4
ACAL	5	5	3	109	5
ADAF	4	4	4	157	4
ADAF	5	5	4	137	5
ADAF	6	6	4	127	6
ADAF	7	7	4	120	7
ADAF	8	8	4	125	8
ADAF	9	9	4	118	9
ADAF	10	10	4	114	10
ADAF	12	12	4	114	12
ADAF	13	13	4	141	13
ADAV	5	5	5	116	5
ADAW	4	4	4	180	4
ADAW	5	5	4	130	5
AFAF	4	4	4	144	4
AFAF	5	5	4	137	5
AFAF	6	6	4	133	6
AFAF	7	7	4	141	7
AFAN	4	4	4	135	4
AFAN	5	5	4	123	5
AFAN	6	6	4	114	6
AFAN	7	7	4	78	7
AFAN	8	8	4	96	8
AFAP	4	4	4	144	4
AFAP	5	5	4	109	5
AFAP	6	6	4	111	6
AFAP	7	7	4	120	7
AFAP	8	8	4	117	8
AFAP	10	10	4	186	10
AFAP	12	12	4	149	12
AFAP	13	13	4	194	13
AFAR	5	5	5	207	5
AFAR	6	6	5	142	6
AFAR	7	7	5	141	7
AFAR	8	8	5	138	8
AFAR	9	9	5	146	9
AFAR	10	10	5	143	10
AFAR	12	12	5	142	12
AFAR	13	13	5	155	13
AFAS	4	4	4	82	4
AFAS	5	5	4	109	5
AFAS	6	6	4	118	6
AFAS	7	7	4	141	7
AFAS	8	8	4	117	8
AFAS	9	9	4	111	9
AFAS	10	10	4	99	10
AFAS	11	11	4	120	11
AFAS	12	12	4	135	12
AFAS	13	13	4	148	13
AFAW	4	4	4	135	4
AFAW	5	5	4	116	5
AFAW	6	6	4	107	6
AFAW	7	7	4	106	7
AFAW	8	8	4	147	8
AGAB	4	4	4	19	4
AGAB	5	5	4	102	5
AGAB	6	6	4	79	6
AGAG	4	4	4	137	4
AGAG	5	5	4	130	5
AGAG	6	6	4	134	6
AGAG	7	7	4	120	7
AGAG	8	8	4	147	8
AGAG	9	9	4	159	9
AGAG	10	10	4	116	10
AGAG	11	11	4	114	11
AGAG	12	12	4	133	12
AGAG	13	13	4	118	13
AGAH	4	4	4	141	4
AGAH	5	5	4	144	5
AHAH	5	5	5	116	5
AHAJ	3	3	3	139	3
AHAJ	4	4	3	141	4
AHAJ	5	5	3	142	5
AHAJ	6	6	3	140	6
AHAL	4	4	4	144	4
AHAL	5	5	4	130	5
AHAL	6	6	4	128	6
AHAL	7	7	4	155	7
AHAS	4	4	4	159	4
AHAS	5	5	4	137	5
AHAS	6	6	4	149	6
AHAS	7	7	4	132	7
AHAS	8	8	4	152	8
AHAS	9	9	4	125	9
AHAS	10	10	4	116	10
AHAS	12	12	4	114	12
AHAW	4	4	4	131	4
AHAW	5	5	4	130	5
AHAW	6	6	4	118	6
AHAW	7	7	4	159	7
AHAW	8	8	4	147	8
AHAZ	4	4	4	157	4
AHAZ	5	5	4	149	5
AHAZ	6	6	4	142	6
AHAZ	7	7	4	153	7
AJAA	5	5	5	137	5
AJAA	6	6	5	135	6
AJAA	7	7	5	132	7
AJAA	8	8	5	167	8
AJAA	9	9	5	132	9
AJAA	10	10	5	129	10
AJAA	11	11	5	197	11
AJAA	12	12	5	149	12
AJAA	13	13	5	141	13
AJAD	5	5	5	123	5
AJAD	6	6	5	111	6
AJAD	7	7	5	120	7
AJAD	8	8	5	105	8
AJAD	9	9	5	118	9
AJAH	5	5	4	116	5
AJAH	6	6	4	127	6
AJAH	7	7	4	120	7
AJAJ	4	4	4	144	4
AJAJ	5	5	4	130	5
AJAJ	8	8	4	201	8
AJAJ	9	9	4	125	9
AJAJ	10	10	4	116	10
AJAJ	11	11	4	115	11
AJAJ	12	12	4	142	12
AJAJ	13	13	4	148	13
AJAK	5	5	5	151	5
AJAK	6	6	5	125	6
AJAK	7	7	5	141	7
AJAK	8	8	5	125	8
AJAK	9	9	5	102	9
ALAJ	5	5	5	156	5
ALAK	3	3	3	160	3
ALAK	4	4	3	144	4
ALAK	5	5	3	109	5
ALAK	6	6	3	107	6
ALAK	7	7	3	85	7
ALAK	8	8	3	98	8
ALAK	10	10	3	102	10
ALAK	11	11	3	168	11
ALAK	12	12	3	156	12
ALAK	13	13	3	113	13
ALAP	5	5	5	123	5
ALAP	6	6	5	114	6
ALAP	7	7	5	139	7
AMAD	5	5	5	156	5
AMAD	6	6	5	114	6
AMAD	7	7	5	141	7
AMAD	8	8	5	105	8
AMAD	9	9	5	123	9
AMAK	4	4	4	144	4
AMAK	5	5	4	116	5
AMAK	6	6	4	127	6
AMAK	7	7	4	139	7
AMAK	8	8	4	126	8
AMAK	9	9	4	132	9
AMAK	10	10	4	102	10
AMAL	4	4	4	137	4
AMAL	5	5	4	130	5
AMAL	6	6	4	149	6
AMAL	7	7	4	127	7
AMAL	8	8	4	126	8
AMAL	9	9	4	111	9
AMAL	10	10	4	129	10
AMAL	11	11	4	114	11
AMAL	12	12	4	114	12
AMAL	13	13	4	104	13
AMAX	4	4	4	135	4
AMAX	5	5	4	116	5
AMAX	6	6	4	100	6
AMAX	7	7	4	132	7
AMAX	8	8	4	103	8
AMAX	9	9	4	116	9
AMAX	10	10	4	102	10
AMAX	11	11	4	86	11
ANAB	5	5	5	109	5
ANAB	6	6	5	111	6
ANAB	7	7	5	99	7
ANAB	9	9	5	104	9
ANAB	10	10	5	151	10
ANAB	11	11	5	127	11
ANAD	7	7	5	118	7
ANAD	8	8	5	161	8
ANAN	4	4	4	134	4
ANAN	5	5	4	116	5
ANAN	6	6	4	121	6
ANAN	7	7	4	120	7
ANAN	8	8	4	98	8
ANAN	9	9	4	71	9
ANAN	10	10	4	102	10
ANAN	11	11	4	94	11
ANAN	12	12	4	149	12
ANAN	13	13	4	113	13
ANAS	4	4	4	141	4
ANAS	5	5	4	102	5
ANAS	6	6	4	65	6
ANAS	7	7	4	78	7
ANAS	8	8	4	77	8
ANAW	4	4	4	135	4
ANAW	5	5	4	130	5
APAH	3	3	3	139	3
APAH	4	4	3	134	4
APAU	4	4	4	141	4
APAU	5	5	4	137	5
APAU	6	6	4	118	6
ARAH	5	5	5	144	5
ARAH	6	6	5	156	6
ARAH	7	7	5	159	7
ARAH	8	8	5	140	8
ARAH	9	9	5	136	9
ASAH	4	4	4	135	4
ASAH	5	5	4	130	5
ASAH	6	6	4	128	6
ASAH	7	7	4	120	7
ASAH	8	8	4	147	8
ASAH	9	9	4	146	9
ASAH	10	10	4	129	10
ASAH	11	11	4	115	11
ASAH	12	12	4	135	12
ASAH	13	13	4	134	13
ASAP	3	3	3	149	3
ASAP	4	4	3	135	4
ASAP	5	5	3	130	5
ASAP	6	6	3	114	6
ASAP	7	7	3	120	7
ASAP	8	8	3	117	8
ASAP	9	9	3	122	9
ASAP	10	10	3	123	10
ASAP	11	11	3	115	11
ASAP	12	12	3	128	12
ASAP	13	13	3	120	13
ASAX	3	3	3	146	3
ASAX	4	4	3	137	4
ASAX	5	5	3	137	5
ASAX	6	6	3	135	6
ASAX	7	7	3	139	7
ASAX	8	8	3	131	8
ASAX	9	9	3	125	9
ASAX	10	10	3	109	10
ASAX	11	11	3	114	11
ASAX	12	12	3	146	12
ASAX	13	13	3	134	13
ASAY	5	5	5	137	5
ASAY	6	6	5	121	6
ASAY	7	7	5	120	7
ASAY	8	8	5	131	8
ASAY	9	9	5	125	9
ASAY	10	10	5	135	10
ASAY	11	11	5	114	11
ASAY	12	12	5	126	12
AUAA	4	4	4	141	4
AUAA	5	5	4	137	5
AUAA	6	6	4	127	6
AUAA	7	7	4	127	7
AUAP	4	4	4	141	4
AUAP	5	5	4	130	5
AUAP	6	6	4	135	6
AUAP	7	7	4	120	7
AUAP	8	8	4	145	8
AUAP	9	9	4	125	9
AUAP	10	10	4	129	10
AUAP	11	11	4	108	11
AUAP	12	12	4	112	12
AUAP	13	13	4	132	13
AUAV	5	5	5	102	5
AUAV	6	6	5	107	6
AUAV	7	7	5	120	7
AUAV	8	8	5	105	8
AUAV	9	9	5	97	9
AUAV	10	10	5	100	10
AUAV	11	11	5	94	11
AWAF	4	4	4	145	4
AWAF	5	5	4	137	5
AWAF	6	6	4	133	6
AWAF	7	7	4	132	7
AWAF	8	8	4	126	8
AWAN	5	5	5	130	5
AWAN	6	6	5	127	6
AWAN	7	7	5	125	7
AWAN	8	8	5	117	8
AWAR	3	3	3	139	3
AWAR	4	4	3	137	4
AWAR	7	7	3	182	7
AWAR	8	8	3	96	8
AWAR	9	9	3	83	9
AWAR	10	10	3	113	10
AWAR	11	11	3	94	11
AWAR	12	12	3	112	12
AWAR	13	13	3	120	13
AWAU	4	4	4	153	4
AWAU	5	5	4	137	5
AWAU	6	6	4	134	6
AWAU	7	7	4	173	7
AXAG	3	3	3	139	3
AXAG	4	4	3	135	4
AXAG	5	5	3	116	5
AXAG	6	6	3	107	6
AXAG	7	7	3	118	7
BAAG	3	3	3	146	3
BAAG	4	4	3	137	4
BAAG	5	5	3	130	5
BAAG	6	6	3	121	6
BAAK	4	4	4	137	4
BAAK	5	5	4	102	5
BAAK	6	6	4	107	6
BAAK	7	7	4	15	7
BAAK	8	8	4	84	8
BAAK	9	9	4	97	9
BAAK	10	10	4	102	10
BAAK	11	11	4	94	11
BBAB	3	3	3	125	3
BBAB	4	4	3	141	4
BBAB	5	5	3	116	5
BBAB	6	6	3	100	6
BBAB	7	7	3	97	7
BBAB	8	8	3	96	8
BBAB	9	9	3	116	9
BBAF	4	4	4	153	4
BBAF	5	5	4	137	5
BBAF	6	6	4	128	6
BBAF	7	7	4	168	7
BBAF	8	8	4	140	8
BBAF	9	9	4	129	9
BBAF	10	10	4	121	10
BBAF	11	11	4	166	11
BBAF	12	12	4	133	12
BBAF	13	13	4	132	13
BBAT	5	5	5	116	5
BBAT	6	6	5	121	6
BBAT	7	7	5	99	7
BBAT	8	8	5	145	8
BBAT	9	9	5	104	9
BBAX	5	5	4	123	5
BBAX	6	6	4	111	6
BBAX	7	7	4	141	7
BBAX	8	8	4	112	8
BBAX	9	9	4	102	9
BBAX	10	10	4	116	10
BBAX	11	11	4	86	11
BBAX	12	12	4	114	12
BBAY	5	5	5	142	5
BBAY	6	6	5	128	6
BCAR	3	3	3	153	3
BDAN	5	5	5	123	5
BDAN	6	6	5	121	6
BDAN	7	7	5	139	7
BDAN	8	8	5	145	8
BDAN	9	9	5	104	9
BDAN	10	10	5	106	10
BDAN	11	11	5	92	11
BDAN	12	12	5	126	12
BDAP	4	4	4	135	4
BDAP	5	5	4	123	5
BDAP	6	6	4	107	6
BDAP	7	7	4	132	7
BDAU	5	5	5	123	5
BDAU	6	6	5	118	6
BJAA	4	4	4	144	4
BJAA	5	5	4	130	5
BJAA	6	6	4	128	6
BJAA	7	7	4	120	7
BJAA	8	8	4	147	8
BJAA	9	9	4	167	9
BJAA	10	10	4	113	10
BJAA	11	11	4	114	11
BJAA	12	12	4	126	12
BJAA	13	13	4	132	13
BJAZ	5	5	5	130	5
BJAZ	6	6	5	121	6
BJAZ	7	7	5	120	7
BJAZ	8	8	5	145	8
BJAZ	9	9	5	137	9
BKAA	3	3	3	149	3
BKAA	4	4	3	137	4
BKAN	4	4	4	137	4
BKAN	5	5	4	123	5
BKAX	3	3	3	151	3
BKAX	4	4	3	141	4
BKAX	5	5	3	127	5
BKAX	6	6	3	114	6
BLAD	4	4	4	137	4
BLAD	5	5	4	116	5
BLAD	6	6	4	135	6
BLAD	7	7	4	120	7
BLAD	8	8	4	125	8
BLAD	9	9	4	109	9
BLAD	10	10	4	109	10
BLAD	11	11	4	114	11
BLAD	12	12	4	128	12
BLAD	13	13	4	120	13
BLAH	4	4	4	141	4
BLAH	5	5	4	156	5
BLAH	6	6	4	121	6
BLAH	7	7	4	120	7
BLAH	8	8	4	126	8
BLAH	9	9	4	111	9
BLAH	10	10	4	116	10
BLAN	6	6	6	156	6
BLAR	4	4	4	143	4
BLAR	5	5	4	149	5
BLAR	6	6	4	134	6
BLAR	7	7	4	139	7
BLAR	8	8	4	138	8
BLAR	9	9	4	125	9
BLAR	10	10	4	135	10
BLAR	11	11	4	122	11
BLAR	12	12	4	125	12
BLAR	13	13	4	120	13
BMAA	3	3	3	125	3
BMAA	4	4	3	135	4
BMAA	5	5	3	130	5
BMAN	5	5	5	137	5
BMAN	6	6	5	121	6
BMAN	7	7	5	132	7
BMAN	8	8	5	138	8
BMAN	9	9	5	123	9
BMAN	10	10	5	116	10
BMAN	11	11	5	120	11
BMAN	12	12	5	128	12
BMAN	13	13	5	127	13
BMAT	4	4	4	144	4
BMAT	5	5	4	149	5
BMAT	6	6	4	125	6
BMAT	7	7	4	125	7
BMAT	8	8	4	105	8
BNAC	3	3	3	146	3
BNAC	4	4	3	141	4
BNAC	5	5	3	116	5
BNAC	6	6	3	111	6
BNAC	7	7	3	104	7
BNAC	8	8	3	98	8
BNAH	4	4	4	144	4
BNAH	5	5	4	130	5
BNAH	6	6	4	121	6
BNAH	7	7	4	160	7
BNAH	8	8	4	167	8
BNAH	9	9	4	153	9
BNAH	10	10	4	163	10
BNAH	12	12	4	182	12
BNAH	13	13	4	182	13
BNAR	4	4	4	137	4
BNAR	5	5	4	123	5
BNAR	6	6	4	121	6
BNAR	7	7	4	155	7
BNAR	8	8	4	131	8
BNAR	9	9	4	136	9
BNAT	3	3	3	146	3
BNAT	4	4	3	137	4
BNAT	5	5	3	130	5
BPAL	4	4	4	137	4
BPAL	5	5	4	149	5
BPAL	6	6	4	134	6
BPAZ	3	3	3	144	3
BPAZ	4	4	3	141	4
BPAZ	5	5	3	142	5
BSAL	5	5	5	144	5
BSAL	6	6	5	114	6
BSAL	7	7	5	106	7
BSAL	8	8	5	98	8
BSAL	9	9	5	132	9
BSAL	10	10	5	113	10
BSAL	11	11	5	66	11
BSAL	12	12	5	105	12
BSAL	13	13	5	127	13
BSAT	4	4	4	135	4
BSAT	5	5	4	130	5
BSAT	6	6	4	125	6
BSAT	7	7	4	120	7
BSAT	8	8	4	126	8
BSAT	9	9	4	118	9
BSAT	10	10	4	186	10
BSAT	11	11	4	127	11
BSAW	4	4	4	137	4
BSAW	5	5	4	191	5
BSAW	6	6	4	114	6
BSAW	7	7	4	131	7
BSAW	8	8	4	98	8
BSAY	4	4	4	137	4
BSAY	5	5	4	116	5
BSAY	6	6	4	107	6
BSAY	7	7	4	120	7
BSAY	8	8	4	105	8
BSAY	9	9	4	102	9
BSAY	10	10	4	113	10
BSAY	11	11	4	115	11
BSAY	12	12	4	142	12
BSAY	13	13	4	141	13
BTAF	4	4	4	134	4
BTAF	5	5	4	142	5
BTAF	6	6	4	125	6
BTAF	7	7	4	131	7
BTAF	8	8	4	125	8
BTAF	9	9	4	125	9
BTAF	10	10	4	123	10
BTAF	11	11	4	122	11
BTAF	12	12	4	121	12
BTAF	13	13	4	120	13
BTAG	6	6	5	142	6
BTAG	7	7	5	120	7
BTAG	8	8	5	126	8
BTAG	11	11	5	127	11
BTAG	12	12	5	156	12
BTAG	13	13	5	155	13
BTAX	4	4	4	137	4
BTAX	5	5	4	137	5
BTAX	6	6	4	121	6
BTAX	7	7	4	120	7
BTAX	8	8	4	133	8
BTAX	9	9	4	118	9
BTAX	10	10	4	113	10
BTAX	11	11	4	108	11
BTAX	12	12	4	128	12
BTAX	13	13	4	113	13
DFAF	11	4	4	126	4
DFAF	12	5	4	126	5
DFAF	13	6	4	125	6
DFAP	11	4	4	149	4
DFAP	12	5	4	155	5
DFAP	13	6	4	195	6
DLAV	11	4	4	157	4
DMAC	12	5	5	119	5
DMAJ	12	5	5	126	5
DMAU	12	5	5	128	5
DMAU	13	6	5	134	6
DMAW	10	3	3	156	3
DMAW	11	4	3	157	4
DMAW	12	5	3	135	5
DMAW	13	6	3	155	6
DNAU	12	5	5	114	5
DNAU	13	6	5	113	6
DPAD	12	5	5	126	5
DPAD	13	6	5	111	6
DPAK	12	5	5	156	5
DPAK	13	6	5	194	6
DPAM	10	3	3	143	3
DPAM	11	4	3	115	4
DPAZ	11	4	4	120	4
DPAZ	12	5	4	128	5
DPAZ	13	6	4	120	6
DRAR	11	4	4	160	4
DRAR	12	5	4	147	5
DRAR	13	6	4	153	6
DRAZ	10	3	3	200	3
DRAZ	11	4	3	141	4
DRAZ	12	5	3	135	5
DSAJ	10	3	3	121	3
DSAJ	11	4	3	106	4
DSAJ	12	5	3	112	5
DSAJ	13	6	3	83	6
DTAG	11	4	3	129	4
DTAG	12	5	3	126	5
DTAG	13	6	3	151	6
DUAB	11	4	4	66	4
DUAB	12	5	4	105	5
DUAB	13	6	4	104	6
DUAD	11	4	4	183	4
DUAD	12	5	4	147	5
DUAY	11	4	4	133	4
DUAY	12	5	4	119	5
DUAY	13	6	4	132	6
DVAJ	10	3	3	143	3
DVAJ	11	4	3	182	4
DVAJ	12	5	3	128	5
DVAJ	13	6	3	152	6
DVAL	13	6	6	160	6
DVAP	12	5	5	121	5
DVAP	13	6	5	104	6
DVAU	11	4	4	115	4
DVAU	12	5	4	128	5
DVAU	13	6	4	104	6
DVAY	12	5	5	156	5
DVAY	13	6	5	127	6
DWAJ	11	4	4	115	4
DWAJ	12	5	4	142	5
DWAJ	13	6	4	141	6
DWAR	12	5	5	121	5
DWAS	12	5	5	135	5
DWAS	13	6	5	134	6
DWAY	12	5	5	147	5
DWAY	13	6	5	151	6
DXAS	10	3	3	137	3
DXAS	11	4	3	183	4
DXAT	12	5	5	135	5
DXAT	13	6	5	148	6
DXAU	10	3	3	143	3
DXAU	11	4	3	120	4
DXAU	12	5	3	142	5
DXAU	13	6	3	134	6
DXAX	10	3	3	149	3
DXAX	11	4	3	129	4
DXAX	12	5	3	140	5
DXAX	13	6	3	125	6
DYAC	11	4	4	121	4
DYAC	12	5	4	133	5
DYAC	13	6	4	125	6
DYAG	11	4	4	183	4
DYAG	12	5	4	126	5
DYAG	13	6	4	104	6
DYAR	11	4	4	153	4
DYAR	12	5	4	126	5
DYAR	13	6	4	146	6
DZAK	12	5	5	112	5
DZAM	12	5	5	162	5
DZAM	13	6	5	134	6
DZAX	11	4	4	129	4
DZAX	12	5	4	128	5
DZAX	13	6	4	113	6
E089	6	6	4	142	6
E089	7	7	4	141	7
E089	8	8	4	138	8
E089	9	9	4	118	9
E089	10	10	4	123	10
E089	12	12	4	135	12
E089	13	13	4	127	13
E373	7	6	6	148	6
E373	8	7	6	182	7
E373	9	8	6	125	8
E373	10	9	6	129	9
E523	9	7	7	167	7
E523	10	8	7	143	8
E523	11	9	7	127	9
E523	12	10	7	140	10
E523	13	11	7	125	11
E720	6	4	4	127	4
E720	7	5	4	139	5
E720	8	6	4	131	6
E720	9	7	4	132	7
E720	10	8	4	123	8
E720	11	9	4	122	9
E720	12	10	4	121	10
E720	13	11	4	113	11
EA91	3	6	6	193	6
EA91	4	7	6	143	7
EA91	5	8	6	116	8
EA91	6	9	6	114	9
EA91	7	10	6	104	10
EA91	8	11	6	152	11
EA91	9	12	6	116	12
EA91	10	13	6	106	13
EL52	1	4	4	114	4
EL52	2	5	4	147	5
EL52	3	6	4	111	6
EL52	4	7	4	141	7
EL52	5	8	4	102	8
EL52	6	9	4	133	9
EL52	7	10	4	92	10
EL52	8	11	4	103	11
EL52	9	12	4	123	12
EL52	10	13	4	92	13
ES51	2	5	5	126	5
ES51	3	6	5	69	6
ES51	4	7	5	54	7
ES51	5	8	5	102	8
ES51	6	9	5	134	9
ES51	7	10	5	141	10
ES51	8	11	5	63	11
ES51	10	13	5	81	13
ET54	2	5	5	119	5
ET54	3	6	5	144	6
ET54	6	9	5	147	9
ET54	8	11	5	168	11
ET54	9	12	5	185	12
ET54	10	13	5	116	13
EU83	7	9	7	127	9
EU83	8	10	7	147	10
EU83	9	11	7	116	11
EU83	10	12	7	135	12
EU83	11	13	7	107	13
GDAP	12	4	4	170	4
GDAP	13	5	4	134	5
GDAX	12	4	4	135	4
GDAX	13	5	4	113	5
GGAC	12	4	4	126	4
GGAC	13	5	4	146	5
GGAV	12	4	4	126	4
GGAV	13	5	4	132	5
GJAT	10	3	3	158	3
GJAT	12	5	3	140	5
GJAT	13	6	3	132	6
GKAB	12	5	5	156	5
GKAB	13	6	5	120	6
GKAV	12	5	5	121	5
GKAV	13	6	5	146	6
GLAC	11	4	4	183	4
GLAC	12	5	4	149	5
GLAC	13	6	4	120	6
GNAG	12	4	4	133	4
GNAG	13	5	4	125	5
GNAR	12	4	4	128	4
GNAR	13	5	4	120	5
GNAU	12	4	4	156	4
GNAU	13	5	4	141	5
GPAD	12	4	4	161	4
GPAD	13	5	4	146	5
GPAR	12	4	4	126	4
GPAR	13	5	4	132	5
GRAC	12	4	4	140	4
GRAS	12	4	4	154	4
GRAS	13	5	4	118	5
GSAN	12	4	4	121	4
GSAN	13	5	4	118	5
GSAW	12	4	4	140	4
GSAW	13	5	4	132	5
GSAY	12	4	4	160	4
GSAY	13	5	4	146	5
GTAJ	12	4	4	133	4
GTAJ	13	5	4	148	5
GTAK	12	4	4	126	4
GTAK	13	5	4	146	5
HAAJ	12	3	3	133	3
HAAJ	13	4	3	160	4
HAAP	13	4	4	146	4
HCAP	13	4	4	183	4
HCAR	13	4	4	148	4
HCAT	13	4	4	148	4
HCAU	13	4	4	159	4
HDAG	13	4	4	139	4
HFAA	13	4	4	146	4
HFAR	13	4	4	146	4
HGAU	13	4	4	146	4
HHAD	12	3	3	133	3
HJAB	13	4	4	155	4
HJAM	12	3	3	140	3
HJAM	13	4	3	139	4
HKAH	13	4	4	152	4
HKAP	13	4	4	139	4
HKAT	13	4	4	151	4
HKAX	13	4	4	132	4
HLAP	13	4	4	187	4
HLAU	13	4	4	146	4
HMAL	13	4	4	196	4
HMAT	12	3	3	153	3
HNAF	12	3	3	154	3
HNAF	13	4	3	132	4
HNAG	13	4	4	134	4
HNAT	12	3	3	177	3
HNAT	13	4	3	148	4
HPAJ	12	3	3	128	3
HPAJ	13	4	3	120	4
HRAA	12	3	3	149	3
HRAA	13	4	3	141	4
HSAJ	13	4	4	134	4
HSAL	13	4	4	141	4
HSAN	12	3	3	140	3
HSAN	13	4	3	125	4
HSAZ	13	4	4	155	4
HTAS	13	4	4	132	4
HUAF	13	4	4	134	4
HYAR	13	4	4	120	4
HZAB	12	3	3	146	3
HZAB	13	4	3	111	4
HZAD	13	4	4	120	4
HZAK	13	4	4	104	4
HZAS	13	4	4	148	4
HZAV	13	4	4	166	4
KJAJ	13	4	4	148	4
KJAZ	13	4	4	120	4
LPAJ	13	3	3	141	3
LPAV	13	3	3	148	3
LRAC	13	3	3	139	3
LSAS	13	3	3	134	3
PE5	3	5	5	167	5
PE5	6	8	5	134	8
PE5	7	9	5	111	9
PE5	8	10	5	152	10
PE5	9	11	5	129	11
PE5	10	12	5	100	12
PE5	11	13	5	121	13
PH0	5	7	4	183	7
PH0	6	8	4	140	8
PH0	7	9	4	141	9
RT0	6	8	7	154	8
RT0	7	9	7	120	9
RT0	8	10	7	147	10
RT0	9	11	7	130	11
RT0	10	12	7	121	12
THV	8	4	4	158	4
THV	11	7	4	108	7
THV	12	8	4	156	8
THV	13	9	4	113	9
TU9	6	7	6	154	7
TU9	7	8	6	141	8
TU9	8	9	6	103	9
TU9	9	10	6	116	10
TU9	10	11	6	100	11
TU9	11	12	6	101	12
TU9	12	13	6	133	13

## Sheet: table 2 lower left panel
identity	year	EXP	α	arrival date	ageclass
AAAX	3	0	3	215	2
AAAX	4	0	3	146	3
AAAX	5	1	3	144	4
AAAZ	2	0	3	176	1
AAAZ	4	0	3	132	3
AAAZ	5	1	3	96	4
AAAZ	6	2	3	109	5
AAAZ	7	3	3	107	6
AAAZ	8	4	3	120	7
AAAZ	9	5	3	147	8
AAAZ	10	6	3	104	9
ABAD	4	0	4	161	3
ABAD	6	1	4	144	5
ABAD	7	2	4	127	6
ABAD	8	3	4	120	7
ABAJ	3	0	4	140	2
ABAJ	4	0	4	151	3
ABAJ	5	0	4	134	4
ABAJ	6	1	4	116	5
ABAJ	7	2	4	79	6
ABAJ	8	3	4	132	7
ABAJ	9	4	4	126	8
ABAJ	10	5	4	90	9
ABAJ	11	6	4	200	10
ABAJ	12	7	4	93	11
ABAJ	13	7	4	182	12
ABAR	3	0	4	166	2
ABAR	4	0	4	146	3
ABAR	5	0	4	137	4
ABAR	6	1	4	116	5
ABAR	7	2	4	134	6
ABAR	8	3	4	120	7
ABAR	9	4	4	125	8
ABAR	10	5	4	122	9
ABAR	11	6	4	109	10
ABAR	12	7	4	113	11
ABAZ	3	0	6	201	2
ABAZ	4	0	6	146	3
ABAZ	5	0	6	141	4
ABAZ	8	1	6	118	7
ABAZ	9	1	6	147	8
ACAJ	3	0	4	166	2
ACAJ	4	0	4	165	3
ACAJ	5	0	4	159	4
ACAJ	6	1	4	123	5
ACAJ	7	2	4	114	6
ACAJ	8	3	4	120	7
ACAJ	9	4	4	98	8
ACAL	3	0	3	199	2
ACAL	4	0	3	104	3
ACAL	5	1	3	96	4
ACAL	6	2	3	109	5
ADAF	3	0	4	166	2
ADAF	4	0	4	156	3
ADAF	5	0	4	157	4
ADAF	6	1	4	137	5
ADAF	7	2	4	127	6
ADAF	8	3	4	120	7
ADAF	9	4	4	125	8
ADAF	10	5	4	118	9
ADAF	11	6	4	114	10
ADAF	13	7	4	114	12
ADAF	14	8	4	141	13
ADAV	3	0	5	180	2
ADAV	5	0	5	135	4
ADAV	6	0	5	116	5
ADAW	3	0	4	199	2
ADAW	4	0	4	139	3
ADAW	5	0	4	180	4
ADAW	6	1	4	130	5
AFAF	4	0	4	161	3
AFAF	5	0	4	144	4
AFAF	6	1	4	137	5
AFAF	7	2	4	133	6
AFAF	8	3	4	141	7
AFAN	3	0	4	126	2
AFAN	4	0	4	111	3
AFAN	5	0	4	135	4
AFAN	6	1	4	123	5
AFAN	7	2	4	114	6
AFAN	8	3	4	78	7
AFAN	9	4	4	96	8
AFAP	3	0	4	203	2
AFAP	4	0	4	153	3
AFAP	5	0	4	144	4
AFAP	6	1	4	109	5
AFAP	7	2	4	111	6
AFAP	8	3	4	120	7
AFAP	9	4	4	117	8
AFAP	11	6	4	186	10
AFAP	13	7	4	149	12
AFAP	14	8	4	194	13
AFAR	6	0	5	207	5
AFAR	7	1	5	142	6
AFAR	8	2	5	141	7
AFAR	9	3	5	138	8
AFAR	10	4	5	146	9
AFAR	11	5	5	143	10
AFAR	13	6	5	142	12
AFAR	14	7	5	155	13
AFAS	3	0	4	206	2
AFAS	4	0	4	118	3
AFAS	5	0	4	82	4
AFAS	6	1	4	109	5
AFAS	7	2	4	118	6
AFAS	8	3	4	141	7
AFAS	9	4	4	117	8
AFAS	10	5	4	111	9
AFAS	11	6	4	99	10
AFAS	12	7	4	120	11
AFAS	13	8	4	135	12
AFAS	14	9	4	148	13
AFAW	3	0	4	201	2
AFAW	4	0	4	153	3
AFAW	5	0	4	135	4
AFAW	6	1	4	116	5
AFAW	7	2	4	107	6
AFAW	8	3	4	106	7
AFAW	9	4	4	147	8
AGAB	4	0	4	161	3
AGAB	5	0	4	19	4
AGAB	6	1	4	102	5
AGAB	7	2	4	79	6
AGAG	4	0	4	207	3
AGAG	5	0	4	137	4
AGAG	6	1	4	130	5
AGAG	7	2	4	134	6
AGAG	8	3	4	120	7
AGAG	9	4	4	147	8
AGAG	10	5	4	159	9
AGAG	11	6	4	116	10
AGAG	12	7	4	114	11
AGAG	13	8	4	133	12
AGAG	14	9	4	118	13
AGAH	3	0	4	180	2
AGAH	4	0	4	132	3
AGAH	5	0	4	141	4
AGAH	6	1	4	144	5
AHAH	4	0	5	111	3
AHAH	5	0	5	137	4
AHAH	6	0	5	116	5
AHAJ	3	0	3	164	2
AHAJ	4	0	3	139	3
AHAJ	5	1	3	141	4
AHAJ	6	1	3	142	5
AHAJ	7	2	3	140	6
AHAL	3	0	4	166	2
AHAL	4	0	4	158	3
AHAL	5	0	4	144	4
AHAL	6	1	4	130	5
AHAL	7	2	4	128	6
AHAL	8	3	4	155	7
AHAS	3	0	4	145	2
AHAS	4	0	4	149	3
AHAS	5	0	4	159	4
AHAS	6	1	4	137	5
AHAS	7	2	4	149	6
AHAS	8	3	4	132	7
AHAS	9	4	4	152	8
AHAS	10	5	4	125	9
AHAS	11	6	4	116	10
AHAS	13	7	4	114	12
AHAW	3	0	4	194	2
AHAW	4	0	4	151	3
AHAW	5	0	4	131	4
AHAW	6	1	4	130	5
AHAW	7	2	4	118	6
AHAW	8	3	4	159	7
AHAW	9	4	4	147	8
AHAZ	3	0	4	201	2
AHAZ	4	0	4	160	3
AHAZ	5	0	4	157	4
AHAZ	6	1	4	149	5
AHAZ	7	2	4	142	6
AHAZ	8	3	4	153	7
AJAA	3	0	5	180	2
AJAA	4	0	5	165	3
AJAA	6	0	5	137	5
AJAA	7	1	5	135	6
AJAA	8	2	5	132	7
AJAA	9	3	5	167	8
AJAA	10	4	5	132	9
AJAA	11	5	5	129	10
AJAA	12	6	5	197	11
AJAA	13	7	5	149	12
AJAA	14	8	5	141	13
AJAD	4	0	5	144	3
AJAD	5	0	5	137	4
AJAD	6	0	5	123	5
AJAD	7	1	5	111	6
AJAD	8	2	5	120	7
AJAD	9	3	5	105	8
AJAD	10	4	5	118	9
AJAH	4	0	4	149	3
AJAH	6	1	4	116	5
AJAH	7	2	4	127	6
AJAH	8	3	4	120	7
AJAJ	3	0	4	194	2
AJAJ	4	0	4	146	3
AJAJ	5	0	4	144	4
AJAJ	6	1	4	130	5
AJAJ	9	2	4	201	8
AJAJ	10	3	4	125	9
AJAJ	11	4	4	116	10
AJAJ	12	5	4	115	11
AJAJ	13	5	4	142	12
AJAJ	14	6	4	148	13
AJAK	3	0	5	147	2
AJAK	4	0	5	139	3
AJAK	5	0	5	137	4
AJAK	6	0	5	151	5
AJAK	7	1	5	125	6
AJAK	8	2	5	141	7
AJAK	9	3	5	125	8
AJAK	10	4	5	102	9
ALAJ	6	0	5	156	5
ALAK	3	0	3	201	2
ALAK	4	0	3	160	3
ALAK	5	1	3	144	4
ALAK	6	2	3	109	5
ALAK	7	3	3	107	6
ALAK	8	4	3	85	7
ALAK	9	5	3	98	8
ALAK	11	6	3	102	10
ALAK	12	7	3	168	11
ALAK	13	8	3	156	12
ALAK	14	9	3	113	13
ALAP	3	0	5	168	2
ALAP	4	0	5	172	3
ALAP	5	0	5	137	4
ALAP	6	0	5	123	5
ALAP	7	1	5	114	6
ALAP	8	2	5	139	7
AMAD	4	0	5	181	3
AMAD	5	0	5	143	4
AMAD	6	0	5	156	5
AMAD	7	1	5	114	6
AMAD	8	2	5	141	7
AMAD	9	3	5	105	8
AMAD	10	4	5	123	9
AMAK	3	0	4	119	2
AMAK	4	0	4	151	3
AMAK	5	0	4	144	4
AMAK	6	1	4	116	5
AMAK	7	2	4	127	6
AMAK	8	3	4	139	7
AMAK	9	4	4	126	8
AMAK	10	5	4	132	9
AMAK	11	6	4	102	10
AMAL	3	0	4	173	2
AMAL	4	0	4	151	3
AMAL	5	0	4	137	4
AMAL	6	1	4	130	5
AMAL	7	2	4	149	6
AMAL	8	3	4	127	7
AMAL	9	4	4	126	8
AMAL	10	5	4	111	9
AMAL	11	6	4	129	10
AMAL	12	7	4	114	11
AMAL	13	7	4	114	12
AMAL	14	8	4	104	13
AMAX	3	0	4	14	2
AMAX	4	0	4	104	3
AMAX	5	0	4	135	4
AMAX	6	1	4	116	5
AMAX	7	2	4	100	6
AMAX	8	3	4	132	7
AMAX	9	4	4	103	8
AMAX	10	5	4	116	9
AMAX	11	6	4	102	10
AMAX	12	7	4	86	11
ANAB	3	0	5	182	2
ANAB	4	0	5	132	3
ANAB	5	0	5	141	4
ANAB	6	0	5	109	5
ANAB	7	1	5	111	6
ANAB	8	2	5	99	7
ANAB	10	3	5	104	9
ANAB	11	4	5	151	10
ANAB	12	5	5	127	11
ANAD	8	1	5	118	7
ANAD	9	2	5	161	8
ANAN	3	0	4	215	2
ANAN	4	0	4	153	3
ANAN	5	0	4	134	4
ANAN	6	1	4	116	5
ANAN	7	2	4	121	6
ANAN	8	3	4	120	7
ANAN	9	4	4	98	8
ANAN	10	5	4	71	9
ANAN	11	6	4	102	10
ANAN	12	7	4	94	11
ANAN	13	8	4	149	12
ANAN	14	9	4	113	13
ANAS	4	0	4	153	3
ANAS	5	0	4	141	4
ANAS	6	1	4	102	5
ANAS	7	2	4	65	6
ANAS	8	3	4	78	7
ANAS	9	4	4	77	8
ANAW	3	0	4	147	2
ANAW	4	0	4	146	3
ANAW	5	0	4	135	4
ANAW	6	1	4	130	5
APAH	3	0	3	175	2
APAH	4	0	3	139	3
APAH	5	1	3	134	4
APAU	3	0	4	166	2
APAU	4	0	4	146	3
APAU	5	0	4	141	4
APAU	6	1	4	137	5
APAU	7	2	4	118	6
ARAH	3	0	5	196	2
ARAH	4	0	5	160	3
ARAH	6	0	5	144	5
ARAH	7	1	5	156	6
ARAH	8	2	5	159	7
ARAH	9	3	5	140	8
ARAH	10	4	5	136	9
ASAH	3	0	4	182	2
ASAH	4	0	4	149	3
ASAH	5	0	4	135	4
ASAH	6	1	4	130	5
ASAH	7	2	4	128	6
ASAH	8	3	4	120	7
ASAH	9	4	4	147	8
ASAH	10	5	4	146	9
ASAH	11	6	4	129	10
ASAH	12	7	4	115	11
ASAH	13	7	4	135	12
ASAH	14	8	4	134	13
ASAP	3	0	3	194	2
ASAP	4	0	3	149	3
ASAP	5	1	3	135	4
ASAP	6	2	3	130	5
ASAP	7	3	3	114	6
ASAP	8	4	3	120	7
ASAP	9	5	3	117	8
ASAP	10	6	3	122	9
ASAP	11	7	3	123	10
ASAP	12	8	3	115	11
ASAP	13	9	3	128	12
ASAP	14	10	3	120	13
ASAX	3	0	3	182	2
ASAX	4	0	3	146	3
ASAX	5	1	3	137	4
ASAX	6	1	3	137	5
ASAX	7	2	3	135	6
ASAX	8	3	3	139	7
ASAX	9	4	3	131	8
ASAX	10	5	3	125	9
ASAX	11	6	3	109	10
ASAX	12	7	3	114	11
ASAX	13	8	3	146	12
ASAX	14	9	3	134	13
ASAY	3	0	5	166	2
ASAY	4	0	5	158	3
ASAY	5	0	5	141	4
ASAY	6	0	5	137	5
ASAY	7	1	5	121	6
ASAY	8	2	5	120	7
ASAY	9	3	5	131	8
ASAY	10	4	5	125	9
ASAY	11	5	5	135	10
ASAY	12	6	5	114	11
ASAY	13	7	5	126	12
AUAA	3	0	4	206	2
AUAA	4	0	4	149	3
AUAA	5	0	4	141	4
AUAA	6	1	4	137	5
AUAA	7	2	4	127	6
AUAA	8	3	4	127	7
AUAP	3	0	4	187	2
AUAP	4	0	4	146	3
AUAP	5	0	4	141	4
AUAP	6	1	4	130	5
AUAP	7	2	4	135	6
AUAP	8	3	4	120	7
AUAP	9	4	4	145	8
AUAP	10	5	4	125	9
AUAP	11	6	4	129	10
AUAP	12	7	4	108	11
AUAP	13	7	4	112	12
AUAP	14	8	4	132	13
AUAV	2	0	5	129	1
AUAV	4	0	5	177	3
AUAV	5	0	5	137	4
AUAV	6	0	5	102	5
AUAV	7	1	5	107	6
AUAV	8	2	5	120	7
AUAV	9	3	5	105	8
AUAV	10	4	5	97	9
AUAV	11	5	5	100	10
AUAV	12	6	5	94	11
AWAF	4	0	4	174	3
AWAF	5	0	4	145	4
AWAF	6	1	4	137	5
AWAF	7	2	4	133	6
AWAF	8	3	4	132	7
AWAF	9	4	4	126	8
AWAN	4	0	5	207	3
AWAN	5	0	5	141	4
AWAN	6	0	5	130	5
AWAN	7	1	5	127	6
AWAN	8	2	5	125	7
AWAN	9	3	5	117	8
AWAR	3	0	3	173	2
AWAR	4	0	3	139	3
AWAR	5	1	3	137	4
AWAR	8	2	3	182	7
AWAR	9	3	3	96	8
AWAR	10	4	3	83	9
AWAR	11	5	3	113	10
AWAR	12	6	3	94	11
AWAR	13	7	3	112	12
AWAR	14	8	3	120	13
AWAU	3	0	4	166	2
AWAU	4	0	4	146	3
AWAU	5	0	4	153	4
AWAU	6	1	4	137	5
AWAU	7	2	4	134	6
AWAU	8	3	4	173	7
AXAG	4	0	3	139	3
AXAG	5	1	3	135	4
AXAG	6	2	3	116	5
AXAG	7	3	3	107	6
AXAG	8	4	3	118	7
BAAG	3	0	3	192	2
BAAG	4	0	3	146	3
BAAG	5	1	3	137	4
BAAG	6	2	3	130	5
BAAG	7	3	3	121	6
BAAK	3	0	4	166	2
BAAK	4	0	4	156	3
BAAK	5	0	4	137	4
BAAK	6	1	4	102	5
BAAK	7	2	4	107	6
BAAK	8	3	4	15	7
BAAK	9	4	4	84	8
BAAK	10	5	4	97	9
BAAK	11	6	4	102	10
BAAK	12	7	4	94	11
BBAB	4	0	3	125	3
BBAB	5	1	3	141	4
BBAB	6	1	3	116	5
BBAB	7	2	3	100	6
BBAB	8	3	3	97	7
BBAB	9	4	3	96	8
BBAB	10	5	3	116	9
BBAF	5	0	4	153	4
BBAF	6	1	4	137	5
BBAF	7	2	4	128	6
BBAF	8	3	4	168	7
BBAF	9	4	4	140	8
BBAF	10	5	4	129	9
BBAF	11	6	4	121	10
BBAF	12	7	4	166	11
BBAF	13	8	4	133	12
BBAF	14	9	4	132	13
BBAT	4	0	5	167	3
BBAT	5	0	5	141	4
BBAT	6	0	5	116	5
BBAT	7	1	5	121	6
BBAT	8	2	5	99	7
BBAT	9	3	5	145	8
BBAT	10	4	5	104	9
BBAX	6	1	4	123	5
BBAX	7	2	4	111	6
BBAX	8	3	4	141	7
BBAX	9	4	4	112	8
BBAX	10	5	4	102	9
BBAX	11	6	4	116	10
BBAX	12	7	4	86	11
BBAX	13	8	4	114	12
BBAY	4	0	5	177	3
BBAY	5	0	5	143	4
BBAY	6	0	5	142	5
BBAY	7	1	5	128	6
BCAR	3	0	3	216	2
BCAR	4	0	3	153	3
BDAN	4	0	5	151	3
BDAN	5	0	5	135	4
BDAN	6	0	5	123	5
BDAN	7	1	5	121	6
BDAN	8	2	5	139	7
BDAN	9	3	5	145	8
BDAN	10	4	5	104	9
BDAN	11	5	5	106	10
BDAN	12	6	5	92	11
BDAN	13	6	5	126	12
BDAP	3	0	4	185	2
BDAP	4	0	4	140	3
BDAP	5	0	4	135	4
BDAP	6	1	4	123	5
BDAP	7	2	4	107	6
BDAP	8	3	4	132	7
BDAU	3	0	5	220	2
BDAU	4	0	5	146	3
BDAU	5	0	5	135	4
BDAU	6	0	5	123	5
BDAU	7	1	5	118	6
BJAA	3	0	4	203	2
BJAA	4	0	4	173	3
BJAA	5	0	4	144	4
BJAA	6	1	4	130	5
BJAA	7	2	4	128	6
BJAA	8	3	4	120	7
BJAA	9	4	4	147	8
BJAA	10	5	4	167	9
BJAA	11	6	4	113	10
BJAA	12	7	4	114	11
BJAA	13	8	4	126	12
BJAA	14	9	4	132	13
BJAZ	3	0	5	182	2
BJAZ	4	0	5	149	3
BJAZ	6	0	5	130	5
BJAZ	7	1	5	121	6
BJAZ	8	2	5	120	7
BJAZ	9	3	5	145	8
BJAZ	10	4	5	137	9
BKAA	3	0	3	194	2
BKAA	4	0	3	149	3
BKAA	5	1	3	137	4
BKAN	4	0	4	165	3
BKAN	5	0	4	137	4
BKAN	6	1	4	123	5
BKAX	3	0	3	192	2
BKAX	4	0	3	151	3
BKAX	5	1	3	141	4
BKAX	6	2	3	127	5
BKAX	7	3	3	114	6
BLAD	3	0	4	216	2
BLAD	4	0	4	149	3
BLAD	5	0	4	137	4
BLAD	6	1	4	116	5
BLAD	7	2	4	135	6
BLAD	8	3	4	120	7
BLAD	9	4	4	125	8
BLAD	10	5	4	109	9
BLAD	11	6	4	109	10
BLAD	12	7	4	114	11
BLAD	13	7	4	128	12
BLAD	14	8	4	120	13
BLAH	3	0	4	178	2
BLAH	4	0	4	161	3
BLAH	5	0	4	141	4
BLAH	6	1	4	156	5
BLAH	7	2	4	121	6
BLAH	8	3	4	120	7
BLAH	9	4	4	126	8
BLAH	10	5	4	111	9
BLAH	11	6	4	116	10
BLAN	3	0	6	201	2
BLAN	4	0	6	167	3
BLAN	7	0	6	156	6
BLAR	4	0	4	165	3
BLAR	5	0	4	143	4
BLAR	6	1	4	149	5
BLAR	7	2	4	134	6
BLAR	8	3	4	139	7
BLAR	9	4	4	138	8
BLAR	10	5	4	125	9
BLAR	11	6	4	135	10
BLAR	12	7	4	122	11
BLAR	13	8	4	125	12
BLAR	14	9	4	120	13
BMAA	4	0	3	125	3
BMAA	5	1	3	135	4
BMAA	6	2	3	130	5
BMAN	4	0	5	205	3
BMAN	5	0	5	137	4
BMAN	6	0	5	137	5
BMAN	7	1	5	121	6
BMAN	8	2	5	132	7
BMAN	9	3	5	138	8
BMAN	10	4	5	123	9
BMAN	11	5	5	116	10
BMAN	12	6	5	120	11
BMAN	13	7	5	128	12
BMAN	14	8	5	127	13
BMAT	3	0	4	192	2
BMAT	5	0	4	144	4
BMAT	6	1	4	149	5
BMAT	7	1	4	125	6
BMAT	8	2	4	125	7
BMAT	9	3	4	105	8
BNAC	3	0	3	196	2
BNAC	4	0	3	146	3
BNAC	5	1	3	141	4
BNAC	6	2	3	116	5
BNAC	7	3	3	111	6
BNAC	8	4	3	104	7
BNAC	9	5	3	98	8
BNAH	3	0	4	194	2
BNAH	4	0	4	178	3
BNAH	5	0	4	144	4
BNAH	6	1	4	130	5
BNAH	7	2	4	121	6
BNAH	8	3	4	160	7
BNAH	9	4	4	167	8
BNAH	10	5	4	153	9
BNAH	11	6	4	163	10
BNAH	13	7	4	182	12
BNAH	14	8	4	182	13
BNAR	3	0	4	187	2
BNAR	4	0	4	186	3
BNAR	5	0	4	137	4
BNAR	6	1	4	123	5
BNAR	7	2	4	121	6
BNAR	8	3	4	155	7
BNAR	9	4	4	131	8
BNAR	10	5	4	136	9
BNAT	3	0	3	166	2
BNAT	4	0	3	146	3
BNAT	5	1	3	137	4
BNAT	6	2	3	130	5
BPAL	3	0	4	164	2
BPAL	4	0	4	146	3
BPAL	5	0	4	137	4
BPAL	6	1	4	149	5
BPAL	7	2	4	134	6
BPAZ	4	0	3	144	3
BPAZ	5	1	3	141	4
BPAZ	6	1	3	142	5
BSAL	3	0	5	168	2
BSAL	4	0	5	156	3
BSAL	5	0	5	144	4
BSAL	6	0	5	144	5
BSAL	7	1	5	114	6
BSAL	8	2	5	106	7
BSAL	9	3	5	98	8
BSAL	10	4	5	132	9
BSAL	11	5	5	113	10
BSAL	12	6	5	66	11
BSAL	13	7	5	105	12
BSAL	14	8	5	127	13
BSAT	2	0	4	170	1
BSAT	4	0	4	179	3
BSAT	5	0	4	135	4
BSAT	6	1	4	130	5
BSAT	7	2	4	125	6
BSAT	8	3	4	120	7
BSAT	9	4	4	126	8
BSAT	10	5	4	118	9
BSAT	11	6	4	186	10
BSAT	12	7	4	127	11
BSAW	4	0	4	149	3
BSAW	5	0	4	137	4
BSAW	6	1	4	191	5
BSAW	7	2	4	114	6
BSAW	8	3	4	131	7
BSAW	9	4	4	98	8
BSAY	4	0	4	149	3
BSAY	5	0	4	137	4
BSAY	6	1	4	116	5
BSAY	7	2	4	107	6
BSAY	8	3	4	120	7
BSAY	9	4	4	105	8
BSAY	10	5	4	102	9
BSAY	11	6	4	113	10
BSAY	12	7	4	115	11
BSAY	13	8	4	142	12
BSAY	14	9	4	141	13
BTAF	4	0	4	153	3
BTAF	5	0	4	134	4
BTAF	6	1	4	142	5
BTAF	7	2	4	125	6
BTAF	8	2	4	131	7
BTAF	9	3	4	125	8
BTAF	10	4	4	125	9
BTAF	11	5	4	123	10
BTAF	12	6	4	122	11
BTAF	13	7	4	121	12
BTAF	14	8	4	120	13
BTAG	3	0	5	171	2
BTAG	4	0	5	153	3
BTAG	7	1	5	142	6
BTAG	8	2	5	120	7
BTAG	9	3	5	126	8
BTAG	12	3	5	127	11
BTAG	13	3	5	156	12
BTAG	14	4	5	155	13
BTAX	4	0	4	160	3
BTAX	5	0	4	137	4
BTAX	6	1	4	137	5
BTAX	7	2	4	121	6
BTAX	8	3	4	120	7
BTAX	9	4	4	133	8
BTAX	10	5	4	118	9
BTAX	11	6	4	113	10
BTAX	12	7	4	108	11
BTAX	13	8	4	128	12
BTAX	14	9	4	113	13
DFAF	11	0	4	213	3
DFAF	12	0	4	126	4
DFAF	13	1	4	126	5
DFAF	14	2	4	125	6
DFAP	12	0	4	149	4
DFAP	13	1	4	155	5
DFAP	14	2	4	195	6
DLAV	11	0	4	175	3
DLAV	12	0	4	157	4
DMAC	10	0	5	115	2
DMAC	11	0	5	220	3
DMAC	12	0	5	92	4
DMAC	13	0	5	119	5
DMAJ	11	0	5	141	3
DMAJ	12	0	5	126	4
DMAJ	13	0	5	126	5
DMAU	11	0	5	143	3
DMAU	13	0	5	128	5
DMAU	14	1	5	134	6
DMAW	11	0	3	156	3
DMAW	12	1	3	157	4
DMAW	13	2	3	135	5
DMAW	14	3	3	155	6
DNAU	11	0	5	219	3
DNAU	13	0	5	114	5
DNAU	14	1	5	113	6
DPAD	13	0	5	126	5
DPAD	14	1	5	111	6
DPAK	11	0	5	205	3
DPAK	13	0	5	156	5
DPAK	14	1	5	194	6
DPAM	10	0	3	153	2
DPAM	11	0	3	143	3
DPAM	12	1	3	115	4
DPAZ	11	0	4	175	3
DPAZ	12	0	4	120	4
DPAZ	13	1	4	128	5
DPAZ	14	2	4	120	6
DRAR	12	0	4	160	4
DRAR	13	1	4	147	5
DRAR	14	2	4	153	6
DRAZ	11	0	3	200	3
DRAZ	12	1	3	141	4
DRAZ	13	1	3	135	5
DSAJ	10	0	3	123	2
DSAJ	11	0	3	121	3
DSAJ	12	1	3	106	4
DSAJ	13	1	3	112	5
DSAJ	14	2	3	83	6
DTAG	12	1	3	129	4
DTAG	13	1	3	126	5
DTAG	14	2	3	151	6
DUAB	11	0	4	127	3
DUAB	12	0	4	66	4
DUAB	13	1	4	105	5
DUAB	14	2	4	104	6
DUAD	10	0	4	214	2
DUAD	12	0	4	183	4
DUAD	13	1	4	147	5
DUAY	12	0	4	133	4
DUAY	13	1	4	119	5
DUAY	14	2	4	132	6
DVAJ	10	0	3	158	2
DVAJ	11	0	3	143	3
DVAJ	12	1	3	182	4
DVAJ	13	2	3	128	5
DVAJ	14	3	3	152	6
DVAL	14	0	6	160	6
DVAP	11	0	5	149	3
DVAP	12	0	5	134	4
DVAP	13	0	5	121	5
DVAP	14	1	5	104	6
DVAU	10	0	4	167	2
DVAU	11	0	4	123	3
DVAU	12	0	4	115	4
DVAU	13	1	4	128	5
DVAU	14	2	4	104	6
DVAY	10	0	5	193	2
DVAY	11	0	5	143	3
DVAY	12	0	5	120	4
DVAY	13	0	5	156	5
DVAY	14	1	5	127	6
DWAJ	9	0	4	194	1
DWAJ	10	0	4	153	2
DWAJ	11	0	4	123	3
DWAJ	12	0	4	115	4
DWAJ	13	1	4	142	5
DWAJ	14	2	4	141	6
DWAR	11	0	5	149	3
DWAR	12	0	5	120	4
DWAR	13	0	5	121	5
DWAS	13	0	5	135	5
DWAS	14	1	5	134	6
DWAY	11	0	5	175	3
DWAY	13	0	5	147	5
DWAY	14	1	5	151	6
DXAS	11	0	3	137	3
DXAS	12	1	3	183	4
DXAT	13	0	5	135	5
DXAT	14	1	5	148	6
DXAU	10	0	3	173	2
DXAU	11	0	3	143	3
DXAU	12	1	3	120	4
DXAU	13	2	3	142	5
DXAU	14	3	3	134	6
DXAX	11	0	3	149	3
DXAX	12	1	3	129	4
DXAX	13	1	3	140	5
DXAX	14	2	3	125	6
DYAC	12	0	4	121	4
DYAC	13	1	4	133	5
DYAC	14	2	4	125	6
DYAG	11	0	4	163	3
DYAG	12	0	4	183	4
DYAG	13	1	4	126	5
DYAG	14	2	4	104	6
DYAR	12	0	4	153	4
DYAR	13	1	4	126	5
DYAR	14	2	4	146	6
DZAK	13	0	5	112	5
DZAM	11	0	5	193	3
DZAM	13	0	5	162	5
DZAM	14	1	5	134	6
DZAX	11	0	4	171	3
DZAX	12	0	4	129	4
DZAX	13	1	4	128	5
DZAX	14	2	4	113	6
E089	7	1	4	142	6
E089	8	2	4	141	7
E089	9	3	4	138	8
E089	10	4	4	118	9
E089	11	5	4	123	10
E089	13	7	4	135	12
E089	14	8	4	127	13
E373	7	0	6	125	5
E373	8	0	6	148	6
E373	9	1	6	182	7
E373	10	2	6	125	8
E373	11	3	6	129	9
E523	10	0	7	167	7
E523	11	1	7	143	8
E523	12	2	7	127	9
E523	13	2	7	140	10
E523	14	3	7	125	11
E720	6	0	4	144	3
E720	7	0	4	127	4
E720	8	1	4	139	5
E720	9	2	4	131	6
E720	10	3	4	132	7
E720	11	4	4	123	8
E720	12	5	4	122	9
E720	13	6	4	121	10
E720	14	7	4	113	11
EA91	4	0	6	193	6
EA91	5	1	6	143	7
EA91	6	1	6	116	8
EA91	7	2	6	114	9
EA91	8	3	6	104	10
EA91	9	4	6	152	11
EA91	10	5	6	116	12
EA91	11	6	6	106	13
EL52	2	0	4	114	4
EL52	3	1	4	147	5
EL52	4	2	4	111	6
EL52	5	3	4	141	7
EL52	6	3	4	102	8
EL52	7	4	4	133	9
EL52	8	5	4	92	10
EL52	9	6	4	103	11
EL52	10	7	4	123	12
EL52	11	8	4	92	13
ES51	1	0	5	129	3
ES51	2	0	5	149	4
ES51	3	0	5	126	5
ES51	4	1	5	69	6
ES51	5	2	5	54	7
ES51	6	2	5	102	8
ES51	7	3	5	134	9
ES51	8	3	5	141	10
ES51	9	3	5	63	11
ES51	11	3	5	81	13
ET54	3	0	5	119	5
ET54	4	1	5	144	6
ET54	7	2	5	147	9
ET54	9	4	5	168	11
ET54	10	5	5	185	12
ET54	11	6	5	116	13
EU83	8	2	7	127	9
EU83	9	3	7	147	10
EU83	10	4	7	116	11
EU83	11	5	7	135	12
EU83	12	6	7	107	13
GDAP	13	0	4	170	4
GDAP	14	1	4	134	5
GDAX	11	0	4	200	2
GDAX	13	0	4	135	4
GDAX	14	1	4	113	5
GGAC	13	0	4	126	4
GGAC	14	1	4	146	5
GGAV	11	0	4	213	2
GGAV	12	0	4	121	3
GGAV	13	0	4	126	4
GGAV	14	1	4	132	5
GJAT	11	0	3	158	3
GJAT	13	1	3	140	5
GJAT	14	2	3	132	6
GKAB	11	0	5	143	3
GKAB	13	0	5	156	5
GKAB	14	1	5	120	6
GKAV	13	0	5	121	5
GKAV	14	1	5	146	6
GLAC	11	0	4	151	3
GLAC	12	0	4	183	4
GLAC	13	1	4	149	5
GLAC	14	2	4	120	6
GNAG	12	0	4	149	3
GNAG	13	0	4	133	4
GNAG	14	1	4	125	5
GNAR	12	0	4	141	3
GNAR	13	0	4	128	4
GNAR	14	1	4	120	5
GNAU	13	0	4	156	4
GNAU	14	1	4	141	5
GPAD	12	0	4	143	3
GPAD	13	0	4	161	4
GPAD	14	1	4	146	5
GPAR	12	0	4	142	3
GPAR	13	0	4	126	4
GPAR	14	1	4	132	5
GRAC	13	0	4	140	4
GRAS	13	0	4	154	4
GRAS	14	1	4	118	5
GSAN	13	0	4	121	4
GSAN	14	1	4	118	5
GSAW	12	0	4	160	3
GSAW	13	0	4	140	4
GSAW	14	1	4	132	5
GSAY	12	0	4	166	3
GSAY	13	0	4	160	4
GSAY	14	1	4	146	5
GTAJ	13	0	4	133	4
GTAJ	14	1	4	148	5
GTAK	12	0	4	156	3
GTAK	13	0	4	126	4
GTAK	14	1	4	146	5
HAAJ	13	0	3	133	3
HAAJ	14	1	3	160	4
HAAP	13	0	4	140	3
HAAP	14	0	4	146	4
HCAP	13	0	4	121	3
HCAP	14	0	4	183	4
HCAR	13	0	4	142	3
HCAR	14	0	4	148	4
HCAT	11	0	4	172	1
HCAT	13	0	4	156	3
HCAT	14	0	4	148	4
HCAU	13	0	4	183	3
HCAU	14	0	4	159	4
HDAG	14	0	4	139	4
HFAA	13	0	4	162	3
HFAA	14	0	4	146	4
HFAR	13	0	4	140	3
HFAR	14	0	4	146	4
HGAU	13	0	4	162	3
HGAU	14	0	4	146	4
HHAD	13	0	3	133	3
HJAB	14	0	4	155	4
HJAM	13	0	3	140	3
HJAM	14	1	3	139	4
HKAH	13	0	4	126	3
HKAH	14	0	4	152	4
HKAP	13	0	4	140	3
HKAP	14	0	4	139	4
HKAT	13	0	4	147	3
HKAT	14	0	4	151	4
HKAX	12	0	4	161	2
HKAX	13	0	4	161	3
HKAX	14	0	4	132	4
HLAP	13	0	4	156	3
HLAP	14	0	4	187	4
HLAU	14	0	4	146	4
HMAL	14	0	4	196	4
HMAT	13	0	3	153	3
HNAF	13	0	3	154	3
HNAF	14	1	3	132	4
HNAG	13	0	4	142	3
HNAG	14	0	4	134	4
HNAT	13	0	3	177	3
HNAT	14	1	3	148	4
HPAJ	13	0	3	128	3
HPAJ	14	1	3	120	4
HRAA	13	0	3	149	3
HRAA	14	1	3	141	4
HRAS	13	0	4	178	3
HSAJ	14	0	4	134	4
HSAL	13	0	4	176	3
HSAL	14	0	4	141	4
HSAN	13	0	3	140	3
HSAN	14	1	3	125	4
HSAZ	13	0	4	154	3
HSAZ	14	0	4	155	4
HTAS	13	0	4	168	3
HTAS	14	0	4	132	4
HUAF	13	0	4	146	3
HUAF	14	0	4	134	4
HYAR	13	0	4	140	3
HYAR	14	0	4	120	4
HZAB	13	0	3	146	3
HZAB	14	1	3	111	4
HZAD	13	0	4	119	3
HZAD	14	0	4	120	4
HZAK	14	0	4	104	4
HZAS	12	0	4	141	2
HZAS	13	0	4	114	3
HZAS	14	0	4	148	4
HZAV	13	0	4	146	3
HZAV	14	0	4	166	4
KJAJ	14	0	4	148	4
KJAZ	13	0	4	177	3
KJAZ	14	0	4	120	4
LPAJ	13	0	3	182	2
LPAJ	14	0	3	141	3
LPAV	13	0	3	217	2
LPAV	14	0	3	148	3
LRAC	14	0	3	139	3
LSAS	13	0	3	128	2
LSAS	14	0	3	134	3
PE5	4	0	5	167	5
PE5	7	1	5	134	8
PE5	8	2	5	111	9
PE5	9	3	5	152	10
PE5	10	4	5	129	11
PE5	11	5	5	100	12
PE5	12	6	5	121	13
PH0	6	2	4	183	7
PH0	7	3	4	140	8
PH0	8	4	4	141	9
RT0	7	1	7	154	8
RT0	8	2	7	120	9
RT0	9	3	7	147	10
RT0	10	4	7	130	11
RT0	11	5	7	121	12
THV	9	0	4	158	4
THV	12	1	4	108	7
THV	13	2	4	156	8
THV	14	3	4	113	9
TU9	3	0	6	217	3
TU9	4	0	6	144	4
TU9	7	1	6	154	7
TU9	8	2	6	141	8
TU9	9	3	6	103	9
TU9	10	4	6	116	10
TU9	11	5	6	100	11
TU9	12	6	6	101	12
TU9	13	7	6	133	13

## Sheet: table 2 lower right panel 
identity	year	Exp	α	arrival date	ageclass
AAAX	3	0	3	146	3
AAAX	4	1	3	144	4
AAAZ	3	0	3	132	3
AAAZ	4	1	3	96	4
AAAZ	5	2	3	109	5
AAAZ	6	3	3	107	6
AAAZ	7	4	3	120	7
AAAZ	8	5	3	147	8
AAAZ	9	6	3	104	9
ABAD	5	1	4	144	5
ABAD	6	2	4	127	6
ABAD	7	3	4	120	7
ABAJ	4	0	4	134	4
ABAJ	5	1	4	116	5
ABAJ	6	2	4	79	6
ABAJ	7	3	4	132	7
ABAJ	8	4	4	126	8
ABAJ	9	5	4	90	9
ABAJ	10	6	4	200	10
ABAJ	11	7	4	93	11
ABAJ	12	7	4	182	12
ABAR	4	0	4	137	4
ABAR	5	1	4	116	5
ABAR	6	2	4	134	6
ABAR	7	3	4	120	7
ABAR	8	4	4	125	8
ABAR	9	5	4	122	9
ABAR	10	6	4	109	10
ABAR	11	7	4	113	11
ABAZ	7	1	6	118	7
ABAZ	8	1	6	147	8
ACAJ	4	0	4	159	4
ACAJ	5	1	4	123	5
ACAJ	6	2	4	114	6
ACAJ	7	3	4	120	7
ACAJ	8	4	4	98	8
ACAL	3	0	3	104	3
ACAL	4	1	3	96	4
ACAL	5	2	3	109	5
ADAF	4	0	4	157	4
ADAF	5	1	4	137	5
ADAF	6	2	4	127	6
ADAF	7	3	4	120	7
ADAF	8	4	4	125	8
ADAF	9	5	4	118	9
ADAF	10	6	4	114	10
ADAF	12	7	4	114	12
ADAF	13	8	4	141	13
ADAV	5	0	5	116	5
ADAW	4	0	4	180	4
ADAW	5	1	4	130	5
AFAF	4	0	4	144	4
AFAF	5	1	4	137	5
AFAF	6	2	4	133	6
AFAF	7	3	4	141	7
AFAN	4	0	4	135	4
AFAN	5	1	4	123	5
AFAN	6	2	4	114	6
AFAN	7	3	4	78	7
AFAN	8	4	4	96	8
AFAP	4	0	4	144	4
AFAP	5	1	4	109	5
AFAP	6	2	4	111	6
AFAP	7	3	4	120	7
AFAP	8	4	4	117	8
AFAP	10	6	4	186	10
AFAP	12	7	4	149	12
AFAP	13	8	4	194	13
AFAR	5	0	5	207	5
AFAR	6	1	5	142	6
AFAR	7	2	5	141	7
AFAR	8	3	5	138	8
AFAR	9	4	5	146	9
AFAR	10	5	5	143	10
AFAR	12	6	5	142	12
AFAR	13	7	5	155	13
AFAS	4	0	4	82	4
AFAS	5	1	4	109	5
AFAS	6	2	4	118	6
AFAS	7	3	4	141	7
AFAS	8	4	4	117	8
AFAS	9	5	4	111	9
AFAS	10	6	4	99	10
AFAS	11	7	4	120	11
AFAS	12	8	4	135	12
AFAS	13	9	4	148	13
AFAW	4	0	4	135	4
AFAW	5	1	4	116	5
AFAW	6	2	4	107	6
AFAW	7	3	4	106	7
AFAW	8	4	4	147	8
AGAB	4	0	4	19	4
AGAB	5	1	4	102	5
AGAB	6	2	4	79	6
AGAG	4	0	4	137	4
AGAG	5	1	4	130	5
AGAG	6	2	4	134	6
AGAG	7	3	4	120	7
AGAG	8	4	4	147	8
AGAG	9	5	4	159	9
AGAG	10	6	4	116	10
AGAG	11	7	4	114	11
AGAG	12	8	4	133	12
AGAG	13	9	4	118	13
AGAH	4	0	4	141	4
AGAH	5	1	4	144	5
AHAH	5	0	5	116	5
AHAJ	3	0	3	139	3
AHAJ	4	1	3	141	4
AHAJ	5	1	3	142	5
AHAJ	6	2	3	140	6
AHAL	4	0	4	144	4
AHAL	5	1	4	130	5
AHAL	6	2	4	128	6
AHAL	7	3	4	155	7
AHAS	4	0	4	159	4
AHAS	5	1	4	137	5
AHAS	6	2	4	149	6
AHAS	7	3	4	132	7
AHAS	8	4	4	152	8
AHAS	9	5	4	125	9
AHAS	10	6	4	116	10
AHAS	12	7	4	114	12
AHAW	4	0	4	131	4
AHAW	5	1	4	130	5
AHAW	6	2	4	118	6
AHAW	7	3	4	159	7
AHAW	8	4	4	147	8
AHAZ	4	0	4	157	4
AHAZ	5	1	4	149	5
AHAZ	6	2	4	142	6
AHAZ	7	3	4	153	7
AJAA	5	0	5	137	5
AJAA	6	1	5	135	6
AJAA	7	2	5	132	7
AJAA	8	3	5	167	8
AJAA	9	4	5	132	9
AJAA	10	5	5	129	10
AJAA	11	6	5	197	11
AJAA	12	7	5	149	12
AJAA	13	8	5	141	13
AJAD	5	0	5	123	5
AJAD	6	1	5	111	6
AJAD	7	2	5	120	7
AJAD	8	3	5	105	8
AJAD	9	4	5	118	9
AJAH	5	1	4	116	5
AJAH	6	2	4	127	6
AJAH	7	3	4	120	7
AJAJ	4	0	4	144	4
AJAJ	5	1	4	130	5
AJAJ	8	2	4	201	8
AJAJ	9	3	4	125	9
AJAJ	10	4	4	116	10
AJAJ	11	5	4	115	11
AJAJ	12	5	4	142	12
AJAJ	13	6	4	148	13
AJAK	5	0	5	151	5
AJAK	6	1	5	125	6
AJAK	7	2	5	141	7
AJAK	8	3	5	125	8
AJAK	9	4	5	102	9
ALAJ	5	0	5	156	5
ALAK	3	0	3	160	3
ALAK	4	1	3	144	4
ALAK	5	2	3	109	5
ALAK	6	3	3	107	6
ALAK	7	4	3	85	7
ALAK	8	5	3	98	8
ALAK	10	6	3	102	10
ALAK	11	7	3	168	11
ALAK	12	8	3	156	12
ALAK	13	9	3	113	13
ALAP	5	0	5	123	5
ALAP	6	1	5	114	6
ALAP	7	2	5	139	7
AMAD	5	0	5	156	5
AMAD	6	1	5	114	6
AMAD	7	2	5	141	7
AMAD	8	3	5	105	8
AMAD	9	4	5	123	9
AMAK	4	0	4	144	4
AMAK	5	1	4	116	5
AMAK	6	2	4	127	6
AMAK	7	3	4	139	7
AMAK	8	4	4	126	8
AMAK	9	5	4	132	9
AMAK	10	6	4	102	10
AMAL	4	0	4	137	4
AMAL	5	1	4	130	5
AMAL	6	2	4	149	6
AMAL	7	3	4	127	7
AMAL	8	4	4	126	8
AMAL	9	5	4	111	9
AMAL	10	6	4	129	10
AMAL	11	7	4	114	11
AMAL	12	7	4	114	12
AMAL	13	8	4	104	13
AMAX	4	0	4	135	4
AMAX	5	1	4	116	5
AMAX	6	2	4	100	6
AMAX	7	3	4	132	7
AMAX	8	4	4	103	8
AMAX	9	5	4	116	9
AMAX	10	6	4	102	10
AMAX	11	7	4	86	11
ANAB	5	0	5	109	5
ANAB	6	1	5	111	6
ANAB	7	2	5	99	7
ANAB	9	3	5	104	9
ANAB	10	4	5	151	10
ANAB	11	5	5	127	11
ANAD	7	1	5	118	7
ANAD	8	2	5	161	8
ANAN	4	0	4	134	4
ANAN	5	1	4	116	5
ANAN	6	2	4	121	6
ANAN	7	3	4	120	7
ANAN	8	4	4	98	8
ANAN	9	5	4	71	9
ANAN	10	6	4	102	10
ANAN	11	7	4	94	11
ANAN	12	8	4	149	12
ANAN	13	9	4	113	13
ANAS	4	0	4	141	4
ANAS	5	1	4	102	5
ANAS	6	2	4	65	6
ANAS	7	3	4	78	7
ANAS	8	4	4	77	8
ANAW	4	0	4	135	4
ANAW	5	1	4	130	5
APAH	3	0	3	139	3
APAH	4	1	3	134	4
APAU	4	0	4	141	4
APAU	5	1	4	137	5
APAU	6	2	4	118	6
ARAH	5	0	5	144	5
ARAH	6	1	5	156	6
ARAH	7	2	5	159	7
ARAH	8	3	5	140	8
ARAH	9	4	5	136	9
ASAH	4	0	4	135	4
ASAH	5	1	4	130	5
ASAH	6	2	4	128	6
ASAH	7	3	4	120	7
ASAH	8	4	4	147	8
ASAH	9	5	4	146	9
ASAH	10	6	4	129	10
ASAH	11	7	4	115	11
ASAH	12	7	4	135	12
ASAH	13	8	4	134	13
ASAP	3	0	3	149	3
ASAP	4	1	3	135	4
ASAP	5	2	3	130	5
ASAP	6	3	3	114	6
ASAP	7	4	3	120	7
ASAP	8	5	3	117	8
ASAP	9	6	3	122	9
ASAP	10	7	3	123	10
ASAP	11	8	3	115	11
ASAP	12	9	3	128	12
ASAP	13	10	3	120	13
ASAX	3	0	3	146	3
ASAX	4	1	3	137	4
ASAX	5	1	3	137	5
ASAX	6	2	3	135	6
ASAX	7	3	3	139	7
ASAX	8	4	3	131	8
ASAX	9	5	3	125	9
ASAX	10	6	3	109	10
ASAX	11	7	3	114	11
ASAX	12	8	3	146	12
ASAX	13	9	3	134	13
ASAY	5	0	5	137	5
ASAY	6	1	5	121	6
ASAY	7	2	5	120	7
ASAY	8	3	5	131	8
ASAY	9	4	5	125	9
ASAY	10	5	5	135	10
ASAY	11	6	5	114	11
ASAY	12	7	5	126	12
AUAA	4	0	4	141	4
AUAA	5	1	4	137	5
AUAA	6	2	4	127	6
AUAA	7	3	4	127	7
AUAP	4	0	4	141	4
AUAP	5	1	4	130	5
AUAP	6	2	4	135	6
AUAP	7	3	4	120	7
AUAP	8	4	4	145	8
AUAP	9	5	4	125	9
AUAP	10	6	4	129	10
AUAP	11	7	4	108	11
AUAP	12	7	4	112	12
AUAP	13	8	4	132	13
AUAV	5	0	5	102	5
AUAV	6	1	5	107	6
AUAV	7	2	5	120	7
AUAV	8	3	5	105	8
AUAV	9	4	5	97	9
AUAV	10	5	5	100	10
AUAV	11	6	5	94	11
AWAF	4	0	4	145	4
AWAF	5	1	4	137	5
AWAF	6	2	4	133	6
AWAF	7	3	4	132	7
AWAF	8	4	4	126	8
AWAN	5	0	5	130	5
AWAN	6	1	5	127	6
AWAN	7	2	5	125	7
AWAN	8	3	5	117	8
AWAR	3	0	3	139	3
AWAR	4	1	3	137	4
AWAR	7	2	3	182	7
AWAR	8	3	3	96	8
AWAR	9	4	3	83	9
AWAR	10	5	3	113	10
AWAR	11	6	3	94	11
AWAR	12	7	3	112	12
AWAR	13	8	3	120	13
AWAU	4	0	4	153	4
AWAU	5	1	4	137	5
AWAU	6	2	4	134	6
AWAU	7	3	4	173	7
AXAG	3	0	3	139	3
AXAG	4	1	3	135	4
AXAG	5	2	3	116	5
AXAG	6	3	3	107	6
AXAG	7	4	3	118	7
BAAG	3	0	3	146	3
BAAG	4	1	3	137	4
BAAG	5	2	3	130	5
BAAG	6	3	3	121	6
BAAK	4	0	4	137	4
BAAK	5	1	4	102	5
BAAK	6	2	4	107	6
BAAK	7	3	4	15	7
BAAK	8	4	4	84	8
BAAK	9	5	4	97	9
BAAK	10	6	4	102	10
BAAK	11	7	4	94	11
BBAB	3	0	3	125	3
BBAB	4	1	3	141	4
BBAB	5	1	3	116	5
BBAB	6	2	3	100	6
BBAB	7	3	3	97	7
BBAB	8	4	3	96	8
BBAB	9	5	3	116	9
BBAF	4	0	4	153	4
BBAF	5	1	4	137	5
BBAF	6	2	4	128	6
BBAF	7	3	4	168	7
BBAF	8	4	4	140	8
BBAF	9	5	4	129	9
BBAF	10	6	4	121	10
BBAF	11	7	4	166	11
BBAF	12	8	4	133	12
BBAF	13	9	4	132	13
BBAT	5	0	5	116	5
BBAT	6	1	5	121	6
BBAT	7	2	5	99	7
BBAT	8	3	5	145	8
BBAT	9	4	5	104	9
BBAX	5	1	4	123	5
BBAX	6	2	4	111	6
BBAX	7	3	4	141	7
BBAX	8	4	4	112	8
BBAX	9	5	4	102	9
BBAX	10	6	4	116	10
BBAX	11	7	4	86	11
BBAX	12	8	4	114	12
BBAY	5	0	5	142	5
BBAY	6	1	5	128	6
BCAR	3	0	3	153	3
BDAN	5	0	5	123	5
BDAN	6	1	5	121	6
BDAN	7	2	5	139	7
BDAN	8	3	5	145	8
BDAN	9	4	5	104	9
BDAN	10	5	5	106	10
BDAN	11	6	5	92	11
BDAN	12	6	5	126	12
BDAP	4	0	4	135	4
BDAP	5	1	4	123	5
BDAP	6	2	4	107	6
BDAP	7	3	4	132	7
BDAU	5	0	5	123	5
BDAU	6	1	5	118	6
BJAA	4	0	4	144	4
BJAA	5	1	4	130	5
BJAA	6	2	4	128	6
BJAA	7	3	4	120	7
BJAA	8	4	4	147	8
BJAA	9	5	4	167	9
BJAA	10	6	4	113	10
BJAA	11	7	4	114	11
BJAA	12	8	4	126	12
BJAA	13	9	4	132	13
BJAZ	5	0	5	130	5
BJAZ	6	1	5	121	6
BJAZ	7	2	5	120	7
BJAZ	8	3	5	145	8
BJAZ	9	4	5	137	9
BKAA	3	0	3	149	3
BKAA	4	1	3	137	4
BKAN	4	0	4	137	4
BKAN	5	1	4	123	5
BKAX	3	0	3	151	3
BKAX	4	1	3	141	4
BKAX	5	2	3	127	5
BKAX	6	3	3	114	6
BLAD	4	0	4	137	4
BLAD	5	1	4	116	5
BLAD	6	2	4	135	6
BLAD	7	3	4	120	7
BLAD	8	4	4	125	8
BLAD	9	5	4	109	9
BLAD	10	6	4	109	10
BLAD	11	7	4	114	11
BLAD	12	7	4	128	12
BLAD	13	8	4	120	13
BLAH	4	0	4	141	4
BLAH	5	1	4	156	5
BLAH	6	2	4	121	6
BLAH	7	3	4	120	7
BLAH	8	4	4	126	8
BLAH	9	5	4	111	9
BLAH	10	6	4	116	10
BLAN	6	0	6	156	6
BLAR	4	0	4	143	4
BLAR	5	1	4	149	5
BLAR	6	2	4	134	6
BLAR	7	3	4	139	7
BLAR	8	4	4	138	8
BLAR	9	5	4	125	9
BLAR	10	6	4	135	10
BLAR	11	7	4	122	11
BLAR	12	8	4	125	12
BLAR	13	9	4	120	13
BMAA	3	0	3	125	3
BMAA	4	1	3	135	4
BMAA	5	2	3	130	5
BMAN	5	0	5	137	5
BMAN	6	1	5	121	6
BMAN	7	2	5	132	7
BMAN	8	3	5	138	8
BMAN	9	4	5	123	9
BMAN	10	5	5	116	10
BMAN	11	6	5	120	11
BMAN	12	7	5	128	12
BMAN	13	8	5	127	13
BMAT	4	0	4	144	4
BMAT	5	1	4	149	5
BMAT	6	1	4	125	6
BMAT	7	2	4	125	7
BMAT	8	3	4	105	8
BNAC	3	0	3	146	3
BNAC	4	1	3	141	4
BNAC	5	2	3	116	5
BNAC	6	3	3	111	6
BNAC	7	4	3	104	7
BNAC	8	5	3	98	8
BNAH	4	0	4	144	4
BNAH	5	1	4	130	5
BNAH	6	2	4	121	6
BNAH	7	3	4	160	7
BNAH	8	4	4	167	8
BNAH	9	5	4	153	9
BNAH	10	6	4	163	10
BNAH	12	7	4	182	12
BNAH	13	8	4	182	13
BNAR	4	0	4	137	4
BNAR	5	1	4	123	5
BNAR	6	2	4	121	6
BNAR	7	3	4	155	7
BNAR	8	4	4	131	8
BNAR	9	5	4	136	9
BNAT	3	0	3	146	3
BNAT	4	1	3	137	4
BNAT	5	2	3	130	5
BPAL	4	0	4	137	4
BPAL	5	1	4	149	5
BPAL	6	2	4	134	6
BPAZ	3	0	3	144	3
BPAZ	4	1	3	141	4
BPAZ	5	1	3	142	5
BSAL	5	0	5	144	5
BSAL	6	1	5	114	6
BSAL	7	2	5	106	7
BSAL	8	3	5	98	8
BSAL	9	4	5	132	9
BSAL	10	5	5	113	10
BSAL	11	6	5	66	11
BSAL	12	7	5	105	12
BSAL	13	8	5	127	13
BSAT	4	0	4	135	4
BSAT	5	1	4	130	5
BSAT	6	2	4	125	6
BSAT	7	3	4	120	7
BSAT	8	4	4	126	8
BSAT	9	5	4	118	9
BSAT	10	6	4	186	10
BSAT	11	7	4	127	11
BSAW	4	0	4	137	4
BSAW	5	1	4	191	5
BSAW	6	2	4	114	6
BSAW	7	3	4	131	7
BSAW	8	4	4	98	8
BSAY	4	0	4	137	4
BSAY	5	1	4	116	5
BSAY	6	2	4	107	6
BSAY	7	3	4	120	7
BSAY	8	4	4	105	8
BSAY	9	5	4	102	9
BSAY	10	6	4	113	10
BSAY	11	7	4	115	11
BSAY	12	8	4	142	12
BSAY	13	9	4	141	13
BTAF	4	0	4	134	4
BTAF	5	1	4	142	5
BTAF	6	2	4	125	6
BTAF	7	2	4	131	7
BTAF	8	3	4	125	8
BTAF	9	4	4	125	9
BTAF	10	5	4	123	10
BTAF	11	6	4	122	11
BTAF	12	7	4	121	12
BTAF	13	8	4	120	13
BTAG	6	1	5	142	6
BTAG	7	2	5	120	7
BTAG	8	3	5	126	8
BTAG	11	3	5	127	11
BTAG	12	3	5	156	12
BTAG	13	4	5	155	13
BTAX	4	0	4	137	4
BTAX	5	1	4	137	5
BTAX	6	2	4	121	6
BTAX	7	3	4	120	7
BTAX	8	4	4	133	8
BTAX	9	5	4	118	9
BTAX	10	6	4	113	10
BTAX	11	7	4	108	11
BTAX	12	8	4	128	12
BTAX	13	9	4	113	13
DFAF	11	0	4	126	4
DFAF	12	1	4	126	5
DFAF	13	2	4	125	6
DFAP	11	0	4	149	4
DFAP	12	1	4	155	5
DFAP	13	2	4	195	6
DLAV	11	0	4	157	4
DMAC	12	0	5	119	5
DMAJ	12	0	5	126	5
DMAU	12	0	5	128	5
DMAU	13	1	5	134	6
DMAW	10	0	3	156	3
DMAW	11	1	3	157	4
DMAW	12	2	3	135	5
DMAW	13	3	3	155	6
DNAU	12	0	5	114	5
DNAU	13	1	5	113	6
DPAD	12	0	5	126	5
DPAD	13	1	5	111	6
DPAK	12	0	5	156	5
DPAK	13	1	5	194	6
DPAM	10	0	3	143	3
DPAM	11	1	3	115	4
DPAZ	11	0	4	120	4
DPAZ	12	1	4	128	5
DPAZ	13	2	4	120	6
DRAR	11	0	4	160	4
DRAR	12	1	4	147	5
DRAR	13	2	4	153	6
DRAZ	10	0	3	200	3
DRAZ	11	1	3	141	4
DRAZ	12	1	3	135	5
DSAJ	10	0	3	121	3
DSAJ	11	1	3	106	4
DSAJ	12	1	3	112	5
DSAJ	13	2	3	83	6
DTAG	11	1	3	129	4
DTAG	12	1	3	126	5
DTAG	13	2	3	151	6
DUAB	11	0	4	66	4
DUAB	12	1	4	105	5
DUAB	13	2	4	104	6
DUAD	11	0	4	183	4
DUAD	12	1	4	147	5
DUAY	11	0	4	133	4
DUAY	12	1	4	119	5
DUAY	13	2	4	132	6
DVAJ	10	0	3	143	3
DVAJ	11	1	3	182	4
DVAJ	12	2	3	128	5
DVAJ	13	3	3	152	6
DVAL	13	0	6	160	6
DVAP	12	0	5	121	5
DVAP	13	1	5	104	6
DVAU	11	0	4	115	4
DVAU	12	1	4	128	5
DVAU	13	2	4	104	6
DVAY	12	0	5	156	5
DVAY	13	1	5	127	6
DWAJ	11	0	4	115	4
DWAJ	12	1	4	142	5
DWAJ	13	2	4	141	6
DWAR	12	0	5	121	5
DWAS	12	0	5	135	5
DWAS	13	1	5	134	6
DWAY	12	0	5	147	5
DWAY	13	1	5	151	6
DXAS	10	0	3	137	3
DXAS	11	1	3	183	4
DXAT	12	0	5	135	5
DXAT	13	1	5	148	6
DXAU	10	0	3	143	3
DXAU	11	1	3	120	4
DXAU	12	2	3	142	5
DXAU	13	3	3	134	6
DXAX	10	0	3	149	3
DXAX	11	1	3	129	4
DXAX	12	1	3	140	5
DXAX	13	2	3	125	6
DYAC	11	0	4	121	4
DYAC	12	1	4	133	5
DYAC	13	2	4	125	6
DYAG	11	0	4	183	4
DYAG	12	1	4	126	5
DYAG	13	2	4	104	6
DYAR	11	0	4	153	4
DYAR	12	1	4	126	5
DYAR	13	2	4	146	6
DZAK	12	0	5	112	5
DZAM	12	0	5	162	5
DZAM	13	1	5	134	6
DZAX	11	0	4	129	4
DZAX	12	1	4	128	5
DZAX	13	2	4	113	6
E089	6	1	4	142	6
E089	7	2	4	141	7
E089	8	3	4	138	8
E089	9	4	4	118	9
E089	10	5	4	123	10
E089	12	7	4	135	12
E089	13	8	4	127	13
E373	7	0	6	148	6
E373	8	1	6	182	7
E373	9	2	6	125	8
E373	10	3	6	129	9
E523	9	0	7	167	7
E523	10	1	7	143	8
E523	11	2	7	127	9
E523	12	2	7	140	10
E523	13	3	7	125	11
E720	6	0	4	127	4
E720	7	1	4	139	5
E720	8	2	4	131	6
E720	9	3	4	132	7
E720	10	4	4	123	8
E720	11	5	4	122	9
E720	12	6	4	121	10
E720	13	7	4	113	11
EA91	3	0	6	193	6
EA91	4	1	6	143	7
EA91	5	1	6	116	8
EA91	6	2	6	114	9
EA91	7	3	6	104	10
EA91	8	4	6	152	11
EA91	9	5	6	116	12
EA91	10	6	6	106	13
EL52	1	0	4	114	4
EL52	2	1	4	147	5
EL52	3	2	4	111	6
EL52	4	3	4	141	7
EL52	5	3	4	102	8
EL52	6	4	4	133	9
EL52	7	5	4	92	10
EL52	8	6	4	103	11
EL52	9	7	4	123	12
EL52	10	8	4	92	13
ES51	2	0	5	126	5
ES51	3	1	5	69	6
ES51	4	2	5	54	7
ES51	5	2	5	102	8
ES51	6	3	5	134	9
ES51	7	3	5	141	10
ES51	8	3	5	63	11
ES51	10	3	5	81	13
ET54	2	0	5	119	5
ET54	3	1	5	144	6
ET54	6	2	5	147	9
ET54	8	4	5	168	11
ET54	9	5	5	185	12
ET54	10	6	5	116	13
EU83	7	2	7	127	9
EU83	8	3	7	147	10
EU83	9	4	7	116	11
EU83	10	5	7	135	12
EU83	11	6	7	107	13
GDAP	12	0	4	170	4
GDAP	13	1	4	134	5
GDAX	12	0	4	135	4
GDAX	13	1	4	113	5
GGAC	12	0	4	126	4
GGAC	13	1	4	146	5
GGAV	12	0	4	126	4
GGAV	13	1	4	132	5
GJAT	10	0	3	158	3
GJAT	12	1	3	140	5
GJAT	13	2	3	132	6
GKAB	12	0	5	156	5
GKAB	13	1	5	120	6
GKAV	12	0	5	121	5
GKAV	13	1	5	146	6
GLAC	11	0	4	183	4
GLAC	12	1	4	149	5
GLAC	13	2	4	120	6
GNAG	12	0	4	133	4
GNAG	13	1	4	125	5
GNAR	12	0	4	128	4
GNAR	13	1	4	120	5
GNAU	12	0	4	156	4
GNAU	13	1	4	141	5
GPAD	12	0	4	161	4
GPAD	13	1	4	146	5
GPAR	12	0	4	126	4
GPAR	13	1	4	132	5
GRAC	12	0	4	140	4
GRAS	12	0	4	154	4
GRAS	13	1	4	118	5
GSAN	12	0	4	121	4
GSAN	13	1	4	118	5
GSAW	12	0	4	140	4
GSAW	13	1	4	132	5
GSAY	12	0	4	160	4
GSAY	13	1	4	146	5
GTAJ	12	0	4	133	4
GTAJ	13	1	4	148	5
GTAK	12	0	4	126	4
GTAK	13	1	4	146	5
HAAJ	12	0	3	133	3
HAAJ	13	1	3	160	4
HAAP	13	0	4	146	4
HCAP	13	0	4	183	4
HCAR	13	0	4	148	4
HCAT	13	0	4	148	4
HCAU	13	0	4	159	4
HDAG	13	0	4	139	4
HFAA	13	0	4	146	4
HFAR	13	0	4	146	4
HGAU	13	0	4	146	4
HHAD	12	0	3	133	3
HJAB	13	0	4	155	4
HJAM	12	0	3	140	3
HJAM	13	1	3	139	4
HKAH	13	0	4	152	4
HKAP	13	0	4	139	4
HKAT	13	0	4	151	4
HKAX	13	0	4	132	4
HLAP	13	0	4	187	4
HLAU	13	0	4	146	4
HMAL	13	0	4	196	4
HMAT	12	0	3	153	3
HNAF	12	0	3	154	3
HNAF	13	1	3	132	4
HNAG	13	0	4	134	4
HNAT	12	0	3	177	3
HNAT	13	1	3	148	4
HPAJ	12	0	3	128	3
HPAJ	13	1	3	120	4
HRAA	12	0	3	149	3
HRAA	13	1	3	141	4
HSAJ	13	0	4	134	4
HSAL	13	0	4	141	4
HSAN	12	0	3	140	3
HSAN	13	1	3	125	4
HSAZ	13	0	4	155	4
HTAS	13	0	4	132	4
HUAF	13	0	4	134	4
HYAR	13	0	4	120	4
HZAB	12	0	3	146	3
HZAB	13	1	3	111	4
HZAD	13	0	4	120	4
HZAK	13	0	4	104	4
HZAS	13	0	4	148	4
HZAV	13	0	4	166	4
KJAJ	13	0	4	148	4
KJAZ	13	0	4	120	4
LPAJ	13	0	3	141	3
LPAV	13	0	3	148	3
LRAC	13	0	3	139	3
LSAS	13	0	3	134	3
PE5	3	0	5	167	5
PE5	6	1	5	134	8
PE5	7	2	5	111	9
PE5	8	3	5	152	10
PE5	9	4	5	129	11
PE5	10	5	5	100	12
PE5	11	6	5	121	13
PH0	5	2	4	183	7
PH0	6	3	4	140	8
PH0	7	4	4	141	9
RT0	6	1	7	154	8
RT0	7	2	7	120	9
RT0	8	3	7	147	10
RT0	9	4	7	130	11
RT0	10	5	7	121	12
THV	8	0	4	158	4
THV	11	1	4	108	7
THV	12	2	4	156	8
THV	13	3	4	113	9
TU9	6	1	6	154	7
TU9	7	2	6	141	8
TU9	8	3	6	103	9
TU9	9	4	6	116	10
TU9	10	5	6	100	11
TU9	11	6	6	101	12
TU9	12	7	6	133	13

## Sheet: table 3 left panel
identity	Exp	year	arrival date	PROS	α	ageclass
AAAX	0	3	146	1	3	3
AAAX	1	4	144	1	3	4
AAAZ	0	3	132	1	3	3
AAAZ	1	4	96	1	3	4
AAAZ	2	5	109	1	3	5
AAAZ	3	6	107	1	3	6
AAAZ	4	7	120	1	3	7
AAAZ	5	8	147	1	3	8
AAAZ	6	9	104	1	3	9
ABAD	1	5	144	1	4	5
ABAD	2	6	127	1	4	6
ABAD	3	7	120	1	4	7
ABAJ	0	4	134	1	4	4
ABAJ	1	5	116	1	4	5
ABAJ	2	6	79	1	4	6
ABAJ	3	7	132	1	4	7
ABAJ	4	8	126	1	4	8
ABAJ	5	9	90	1	4	9
ABAJ	6	10	200	1	4	10
ABAJ	7	11	93	1	4	11
ABAJ	7	12	182	1	4	12
ABAR	0	4	137	1	4	4
ABAR	1	5	116	1	4	5
ABAR	2	6	134	1	4	6
ABAR	3	7	120	1	4	7
ABAR	4	8	125	1	4	8
ABAR	5	9	122	1	4	9
ABAR	6	10	109	1	4	10
ABAR	7	11	113	1	4	11
ABAZ	1	7	118	1	6	7
ABAZ	1	8	147	1	6	8
ACAJ	0	4	159	1	4	4
ACAJ	1	5	123	1	4	5
ACAJ	2	6	114	1	4	6
ACAJ	3	7	120	1	4	7
ACAJ	4	8	98	1	4	8
ACAL	0	3	104	1	3	3
ACAL	1	4	96	1	3	4
ACAL	2	5	109	1	3	5
ADAF	0	4	157	1	4	4
ADAF	1	5	137	1	4	5
ADAF	2	6	127	1	4	6
ADAF	3	7	120	1	4	7
ADAF	4	8	125	1	4	8
ADAF	5	9	118	1	4	9
ADAF	6	10	114	1	4	10
ADAF	7	12	114	1	4	12
ADAF	8	13	141	1	4	13
ADAV	0	5	116	1	5	5
ADAW	0	4	180	1	4	4
ADAW	1	5	130	1	4	5
AFAF	0	4	144	1	4	4
AFAF	1	5	137	1	4	5
AFAF	2	6	133	1	4	6
AFAF	3	7	141	1	4	7
AFAN	0	4	135	1	4	4
AFAN	1	5	123	1	4	5
AFAN	2	6	114	1	4	6
AFAN	3	7	78	1	4	7
AFAN	4	8	96	1	4	8
AFAP	0	4	144	1	4	4
AFAP	1	5	109	1	4	5
AFAP	2	6	111	1	4	6
AFAP	3	7	120	1	4	7
AFAP	4	8	117	1	4	8
AFAP	6	10	186	1	4	10
AFAP	7	12	149	1	4	12
AFAP	8	13	194	1	4	13
AFAR	0	5	207	0	5	5
AFAR	1	6	142	0	5	6
AFAR	2	7	141	0	5	7
AFAR	3	8	138	0	5	8
AFAR	4	9	146	0	5	9
AFAR	5	10	143	0	5	10
AFAR	6	12	142	0	5	12
AFAR	7	13	155	0	5	13
AFAS	0	4	82	1	4	4
AFAS	1	5	109	1	4	5
AFAS	2	6	118	1	4	6
AFAS	3	7	141	1	4	7
AFAS	4	8	117	1	4	8
AFAS	5	9	111	1	4	9
AFAS	6	10	99	1	4	10
AFAS	7	11	120	1	4	11
AFAS	8	12	135	1	4	12
AFAS	9	13	148	1	4	13
AFAW	0	4	135	1	4	4
AFAW	1	5	116	1	4	5
AFAW	2	6	107	1	4	6
AFAW	3	7	106	1	4	7
AFAW	4	8	147	1	4	8
AGAB	0	4	19	1	4	4
AGAB	1	5	102	1	4	5
AGAB	2	6	79	1	4	6
AGAG	0	4	137	1	4	4
AGAG	1	5	130	1	4	5
AGAG	2	6	134	1	4	6
AGAG	3	7	120	1	4	7
AGAG	4	8	147	1	4	8
AGAG	5	9	159	1	4	9
AGAG	6	10	116	1	4	10
AGAG	7	11	114	1	4	11
AGAG	8	12	133	1	4	12
AGAG	9	13	118	1	4	13
AGAH	0	4	141	1	4	4
AGAH	1	5	144	1	4	5
AHAH	0	5	116	1	5	5
AHAJ	0	3	139	1	3	3
AHAJ	1	4	141	1	3	4
AHAJ	1	5	142	1	3	5
AHAJ	2	6	140	1	3	6
AHAL	0	4	144	1	4	4
AHAL	1	5	130	1	4	5
AHAL	2	6	128	1	4	6
AHAL	3	7	155	1	4	7
AHAS	0	4	159	1	4	4
AHAS	1	5	137	1	4	5
AHAS	2	6	149	1	4	6
AHAS	3	7	132	1	4	7
AHAS	4	8	152	1	4	8
AHAS	5	9	125	1	4	9
AHAS	6	10	116	1	4	10
AHAS	7	12	114	1	4	12
AHAW	0	4	131	1	4	4
AHAW	1	5	130	1	4	5
AHAW	2	6	118	1	4	6
AHAW	3	7	159	1	4	7
AHAW	4	8	147	1	4	8
AHAZ	0	4	157	1	4	4
AHAZ	1	5	149	1	4	5
AHAZ	2	6	142	1	4	6
AHAZ	3	7	153	1	4	7
AJAA	0	5	137	1	5	5
AJAA	1	6	135	1	5	6
AJAA	2	7	132	1	5	7
AJAA	3	8	167	1	5	8
AJAA	4	9	132	1	5	9
AJAA	5	10	129	1	5	10
AJAA	6	11	197	1	5	11
AJAA	7	12	149	1	5	12
AJAA	8	13	141	1	5	13
AJAD	0	5	123	1	5	5
AJAD	1	6	111	1	5	6
AJAD	2	7	120	1	5	7
AJAD	3	8	105	1	5	8
AJAD	4	9	118	1	5	9
AJAH	1	5	116	1	4	5
AJAH	2	6	127	1	4	6
AJAH	3	7	120	1	4	7
AJAJ	0	4	144	1	4	4
AJAJ	1	5	130	1	4	5
AJAJ	2	8	201	1	4	8
AJAJ	3	9	125	1	4	9
AJAJ	4	10	116	1	4	10
AJAJ	5	11	115	1	4	11
AJAJ	5	12	142	1	4	12
AJAJ	6	13	148	1	4	13
AJAK	0	5	151	1	5	5
AJAK	1	6	125	1	5	6
AJAK	2	7	141	1	5	7
AJAK	3	8	125	1	5	8
AJAK	4	9	102	1	5	9
ALAJ	0	5	156	0	5	5
ALAK	0	3	160	1	3	3
ALAK	1	4	144	1	3	4
ALAK	2	5	109	1	3	5
ALAK	3	6	107	1	3	6
ALAK	4	7	85	1	3	7
ALAK	5	8	98	1	3	8
ALAK	6	10	102	1	3	10
ALAK	7	11	168	1	3	11
ALAK	8	12	156	1	3	12
ALAK	9	13	113	1	3	13
ALAP	0	5	123	1	5	5
ALAP	1	6	114	1	5	6
ALAP	2	7	139	1	5	7
AMAD	0	5	156	1	5	5
AMAD	1	6	114	1	5	6
AMAD	2	7	141	1	5	7
AMAD	3	8	105	1	5	8
AMAD	4	9	123	1	5	9
AMAK	0	4	144	1	4	4
AMAK	1	5	116	1	4	5
AMAK	2	6	127	1	4	6
AMAK	3	7	139	1	4	7
AMAK	4	8	126	1	4	8
AMAK	5	9	132	1	4	9
AMAK	6	10	102	1	4	10
AMAL	0	4	137	1	4	4
AMAL	1	5	130	1	4	5
AMAL	2	6	149	1	4	6
AMAL	3	7	127	1	4	7
AMAL	4	8	126	1	4	8
AMAL	5	9	111	1	4	9
AMAL	6	10	129	1	4	10
AMAL	7	11	114	1	4	11
AMAL	7	12	114	1	4	12
AMAL	8	13	104	1	4	13
AMAX	0	4	135	1	4	4
AMAX	1	5	116	1	4	5
AMAX	2	6	100	1	4	6
AMAX	3	7	132	1	4	7
AMAX	4	8	103	1	4	8
AMAX	5	9	116	1	4	9
AMAX	6	10	102	1	4	10
AMAX	7	11	86	1	4	11
ANAB	0	5	109	1	5	5
ANAB	1	6	111	1	5	6
ANAB	2	7	99	1	5	7
ANAB	3	9	104	1	5	9
ANAB	4	10	151	1	5	10
ANAB	5	11	127	1	5	11
ANAD	1	7	118	0	5	7
ANAD	2	8	161	0	5	8
ANAN	0	4	134	1	4	4
ANAN	1	5	116	1	4	5
ANAN	2	6	121	1	4	6
ANAN	3	7	120	1	4	7
ANAN	4	8	98	1	4	8
ANAN	5	9	71	1	4	9
ANAN	6	10	102	1	4	10
ANAN	7	11	94	1	4	11
ANAN	8	12	149	1	4	12
ANAN	9	13	113	1	4	13
ANAS	0	4	141	1	4	4
ANAS	1	5	102	1	4	5
ANAS	2	6	65	1	4	6
ANAS	3	7	78	1	4	7
ANAS	4	8	77	1	4	8
ANAW	0	4	135	1	4	4
ANAW	1	5	130	1	4	5
APAH	0	3	139	1	3	3
APAH	1	4	134	1	3	4
APAU	0	4	141	1	4	4
APAU	1	5	137	1	4	5
APAU	2	6	118	1	4	6
ARAH	0	5	144	1	5	5
ARAH	1	6	156	1	5	6
ARAH	2	7	159	1	5	7
ARAH	3	8	140	1	5	8
ARAH	4	9	136	1	5	9
ASAH	0	4	135	1	4	4
ASAH	1	5	130	1	4	5
ASAH	2	6	128	1	4	6
ASAH	3	7	120	1	4	7
ASAH	4	8	147	1	4	8
ASAH	5	9	146	1	4	9
ASAH	6	10	129	1	4	10
ASAH	7	11	115	1	4	11
ASAH	7	12	135	1	4	12
ASAH	8	13	134	1	4	13
ASAP	0	3	149	1	3	3
ASAP	1	4	135	1	3	4
ASAP	2	5	130	1	3	5
ASAP	3	6	114	1	3	6
ASAP	4	7	120	1	3	7
ASAP	5	8	117	1	3	8
ASAP	6	9	122	1	3	9
ASAP	7	10	123	1	3	10
ASAP	8	11	115	1	3	11
ASAP	9	12	128	1	3	12
ASAP	10	13	120	1	3	13
ASAX	0	3	146	1	3	3
ASAX	1	4	137	1	3	4
ASAX	1	5	137	1	3	5
ASAX	2	6	135	1	3	6
ASAX	3	7	139	1	3	7
ASAX	4	8	131	1	3	8
ASAX	5	9	125	1	3	9
ASAX	6	10	109	1	3	10
ASAX	7	11	114	1	3	11
ASAX	8	12	146	1	3	12
ASAX	9	13	134	1	3	13
ASAY	0	5	137	1	5	5
ASAY	1	6	121	1	5	6
ASAY	2	7	120	1	5	7
ASAY	3	8	131	1	5	8
ASAY	4	9	125	1	5	9
ASAY	5	10	135	1	5	10
ASAY	6	11	114	1	5	11
ASAY	7	12	126	1	5	12
AUAA	0	4	141	1	4	4
AUAA	1	5	137	1	4	5
AUAA	2	6	127	1	4	6
AUAA	3	7	127	1	4	7
AUAP	0	4	141	1	4	4
AUAP	1	5	130	1	4	5
AUAP	2	6	135	1	4	6
AUAP	3	7	120	1	4	7
AUAP	4	8	145	1	4	8
AUAP	5	9	125	1	4	9
AUAP	6	10	129	1	4	10
AUAP	7	11	108	1	4	11
AUAP	7	12	112	1	4	12
AUAP	8	13	132	1	4	13
AUAV	0	5	102	1	5	5
AUAV	1	6	107	1	5	6
AUAV	2	7	120	1	5	7
AUAV	3	8	105	1	5	8
AUAV	4	9	97	1	5	9
AUAV	5	10	100	1	5	10
AUAV	6	11	94	1	5	11
AWAF	0	4	145	1	4	4
AWAF	1	5	137	1	4	5
AWAF	2	6	133	1	4	6
AWAF	3	7	132	1	4	7
AWAF	4	8	126	1	4	8
AWAN	0	5	130	1	5	5
AWAN	1	6	127	1	5	6
AWAN	2	7	125	1	5	7
AWAN	3	8	117	1	5	8
AWAR	0	3	139	1	3	3
AWAR	1	4	137	1	3	4
AWAR	2	7	182	1	3	7
AWAR	3	8	96	1	3	8
AWAR	4	9	83	1	3	9
AWAR	5	10	113	1	3	10
AWAR	6	11	94	1	3	11
AWAR	7	12	112	1	3	12
AWAR	8	13	120	1	3	13
AWAU	0	4	153	1	4	4
AWAU	1	5	137	1	4	5
AWAU	2	6	134	1	4	6
AWAU	3	7	173	1	4	7
AXAG	0	3	139	0	3	3
AXAG	1	4	135	0	3	4
AXAG	2	5	116	0	3	5
AXAG	3	6	107	0	3	6
AXAG	4	7	118	0	3	7
BAAG	0	3	146	1	3	3
BAAG	1	4	137	1	3	4
BAAG	2	5	130	1	3	5
BAAG	3	6	121	1	3	6
BAAK	0	4	137	1	4	4
BAAK	1	5	102	1	4	5
BAAK	2	6	107	1	4	6
BAAK	3	7	15	1	4	7
BAAK	4	8	84	1	4	8
BAAK	5	9	97	1	4	9
BAAK	6	10	102	1	4	10
BAAK	7	11	94	1	4	11
BBAB	0	3	125	0	3	3
BBAB	1	4	141	0	3	4
BBAB	1	5	116	0	3	5
BBAB	2	6	100	0	3	6
BBAB	3	7	97	0	3	7
BBAB	4	8	96	0	3	8
BBAB	5	9	116	0	3	9
BBAF	0	4	153	0	4	4
BBAF	1	5	137	0	4	5
BBAF	2	6	128	0	4	6
BBAF	3	7	168	0	4	7
BBAF	4	8	140	0	4	8
BBAF	5	9	129	0	4	9
BBAF	6	10	121	0	4	10
BBAF	7	11	166	0	4	11
BBAF	8	12	133	0	4	12
BBAF	9	13	132	0	4	13
BBAT	0	5	116	1	5	5
BBAT	1	6	121	1	5	6
BBAT	2	7	99	1	5	7
BBAT	3	8	145	1	5	8
BBAT	4	9	104	1	5	9
BBAX	1	5	123	0	4	5
BBAX	2	6	111	0	4	6
BBAX	3	7	141	0	4	7
BBAX	4	8	112	0	4	8
BBAX	5	9	102	0	4	9
BBAX	6	10	116	0	4	10
BBAX	7	11	86	0	4	11
BBAX	8	12	114	0	4	12
BBAY	0	5	142	1	5	5
BBAY	1	6	128	1	5	6
BCAR	0	3	153	1	3	3
BDAN	0	5	123	1	5	5
BDAN	1	6	121	1	5	6
BDAN	2	7	139	1	5	7
BDAN	3	8	145	1	5	8
BDAN	4	9	104	1	5	9
BDAN	5	10	106	1	5	10
BDAN	6	11	92	1	5	11
BDAN	6	12	126	1	5	12
BDAP	0	4	135	1	4	4
BDAP	1	5	123	1	4	5
BDAP	2	6	107	1	4	6
BDAP	3	7	132	1	4	7
BDAU	0	5	123	1	5	5
BDAU	1	6	118	1	5	6
BJAA	0	4	144	1	4	4
BJAA	1	5	130	1	4	5
BJAA	2	6	128	1	4	6
BJAA	3	7	120	1	4	7
BJAA	4	8	147	1	4	8
BJAA	5	9	167	1	4	9
BJAA	6	10	113	1	4	10
BJAA	7	11	114	1	4	11
BJAA	8	12	126	1	4	12
BJAA	9	13	132	1	4	13
BJAZ	0	5	130	1	5	5
BJAZ	1	6	121	1	5	6
BJAZ	2	7	120	1	5	7
BJAZ	3	8	145	1	5	8
BJAZ	4	9	137	1	5	9
BKAA	0	3	149	1	3	3
BKAA	1	4	137	1	3	4
BKAN	0	4	137	1	4	4
BKAN	1	5	123	1	4	5
BKAX	0	3	151	1	3	3
BKAX	1	4	141	1	3	4
BKAX	2	5	127	1	3	5
BKAX	3	6	114	1	3	6
BLAD	0	4	137	1	4	4
BLAD	1	5	116	1	4	5
BLAD	2	6	135	1	4	6
BLAD	3	7	120	1	4	7
BLAD	4	8	125	1	4	8
BLAD	5	9	109	1	4	9
BLAD	6	10	109	1	4	10
BLAD	7	11	114	1	4	11
BLAD	7	12	128	1	4	12
BLAD	8	13	120	1	4	13
BLAH	0	4	141	1	4	4
BLAH	1	5	156	1	4	5
BLAH	2	6	121	1	4	6
BLAH	3	7	120	1	4	7
BLAH	4	8	126	1	4	8
BLAH	5	9	111	1	4	9
BLAH	6	10	116	1	4	10
BLAN	0	6	156	1	6	6
BLAR	0	4	143	1	4	4
BLAR	1	5	149	1	4	5
BLAR	2	6	134	1	4	6
BLAR	3	7	139	1	4	7
BLAR	4	8	138	1	4	8
BLAR	5	9	125	1	4	9
BLAR	6	10	135	1	4	10
BLAR	7	11	122	1	4	11
BLAR	8	12	125	1	4	12
BLAR	9	13	120	1	4	13
BMAA	0	3	125	0	3	3
BMAA	1	4	135	0	3	4
BMAA	2	5	130	0	3	5
BMAN	0	5	137	1	5	5
BMAN	1	6	121	1	5	6
BMAN	2	7	132	1	5	7
BMAN	3	8	138	1	5	8
BMAN	4	9	123	1	5	9
BMAN	5	10	116	1	5	10
BMAN	6	11	120	1	5	11
BMAN	7	12	128	1	5	12
BMAN	8	13	127	1	5	13
BMAT	0	4	144	1	4	4
BMAT	1	5	149	1	4	5
BMAT	1	6	125	1	4	6
BMAT	2	7	125	1	4	7
BMAT	3	8	105	1	4	8
BNAC	0	3	146	1	3	3
BNAC	1	4	141	1	3	4
BNAC	2	5	116	1	3	5
BNAC	3	6	111	1	3	6
BNAC	4	7	104	1	3	7
BNAC	5	8	98	1	3	8
BNAH	0	4	144	1	4	4
BNAH	1	5	130	1	4	5
BNAH	2	6	121	1	4	6
BNAH	3	7	160	1	4	7
BNAH	4	8	167	1	4	8
BNAH	5	9	153	1	4	9
BNAH	6	10	163	1	4	10
BNAH	7	12	182	1	4	12
BNAH	8	13	182	1	4	13
BNAR	0	4	137	1	4	4
BNAR	1	5	123	1	4	5
BNAR	2	6	121	1	4	6
BNAR	3	7	155	1	4	7
BNAR	4	8	131	1	4	8
BNAR	5	9	136	1	4	9
BNAT	0	3	146	1	3	3
BNAT	1	4	137	1	3	4
BNAT	2	5	130	1	3	5
BPAL	0	4	137	1	4	4
BPAL	1	5	149	1	4	5
BPAL	2	6	134	1	4	6
BPAZ	0	3	144	0	3	3
BPAZ	1	4	141	0	3	4
BPAZ	1	5	142	0	3	5
BSAL	0	5	144	1	5	5
BSAL	1	6	114	1	5	6
BSAL	2	7	106	1	5	7
BSAL	3	8	98	1	5	8
BSAL	4	9	132	1	5	9
BSAL	5	10	113	1	5	10
BSAL	6	11	66	1	5	11
BSAL	7	12	105	1	5	12
BSAL	8	13	127	1	5	13
BSAT	0	4	135	1	4	4
BSAT	1	5	130	1	4	5
BSAT	2	6	125	1	4	6
BSAT	3	7	120	1	4	7
BSAT	4	8	126	1	4	8
BSAT	5	9	118	1	4	9
BSAT	6	10	186	1	4	10
BSAT	7	11	127	1	4	11
BSAW	0	4	137	1	4	4
BSAW	1	5	191	1	4	5
BSAW	2	6	114	1	4	6
BSAW	3	7	131	1	4	7
BSAW	4	8	98	1	4	8
BSAY	0	4	137	1	4	4
BSAY	1	5	116	1	4	5
BSAY	2	6	107	1	4	6
BSAY	3	7	120	1	4	7
BSAY	4	8	105	1	4	8
BSAY	5	9	102	1	4	9
BSAY	6	10	113	1	4	10
BSAY	7	11	115	1	4	11
BSAY	8	12	142	1	4	12
BSAY	9	13	141	1	4	13
BTAF	0	4	134	1	4	4
BTAF	1	5	142	1	4	5
BTAF	2	6	125	1	4	6
BTAF	2	7	131	1	4	7
BTAF	3	8	125	1	4	8
BTAF	4	9	125	1	4	9
BTAF	5	10	123	1	4	10
BTAF	6	11	122	1	4	11
BTAF	7	12	121	1	4	12
BTAF	8	13	120	1	4	13
BTAG	1	6	142	1	5	6
BTAG	2	7	120	1	5	7
BTAG	3	8	126	1	5	8
BTAG	3	11	127	1	5	11
BTAG	3	12	156	1	5	12
BTAG	4	13	155	1	5	13
BTAX	0	4	137	1	4	4
BTAX	1	5	137	1	4	5
BTAX	2	6	121	1	4	6
BTAX	3	7	120	1	4	7
BTAX	4	8	133	1	4	8
BTAX	5	9	118	1	4	9
BTAX	6	10	113	1	4	10
BTAX	7	11	108	1	4	11
BTAX	8	12	128	1	4	12
BTAX	9	13	113	1	4	13
DFAF	0	11	126	1	4	4
DFAF	1	12	126	1	4	5
DFAF	2	13	125	1	4	6
DFAP	0	11	149	0	4	4
DFAP	1	12	155	0	4	5
DFAP	2	13	195	0	4	6
DLAV	0	11	157	1	4	4
DMAC	0	12	119	1	5	5
DMAJ	0	12	126	1	5	5
DMAU	0	12	128	1	5	5
DMAU	1	13	134	1	5	6
DMAW	0	10	156	0	3	3
DMAW	1	11	157	0	3	4
DMAW	2	12	135	0	3	5
DMAW	3	13	155	0	3	6
DNAU	0	12	114	1	5	5
DNAU	1	13	113	1	5	6
DPAD	0	12	126	0	5	5
DPAD	1	13	111	0	5	6
DPAK	0	12	156	1	5	5
DPAK	1	13	194	1	5	6
DPAM	0	10	143	1	3	3
DPAM	1	11	115	1	3	4
DPAZ	0	11	120	1	4	4
DPAZ	1	12	128	1	4	5
DPAZ	2	13	120	1	4	6
DRAR	0	11	160	0	4	4
DRAR	1	12	147	0	4	5
DRAR	2	13	153	0	4	6
DRAZ	0	10	200	0	3	3
DRAZ	1	11	141	0	3	4
DRAZ	1	12	135	0	3	5
DSAJ	0	10	121	1	3	3
DSAJ	1	11	106	1	3	4
DSAJ	1	12	112	1	3	5
DSAJ	2	13	83	1	3	6
DTAG	1	11	129	0	3	4
DTAG	1	12	126	0	3	5
DTAG	2	13	151	0	3	6
DUAB	0	11	66	1	4	4
DUAB	1	12	105	1	4	5
DUAB	2	13	104	1	4	6
DUAD	0	11	183	1	4	4
DUAD	1	12	147	1	4	5
DUAY	0	11	133	0	4	4
DUAY	1	12	119	0	4	5
DUAY	2	13	132	0	4	6
DVAJ	0	10	143	1	3	3
DVAJ	1	11	182	1	3	4
DVAJ	2	12	128	1	3	5
DVAJ	3	13	152	1	3	6
DVAL	0	13	160	0	6	6
DVAP	0	12	121	1	5	5
DVAP	1	13	104	1	5	6
DVAU	0	11	115	1	4	4
DVAU	1	12	128	1	4	5
DVAU	2	13	104	1	4	6
DVAY	0	12	156	1	5	5
DVAY	1	13	127	1	5	6
DWAJ	0	11	115	1	4	4
DWAJ	1	12	142	1	4	5
DWAJ	2	13	141	1	4	6
DWAR	0	12	121	1	5	5
DWAS	0	12	135	0	5	5
DWAS	1	13	134	0	5	6
DWAY	0	12	147	1	5	5
DWAY	1	13	151	1	5	6
DXAS	0	10	137	0	3	3
DXAS	1	11	183	0	3	4
DXAT	0	12	135	0	5	5
DXAT	1	13	148	0	5	6
DXAU	0	10	143	1	3	3
DXAU	1	11	120	1	3	4
DXAU	2	12	142	1	3	5
DXAU	3	13	134	1	3	6
DXAX	0	10	149	0	3	3
DXAX	1	11	129	0	3	4
DXAX	1	12	140	0	3	5
DXAX	2	13	125	0	3	6
DYAC	0	11	121	0	4	4
DYAC	1	12	133	0	4	5
DYAC	2	13	125	0	4	6
DYAG	0	11	183	1	4	4
DYAG	1	12	126	1	4	5
DYAG	2	13	104	1	4	6
DYAR	0	11	153	0	4	4
DYAR	1	12	126	0	4	5
DYAR	2	13	146	0	4	6
DZAK	0	12	112	0	5	5
DZAM	0	12	162	1	5	5
DZAM	1	13	134	1	5	6
DZAX	0	11	129	1	4	4
DZAX	1	12	128	1	4	5
DZAX	2	13	113	1	4	6
E089	1	6	142	0	4	6
E089	2	7	141	0	4	7
E089	3	8	138	0	4	8
E089	4	9	118	0	4	9
E089	5	10	123	0	4	10
E089	7	12	135	0	4	12
E089	8	13	127	0	4	13
E373	0	7	148	1	6	6
E373	1	8	182	1	6	7
E373	2	9	125	1	6	8
E373	3	10	129	1	6	9
E523	0	9	167	0	7	7
E523	1	10	143	0	7	8
E523	2	11	127	0	7	9
E523	2	12	140	0	7	10
E523	3	13	125	0	7	11
E720	0	6	127	1	4	4
E720	1	7	139	1	4	5
E720	2	8	131	1	4	6
E720	3	9	132	1	4	7
E720	4	10	123	1	4	8
E720	5	11	122	1	4	9
E720	6	12	121	1	4	10
E720	7	13	113	1	4	11
EA91	0	3	193	0	6	6
EA91	1	4	143	0	6	7
EA91	1	5	116	0	6	8
EA91	2	6	114	0	6	9
EA91	3	7	104	0	6	10
EA91	4	8	152	0	6	11
EA91	5	9	116	0	6	12
EA91	6	10	106	0	6	13
EL52	0	1	114	0	4	4
EL52	1	2	147	0	4	5
EL52	2	3	111	0	4	6
EL52	3	4	141	0	4	7
EL52	3	5	102	0	4	8
EL52	4	6	133	0	4	9
EL52	5	7	92	0	4	10
EL52	6	8	103	0	4	11
EL52	7	9	123	0	4	12
EL52	8	10	92	0	4	13
ES51	0	2	126	1	5	5
ES51	1	3	69	1	5	6
ES51	2	4	54	1	5	7
ES51	2	5	102	1	5	8
ES51	3	6	134	1	5	9
ES51	3	7	141	1	5	10
ES51	3	8	63	1	5	11
ES51	3	10	81	1	5	13
ET54	0	2	119	0	5	5
ET54	1	3	144	0	5	6
ET54	2	6	147	0	5	9
ET54	4	8	168	0	5	11
ET54	5	9	185	0	5	12
ET54	6	10	116	0	5	13
EU83	2	7	127	0	7	9
EU83	3	8	147	0	7	10
EU83	4	9	116	0	7	11
EU83	5	10	135	0	7	12
EU83	6	11	107	0	7	13
GDAP	0	12	170	0	4	4
GDAP	1	13	134	0	4	5
GDAX	0	12	135	1	4	4
GDAX	1	13	113	1	4	5
GGAC	0	12	126	0	4	4
GGAC	1	13	146	0	4	5
GGAV	0	12	126	1	4	4
GGAV	1	13	132	1	4	5
GJAT	0	10	158	0	3	3
GJAT	1	12	140	0	3	5
GJAT	2	13	132	0	3	6
GKAB	0	12	156	1	5	5
GKAB	1	13	120	1	5	6
GKAV	0	12	121	0	5	5
GKAV	1	13	146	0	5	6
GLAC	0	11	183	1	4	4
GLAC	1	12	149	1	4	5
GLAC	2	13	120	1	4	6
GNAG	0	12	133	1	4	4
GNAG	1	13	125	1	4	5
GNAR	0	12	128	1	4	4
GNAR	1	13	120	1	4	5
GNAU	0	12	156	0	4	4
GNAU	1	13	141	0	4	5
GPAD	0	12	161	1	4	4
GPAD	1	13	146	1	4	5
GPAR	0	12	126	1	4	4
GPAR	1	13	132	1	4	5
GRAC	0	12	140	0	4	4
GRAS	0	12	154	0	4	4
GRAS	1	13	118	0	4	5
GSAN	0	12	121	0	4	4
GSAN	1	13	118	0	4	5
GSAW	0	12	140	1	4	4
GSAW	1	13	132	1	4	5
GSAY	0	12	160	1	4	4
GSAY	1	13	146	1	4	5
GTAJ	0	12	133	0	4	4
GTAJ	1	13	148	0	4	5
GTAK	0	12	126	1	4	4
GTAK	1	13	146	1	4	5
HAAJ	0	12	133	0	3	3
HAAJ	1	13	160	0	3	4
HAAP	0	13	146	1	4	4
HCAP	0	13	183	1	4	4
HCAR	0	13	148	1	4	4
HCAT	0	13	148	1	4	4
HCAU	0	13	159	1	4	4
HDAG	0	13	139	0	4	4
HFAA	0	13	146	1	4	4
HFAR	0	13	146	1	4	4
HGAU	0	13	146	1	4	4
HHAD	0	12	133	0	3	3
HJAB	0	13	155	0	4	4
HJAM	0	12	140	0	3	3
HJAM	1	13	139	0	3	4
HKAH	0	13	152	1	4	4
HKAP	0	13	139	1	4	4
HKAT	0	13	151	1	4	4
HKAX	0	13	132	1	4	4
HLAP	0	13	187	1	4	4
HLAU	0	13	146	0	4	4
HMAL	0	13	196	0	4	4
HMAT	0	12	153	0	3	3
HNAF	0	12	154	0	3	3
HNAF	1	13	132	0	3	4
HNAG	0	13	134	1	4	4
HNAT	0	12	177	0	3	3
HNAT	1	13	148	0	3	4
HPAJ	0	12	128	0	3	3
HPAJ	1	13	120	0	3	4
HRAA	0	12	149	0	3	3
HRAA	1	13	141	0	3	4
HSAJ	0	13	134	0	4	4
HSAL	0	13	141	1	4	4
HSAN	0	12	140	0	3	3
HSAN	1	13	125	0	3	4
HSAZ	0	13	155	1	4	4
HTAS	0	13	132	1	4	4
HUAF	0	13	134	1	4	4
HYAR	0	13	120	1	4	4
HZAB	0	12	146	0	3	3
HZAB	1	13	111	0	3	4
HZAD	0	13	120	1	4	4
HZAK	0	13	104	0	4	4
HZAS	0	13	148	1	4	4
HZAV	0	13	166	1	4	4
KJAJ	0	13	148	0	4	4
KJAZ	0	13	120	1	4	4
LPAJ	0	13	141	1	3	3
LPAV	0	13	148	1	3	3
LRAC	0	13	139	0	3	3
LSAS	0	13	134	1	3	3
PE5	0	3	167	0	5	5
PE5	1	6	134	0	5	8
PE5	2	7	111	0	5	9
PE5	3	8	152	0	5	10
PE5	4	9	129	0	5	11
PE5	5	10	100	0	5	12
PE5	6	11	121	0	5	13
PH0	2	5	183	0	4	7
PH0	3	6	140	0	4	8
PH0	4	7	141	0	4	9
RT0	1	6	154	0	7	8
RT0	2	7	120	0	7	9
RT0	3	8	147	0	7	10
RT0	4	9	130	0	7	11
RT0	5	10	121	0	7	12
THV	0	8	158	0	4	4
THV	1	11	108	0	4	7
THV	2	12	156	0	4	8
THV	3	13	113	0	4	9
TU9	1	6	154	1	6	7
TU9	2	7	141	1	6	8
TU9	3	8	103	1	6	9
TU9	4	9	116	1	6	10
TU9	5	10	100	1	6	11
TU9	6	11	101	1	6	12
TU9	7	12	133	1	6	13

## Sheet: table 3 right panel
identity	Exp	arrival date	maturation	year	α	ageclass
AAAX	0	146	first	4	3	3
AAAX	0	215	pros	3	3	2
AAAX	1	144	exp	5	3	4
AAAZ	0	132	first	4	3	3
AAAZ	0	176	pros	2	3	1
AAAZ	1	96	exp	5	3	4
AAAZ	2	109	exp	6	3	5
AAAZ	3	107	exp	7	3	6
AAAZ	4	120	exp	8	3	7
AAAZ	5	147	exp	9	3	8
AAAZ	6	104	exp	10	3	9
ABAD	0	161	pros	4	4	3
ABAD	1	144	exp	6	4	5
ABAD	2	127	exp	7	4	6
ABAD	3	120	exp	8	4	7
ABAJ	0	134	first	5	4	4
ABAJ	0	140	pros	3	4	2
ABAJ	0	151	pros	4	4	3
ABAJ	1	116	exp	6	4	5
ABAJ	2	79	exp	7	4	6
ABAJ	3	132	exp	8	4	7
ABAJ	4	126	exp	9	4	8
ABAJ	5	90	exp	10	4	9
ABAJ	6	200	exp	11	4	10
ABAJ	7	93	exp	12	4	11
ABAJ	7	182	exp	13	4	12
ABAR	0	137	first	5	4	4
ABAR	0	146	pros	4	4	3
ABAR	0	166	pros	3	4	2
ABAR	1	116	exp	6	4	5
ABAR	2	134	exp	7	4	6
ABAR	3	120	exp	8	4	7
ABAR	4	125	exp	9	4	8
ABAR	5	122	exp	10	4	9
ABAR	6	109	exp	11	4	10
ABAR	7	113	exp	12	4	11
ABAZ	0	141	pros	5	6	4
ABAZ	0	146	pros	4	6	3
ABAZ	0	201	pros	3	6	2
ABAZ	1	118	exp	8	6	7
ABAZ	1	147	exp	9	6	8
ACAJ	0	159	first	5	4	4
ACAJ	0	165	pros	4	4	3
ACAJ	0	166	pros	3	4	2
ACAJ	1	123	exp	6	4	5
ACAJ	2	114	exp	7	4	6
ACAJ	3	120	exp	8	4	7
ACAJ	4	98	exp	9	4	8
ACAL	0	104	first	4	3	3
ACAL	0	199	pros	3	3	2
ACAL	1	96	exp	5	3	4
ACAL	2	109	exp	6	3	5
ADAF	0	156	pros	4	4	3
ADAF	0	157	first	5	4	4
ADAF	0	166	pros	3	4	2
ADAF	1	137	exp	6	4	5
ADAF	2	127	exp	7	4	6
ADAF	3	120	exp	8	4	7
ADAF	4	125	exp	9	4	8
ADAF	5	118	exp	10	4	9
ADAF	6	114	exp	11	4	10
ADAF	7	114	exp	13	4	12
ADAF	8	141	exp	14	4	13
ADAV	0	116	first	6	5	5
ADAV	0	135	pros	5	5	4
ADAV	0	180	pros	3	5	2
ADAW	0	139	pros	4	4	3
ADAW	0	180	first	5	4	4
ADAW	0	199	pros	3	4	2
ADAW	1	130	exp	6	4	5
AFAF	0	144	first	5	4	4
AFAF	0	161	pros	4	4	3
AFAF	1	137	exp	6	4	5
AFAF	2	133	exp	7	4	6
AFAF	3	141	exp	8	4	7
AFAN	0	111	pros	4	4	3
AFAN	0	126	pros	3	4	2
AFAN	0	135	first	5	4	4
AFAN	1	123	exp	6	4	5
AFAN	2	114	exp	7	4	6
AFAN	3	78	exp	8	4	7
AFAN	4	96	exp	9	4	8
AFAP	0	144	first	5	4	4
AFAP	0	153	pros	4	4	3
AFAP	0	203	pros	3	4	2
AFAP	1	109	exp	6	4	5
AFAP	2	111	exp	7	4	6
AFAP	3	120	exp	8	4	7
AFAP	4	117	exp	9	4	8
AFAP	6	186	exp	11	4	10
AFAP	7	149	exp	13	4	12
AFAP	8	194	exp	14	4	13
AFAR	0	207	first	6	5	5
AFAR	1	142	exp	7	5	6
AFAR	2	141	exp	8	5	7
AFAR	3	138	exp	9	5	8
AFAR	4	146	exp	10	5	9
AFAR	5	143	exp	11	5	10
AFAR	6	142	exp	13	5	12
AFAR	7	155	exp	14	5	13
AFAS	0	82	first	5	4	4
AFAS	0	118	pros	4	4	3
AFAS	0	206	pros	3	4	2
AFAS	1	109	exp	6	4	5
AFAS	2	118	exp	7	4	6
AFAS	3	141	exp	8	4	7
AFAS	4	117	exp	9	4	8
AFAS	5	111	exp	10	4	9
AFAS	6	99	exp	11	4	10
AFAS	7	120	exp	12	4	11
AFAS	8	135	exp	13	4	12
AFAS	9	148	exp	14	4	13
AFAW	0	135	first	5	4	4
AFAW	0	153	pros	4	4	3
AFAW	0	201	pros	3	4	2
AFAW	1	116	exp	6	4	5
AFAW	2	107	exp	7	4	6
AFAW	3	106	exp	8	4	7
AFAW	4	147	exp	9	4	8
AGAB	0	19	first	5	4	4
AGAB	0	161	pros	4	4	3
AGAB	1	102	exp	6	4	5
AGAB	2	79	exp	7	4	6
AGAG	0	137	first	5	4	4
AGAG	0	207	pros	4	4	3
AGAG	1	130	exp	6	4	5
AGAG	2	134	exp	7	4	6
AGAG	3	120	exp	8	4	7
AGAG	4	147	exp	9	4	8
AGAG	5	159	exp	10	4	9
AGAG	6	116	exp	11	4	10
AGAG	7	114	exp	12	4	11
AGAG	8	133	exp	13	4	12
AGAG	9	118	exp	14	4	13
AGAH	0	132	pros	4	4	3
AGAH	0	141	first	5	4	4
AGAH	0	180	pros	3	4	2
AGAH	1	144	exp	6	4	5
AHAH	0	111	pros	4	5	3
AHAH	0	116	first	6	5	5
AHAH	0	137	pros	5	5	4
AHAJ	0	139	first	4	3	3
AHAJ	0	164	pros	3	3	2
AHAJ	1	141	exp	5	3	4
AHAJ	1	142	exp	6	3	5
AHAJ	2	140	exp	7	3	6
AHAL	0	144	first	5	4	4
AHAL	0	158	pros	4	4	3
AHAL	0	166	pros	3	4	2
AHAL	1	130	exp	6	4	5
AHAL	2	128	exp	7	4	6
AHAL	3	155	exp	8	4	7
AHAS	0	145	pros	3	4	2
AHAS	0	149	pros	4	4	3
AHAS	0	159	first	5	4	4
AHAS	1	137	exp	6	4	5
AHAS	2	149	exp	7	4	6
AHAS	3	132	exp	8	4	7
AHAS	4	152	exp	9	4	8
AHAS	5	125	exp	10	4	9
AHAS	6	116	exp	11	4	10
AHAS	7	114	exp	13	4	12
AHAW	0	131	first	5	4	4
AHAW	0	151	pros	4	4	3
AHAW	0	194	pros	3	4	2
AHAW	1	130	exp	6	4	5
AHAW	2	118	exp	7	4	6
AHAW	3	159	exp	8	4	7
AHAW	4	147	exp	9	4	8
AHAZ	0	157	first	5	4	4
AHAZ	0	160	pros	4	4	3
AHAZ	0	201	pros	3	4	2
AHAZ	1	149	exp	6	4	5
AHAZ	2	142	exp	7	4	6
AHAZ	3	153	exp	8	4	7
AJAA	0	137	first	6	5	5
AJAA	0	165	pros	4	5	3
AJAA	0	180	pros	3	5	2
AJAA	1	135	exp	7	5	6
AJAA	2	132	exp	8	5	7
AJAA	3	167	exp	9	5	8
AJAA	4	132	exp	10	5	9
AJAA	5	129	exp	11	5	10
AJAA	6	197	exp	12	5	11
AJAA	7	149	exp	13	5	12
AJAA	8	141	exp	14	5	13
AJAD	0	123	first	6	5	5
AJAD	0	137	pros	5	5	4
AJAD	0	144	pros	4	5	3
AJAD	1	111	exp	7	5	6
AJAD	2	120	exp	8	5	7
AJAD	3	105	exp	9	5	8
AJAD	4	118	exp	10	5	9
AJAH	0	149	pros	4	4	3
AJAH	1	116	exp	6	4	5
AJAH	2	127	exp	7	4	6
AJAH	3	120	exp	8	4	7
AJAJ	0	144	first	5	4	4
AJAJ	0	146	pros	4	4	3
AJAJ	0	194	pros	3	4	2
AJAJ	1	130	exp	6	4	5
AJAJ	2	201	exp	9	4	8
AJAJ	3	125	exp	10	4	9
AJAJ	4	116	exp	11	4	10
AJAJ	5	115	exp	12	4	11
AJAJ	5	142	exp	13	4	12
AJAJ	6	148	exp	14	4	13
AJAK	0	137	pros	5	5	4
AJAK	0	139	pros	4	5	3
AJAK	0	147	pros	3	5	2
AJAK	0	151	first	6	5	5
AJAK	1	125	exp	7	5	6
AJAK	2	141	exp	8	5	7
AJAK	3	125	exp	9	5	8
AJAK	4	102	exp	10	5	9
ALAJ	0	156	first	6	5	5
ALAK	0	160	first	4	3	3
ALAK	0	201	pros	3	3	2
ALAK	1	144	exp	5	3	4
ALAK	2	109	exp	6	3	5
ALAK	3	107	exp	7	3	6
ALAK	4	85	exp	8	3	7
ALAK	5	98	exp	9	3	8
ALAK	6	102	exp	11	3	10
ALAK	7	168	exp	12	3	11
ALAK	8	156	exp	13	3	12
ALAK	9	113	exp	14	3	13
ALAP	0	123	first	6	5	5
ALAP	0	137	pros	5	5	4
ALAP	0	168	pros	3	5	2
ALAP	0	172	pros	4	5	3
ALAP	1	114	exp	7	5	6
ALAP	2	139	exp	8	5	7
AMAD	0	143	pros	5	5	4
AMAD	0	156	first	6	5	5
AMAD	0	181	pros	4	5	3
AMAD	1	114	exp	7	5	6
AMAD	2	141	exp	8	5	7
AMAD	3	105	exp	9	5	8
AMAD	4	123	exp	10	5	9
AMAK	0	119	pros	3	4	2
AMAK	0	144	first	5	4	4
AMAK	0	151	pros	4	4	3
AMAK	1	116	exp	6	4	5
AMAK	2	127	exp	7	4	6
AMAK	3	139	exp	8	4	7
AMAK	4	126	exp	9	4	8
AMAK	5	132	exp	10	4	9
AMAK	6	102	exp	11	4	10
AMAL	0	137	first	5	4	4
AMAL	0	151	pros	4	4	3
AMAL	0	173	pros	3	4	2
AMAL	1	130	exp	6	4	5
AMAL	2	149	exp	7	4	6
AMAL	3	127	exp	8	4	7
AMAL	4	126	exp	9	4	8
AMAL	5	111	exp	10	4	9
AMAL	6	129	exp	11	4	10
AMAL	7	114	exp	12	4	11
AMAL	7	114	exp	13	4	12
AMAL	8	104	exp	14	4	13
AMAX	0	14	pros	3	4	2
AMAX	0	104	pros	4	4	3
AMAX	0	135	first	5	4	4
AMAX	1	116	exp	6	4	5
AMAX	2	100	exp	7	4	6
AMAX	3	132	exp	8	4	7
AMAX	4	103	exp	9	4	8
AMAX	5	116	exp	10	4	9
AMAX	6	102	exp	11	4	10
AMAX	7	86	exp	12	4	11
ANAB	0	109	first	6	5	5
ANAB	0	132	pros	4	5	3
ANAB	0	141	pros	5	5	4
ANAB	0	182	pros	3	5	2
ANAB	1	111	exp	7	5	6
ANAB	2	99	exp	8	5	7
ANAB	3	104	exp	10	5	9
ANAB	4	151	exp	11	5	10
ANAB	5	127	exp	12	5	11
ANAD	1	118	exp	8	5	7
ANAD	2	161	exp	9	5	8
ANAN	0	134	first	5	4	4
ANAN	0	153	pros	4	4	3
ANAN	0	215	pros	3	4	2
ANAN	1	116	exp	6	4	5
ANAN	2	121	exp	7	4	6
ANAN	3	120	exp	8	4	7
ANAN	4	98	exp	9	4	8
ANAN	5	71	exp	10	4	9
ANAN	6	102	exp	11	4	10
ANAN	7	94	exp	12	4	11
ANAN	8	149	exp	13	4	12
ANAN	9	113	exp	14	4	13
ANAS	0	141	first	5	4	4
ANAS	0	153	pros	4	4	3
ANAS	1	102	exp	6	4	5
ANAS	2	65	exp	7	4	6
ANAS	3	78	exp	8	4	7
ANAS	4	77	exp	9	4	8
ANAW	0	135	first	5	4	4
ANAW	0	146	pros	4	4	3
ANAW	0	147	pros	3	4	2
ANAW	1	130	exp	6	4	5
APAH	0	139	first	4	3	3
APAH	0	175	pros	3	3	2
APAH	1	134	exp	5	3	4
APAU	0	141	first	5	4	4
APAU	0	146	pros	4	4	3
APAU	0	166	pros	3	4	2
APAU	1	137	exp	6	4	5
APAU	2	118	exp	7	4	6
ARAH	0	144	first	6	5	5
ARAH	0	160	pros	4	5	3
ARAH	0	196	pros	3	5	2
ARAH	1	156	exp	7	5	6
ARAH	2	159	exp	8	5	7
ARAH	3	140	exp	9	5	8
ARAH	4	136	exp	10	5	9
ASAH	0	135	first	5	4	4
ASAH	0	149	pros	4	4	3
ASAH	0	182	pros	3	4	2
ASAH	1	130	exp	6	4	5
ASAH	2	128	exp	7	4	6
ASAH	3	120	exp	8	4	7
ASAH	4	147	exp	9	4	8
ASAH	5	146	exp	10	4	9
ASAH	6	129	exp	11	4	10
ASAH	7	115	exp	12	4	11
ASAH	7	135	exp	13	4	12
ASAH	8	134	exp	14	4	13
ASAP	0	149	first	4	3	3
ASAP	0	194	pros	3	3	2
ASAP	1	135	exp	5	3	4
ASAP	2	130	exp	6	3	5
ASAP	3	114	exp	7	3	6
ASAP	4	120	exp	8	3	7
ASAP	5	117	exp	9	3	8
ASAP	6	122	exp	10	3	9
ASAP	7	123	exp	11	3	10
ASAP	8	115	exp	12	3	11
ASAP	9	128	exp	13	3	12
ASAP	10	120	exp	14	3	13
ASAX	0	146	first	4	3	3
ASAX	0	182	pros	3	3	2
ASAX	1	137	exp	5	3	4
ASAX	1	137	exp	6	3	5
ASAX	2	135	exp	7	3	6
ASAX	3	139	exp	8	3	7
ASAX	4	131	exp	9	3	8
ASAX	5	125	exp	10	3	9
ASAX	6	109	exp	11	3	10
ASAX	7	114	exp	12	3	11
ASAX	8	146	exp	13	3	12
ASAX	9	134	exp	14	3	13
ASAY	0	137	first	6	5	5
ASAY	0	141	pros	5	5	4
ASAY	0	158	pros	4	5	3
ASAY	0	166	pros	3	5	2
ASAY	1	121	exp	7	5	6
ASAY	2	120	exp	8	5	7
ASAY	3	131	exp	9	5	8
ASAY	4	125	exp	10	5	9
ASAY	5	135	exp	11	5	10
ASAY	6	114	exp	12	5	11
ASAY	7	126	exp	13	5	12
AUAA	0	141	first	5	4	4
AUAA	0	149	pros	4	4	3
AUAA	0	206	pros	3	4	2
AUAA	1	137	exp	6	4	5
AUAA	2	127	exp	7	4	6
AUAA	3	127	exp	8	4	7
AUAP	0	141	first	5	4	4
AUAP	0	146	pros	4	4	3
AUAP	0	187	pros	3	4	2
AUAP	1	130	exp	6	4	5
AUAP	2	135	exp	7	4	6
AUAP	3	120	exp	8	4	7
AUAP	4	145	exp	9	4	8
AUAP	5	125	exp	10	4	9
AUAP	6	129	exp	11	4	10
AUAP	7	108	exp	12	4	11
AUAP	7	112	exp	13	4	12
AUAP	8	132	exp	14	4	13
AUAV	0	102	first	6	5	5
AUAV	0	129	pros	2	5	1
AUAV	0	137	pros	5	5	4
AUAV	0	177	pros	4	5	3
AUAV	1	107	exp	7	5	6
AUAV	2	120	exp	8	5	7
AUAV	3	105	exp	9	5	8
AUAV	4	97	exp	10	5	9
AUAV	5	100	exp	11	5	10
AUAV	6	94	exp	12	5	11
AWAF	0	145	first	5	4	4
AWAF	0	174	pros	4	4	3
AWAF	1	137	exp	6	4	5
AWAF	2	133	exp	7	4	6
AWAF	3	132	exp	8	4	7
AWAF	4	126	exp	9	4	8
AWAN	0	130	first	6	5	5
AWAN	0	141	pros	5	5	4
AWAN	0	207	pros	4	5	3
AWAN	1	127	exp	7	5	6
AWAN	2	125	exp	8	5	7
AWAN	3	117	exp	9	5	8
AWAR	0	139	first	4	3	3
AWAR	0	173	pros	3	3	2
AWAR	1	137	exp	5	3	4
AWAR	2	182	exp	8	3	7
AWAR	3	96	exp	9	3	8
AWAR	4	83	exp	10	3	9
AWAR	5	113	exp	11	3	10
AWAR	6	94	exp	12	3	11
AWAR	7	112	exp	13	3	12
AWAR	8	120	exp	14	3	13
AWAU	0	146	pros	4	4	3
AWAU	0	153	first	5	4	4
AWAU	0	166	pros	3	4	2
AWAU	1	137	exp	6	4	5
AWAU	2	134	exp	7	4	6
AWAU	3	173	exp	8	4	7
AXAG	0	139	first	4	3	3
AXAG	1	135	exp	5	3	4
AXAG	2	116	exp	6	3	5
AXAG	3	107	exp	7	3	6
AXAG	4	118	exp	8	3	7
BAAG	0	146	first	4	3	3
BAAG	0	192	pros	3	3	2
BAAG	1	137	exp	5	3	4
BAAG	2	130	exp	6	3	5
BAAG	3	121	exp	7	3	6
BAAK	0	137	first	5	4	4
BAAK	0	156	pros	4	4	3
BAAK	0	166	pros	3	4	2
BAAK	1	102	exp	6	4	5
BAAK	2	107	exp	7	4	6
BAAK	3	15	exp	8	4	7
BAAK	4	84	exp	9	4	8
BAAK	5	97	exp	10	4	9
BAAK	6	102	exp	11	4	10
BAAK	7	94	exp	12	4	11
BBAB	0	125	first	4	3	3
BBAB	1	116	exp	6	3	5
BBAB	1	141	exp	5	3	4
BBAB	2	100	exp	7	3	6
BBAB	3	97	exp	8	3	7
BBAB	4	96	exp	9	3	8
BBAB	5	116	exp	10	3	9
BBAF	0	153	first	5	4	4
BBAF	1	137	exp	6	4	5
BBAF	2	128	exp	7	4	6
BBAF	3	168	exp	8	4	7
BBAF	4	140	exp	9	4	8
BBAF	5	129	exp	10	4	9
BBAF	6	121	exp	11	4	10
BBAF	7	166	exp	12	4	11
BBAF	8	133	exp	13	4	12
BBAF	9	132	exp	14	4	13
BBAT	0	116	first	6	5	5
BBAT	0	141	pros	5	5	4
BBAT	0	167	pros	4	5	3
BBAT	1	121	exp	7	5	6
BBAT	2	99	exp	8	5	7
BBAT	3	145	exp	9	5	8
BBAT	4	104	exp	10	5	9
BBAX	1	123	exp	6	4	5
BBAX	2	111	exp	7	4	6
BBAX	3	141	exp	8	4	7
BBAX	4	112	exp	9	4	8
BBAX	5	102	exp	10	4	9
BBAX	6	116	exp	11	4	10
BBAX	7	86	exp	12	4	11
BBAX	8	114	exp	13	4	12
BBAY	0	142	first	6	5	5
BBAY	0	143	pros	5	5	4
BBAY	0	177	pros	4	5	3
BBAY	1	128	exp	7	5	6
BCAR	0	153	first	4	3	3
BCAR	0	216	pros	3	3	2
BDAN	0	123	first	6	5	5
BDAN	0	135	pros	5	5	4
BDAN	0	151	pros	4	5	3
BDAN	1	121	exp	7	5	6
BDAN	2	139	exp	8	5	7
BDAN	3	145	exp	9	5	8
BDAN	4	104	exp	10	5	9
BDAN	5	106	exp	11	5	10
BDAN	6	92	exp	12	5	11
BDAN	6	126	exp	13	5	12
BDAP	0	135	first	5	4	4
BDAP	0	140	pros	4	4	3
BDAP	0	185	pros	3	4	2
BDAP	1	123	exp	6	4	5
BDAP	2	107	exp	7	4	6
BDAP	3	132	exp	8	4	7
BDAU	0	123	first	6	5	5
BDAU	0	135	pros	5	5	4
BDAU	0	146	pros	4	5	3
BDAU	0	220	pros	3	5	2
BDAU	1	118	exp	7	5	6
BJAA	0	144	first	5	4	4
BJAA	0	173	pros	4	4	3
BJAA	0	203	pros	3	4	2
BJAA	1	130	exp	6	4	5
BJAA	2	128	exp	7	4	6
BJAA	3	120	exp	8	4	7
BJAA	4	147	exp	9	4	8
BJAA	5	167	exp	10	4	9
BJAA	6	113	exp	11	4	10
BJAA	7	114	exp	12	4	11
BJAA	8	126	exp	13	4	12
BJAA	9	132	exp	14	4	13
BJAZ	0	130	first	6	5	5
BJAZ	0	149	pros	4	5	3
BJAZ	0	182	pros	3	5	2
BJAZ	1	121	exp	7	5	6
BJAZ	2	120	exp	8	5	7
BJAZ	3	145	exp	9	5	8
BJAZ	4	137	exp	10	5	9
BKAA	0	149	first	4	3	3
BKAA	0	194	pros	3	3	2
BKAA	1	137	exp	5	3	4
BKAN	0	137	first	5	4	4
BKAN	0	165	pros	4	4	3
BKAN	1	123	exp	6	4	5
BKAX	0	151	first	4	3	3
BKAX	0	192	pros	3	3	2
BKAX	1	141	exp	5	3	4
BKAX	2	127	exp	6	3	5
BKAX	3	114	exp	7	3	6
BLAD	0	137	first	5	4	4
BLAD	0	149	pros	4	4	3
BLAD	0	216	pros	3	4	2
BLAD	1	116	exp	6	4	5
BLAD	2	135	exp	7	4	6
BLAD	3	120	exp	8	4	7
BLAD	4	125	exp	9	4	8
BLAD	5	109	exp	10	4	9
BLAD	6	109	exp	11	4	10
BLAD	7	114	exp	12	4	11
BLAD	7	128	exp	13	4	12
BLAD	8	120	exp	14	4	13
BLAH	0	141	first	5	4	4
BLAH	0	161	pros	4	4	3
BLAH	0	178	pros	3	4	2
BLAH	1	156	exp	6	4	5
BLAH	2	121	exp	7	4	6
BLAH	3	120	exp	8	4	7
BLAH	4	126	exp	9	4	8
BLAH	5	111	exp	10	4	9
BLAH	6	116	exp	11	4	10
BLAN	0	156	first	7	6	6
BLAN	0	167	pros	4	6	3
BLAN	0	201	pros	3	6	2
BLAR	0	143	first	5	4	4
BLAR	0	165	pros	4	4	3
BLAR	1	149	exp	6	4	5
BLAR	2	134	exp	7	4	6
BLAR	3	139	exp	8	4	7
BLAR	4	138	exp	9	4	8
BLAR	5	125	exp	10	4	9
BLAR	6	135	exp	11	4	10
BLAR	7	122	exp	12	4	11
BLAR	8	125	exp	13	4	12
BLAR	9	120	exp	14	4	13
BMAA	0	125	first	4	3	3
BMAA	1	135	exp	5	3	4
BMAA	2	130	exp	6	3	5
BMAN	0	137	first	6	5	5
BMAN	0	137	pros	5	5	4
BMAN	0	205	pros	4	5	3
BMAN	1	121	exp	7	5	6
BMAN	2	132	exp	8	5	7
BMAN	3	138	exp	9	5	8
BMAN	4	123	exp	10	5	9
BMAN	5	116	exp	11	5	10
BMAN	6	120	exp	12	5	11
BMAN	7	128	exp	13	5	12
BMAN	8	127	exp	14	5	13
BMAT	0	144	first	5	4	4
BMAT	0	192	pros	3	4	2
BMAT	1	125	exp	7	4	6
BMAT	1	149	exp	6	4	5
BMAT	2	125	exp	8	4	7
BMAT	3	105	exp	9	4	8
BNAC	0	146	first	4	3	3
BNAC	0	196	pros	3	3	2
BNAC	1	141	exp	5	3	4
BNAC	2	116	exp	6	3	5
BNAC	3	111	exp	7	3	6
BNAC	4	104	exp	8	3	7
BNAC	5	98	exp	9	3	8
BNAH	0	144	first	5	4	4
BNAH	0	178	pros	4	4	3
BNAH	0	194	pros	3	4	2
BNAH	1	130	exp	6	4	5
BNAH	2	121	exp	7	4	6
BNAH	3	160	exp	8	4	7
BNAH	4	167	exp	9	4	8
BNAH	5	153	exp	10	4	9
BNAH	6	163	exp	11	4	10
BNAH	7	182	exp	13	4	12
BNAH	8	182	exp	14	4	13
BNAR	0	137	first	5	4	4
BNAR	0	186	pros	4	4	3
BNAR	0	187	pros	3	4	2
BNAR	1	123	exp	6	4	5
BNAR	2	121	exp	7	4	6
BNAR	3	155	exp	8	4	7
BNAR	4	131	exp	9	4	8
BNAR	5	136	exp	10	4	9
BNAT	0	146	first	4	3	3
BNAT	0	166	pros	3	3	2
BNAT	1	137	exp	5	3	4
BNAT	2	130	exp	6	3	5
BPAL	0	137	first	5	4	4
BPAL	0	146	pros	4	4	3
BPAL	0	164	pros	3	4	2
BPAL	1	149	exp	6	4	5
BPAL	2	134	exp	7	4	6
BPAZ	0	144	first	4	3	3
BPAZ	1	141	exp	5	3	4
BPAZ	1	142	exp	6	3	5
BSAL	0	144	first	6	5	5
BSAL	0	144	pros	5	5	4
BSAL	0	156	pros	4	5	3
BSAL	0	168	pros	3	5	2
BSAL	1	114	exp	7	5	6
BSAL	2	106	exp	8	5	7
BSAL	3	98	exp	9	5	8
BSAL	4	132	exp	10	5	9
BSAL	5	113	exp	11	5	10
BSAL	6	66	exp	12	5	11
BSAL	7	105	exp	13	5	12
BSAL	8	127	exp	14	5	13
BSAT	0	135	first	5	4	4
BSAT	0	170	pros	2	4	1
BSAT	0	179	pros	4	4	3
BSAT	1	130	exp	6	4	5
BSAT	2	125	exp	7	4	6
BSAT	3	120	exp	8	4	7
BSAT	4	126	exp	9	4	8
BSAT	5	118	exp	10	4	9
BSAT	6	186	exp	11	4	10
BSAT	7	127	exp	12	4	11
BSAW	0	137	first	5	4	4
BSAW	0	149	pros	4	4	3
BSAW	1	191	exp	6	4	5
BSAW	2	114	exp	7	4	6
BSAW	3	131	exp	8	4	7
BSAW	4	98	exp	9	4	8
BSAY	0	137	first	5	4	4
BSAY	0	149	pros	4	4	3
BSAY	1	116	exp	6	4	5
BSAY	2	107	exp	7	4	6
BSAY	3	120	exp	8	4	7
BSAY	4	105	exp	9	4	8
BSAY	5	102	exp	10	4	9
BSAY	6	113	exp	11	4	10
BSAY	7	115	exp	12	4	11
BSAY	8	142	exp	13	4	12
BSAY	9	141	exp	14	4	13
BTAF	0	134	first	5	4	4
BTAF	0	153	pros	4	4	3
BTAF	1	142	exp	6	4	5
BTAF	2	125	exp	7	4	6
BTAF	2	131	exp	8	4	7
BTAF	3	125	exp	9	4	8
BTAF	4	125	exp	10	4	9
BTAF	5	123	exp	11	4	10
BTAF	6	122	exp	12	4	11
BTAF	7	121	exp	13	4	12
BTAF	8	120	exp	14	4	13
BTAG	0	153	pros	4	5	3
BTAG	0	171	pros	3	5	2
BTAG	1	142	exp	7	5	6
BTAG	2	120	exp	8	5	7
BTAG	3	126	exp	9	5	8
BTAG	3	127	exp	12	5	11
BTAG	3	156	exp	13	5	12
BTAG	4	155	exp	14	5	13
BTAX	0	137	first	5	4	4
BTAX	0	160	pros	4	4	3
BTAX	1	137	exp	6	4	5
BTAX	2	121	exp	7	4	6
BTAX	3	120	exp	8	4	7
BTAX	4	133	exp	9	4	8
BTAX	5	118	exp	10	4	9
BTAX	6	113	exp	11	4	10
BTAX	7	108	exp	12	4	11
BTAX	8	128	exp	13	4	12
BTAX	9	113	exp	14	4	13
DFAF	0	126	first	12	4	4
DFAF	0	213	pros	11	4	3
DFAF	1	126	exp	13	4	5
DFAF	2	125	exp	14	4	6
DFAP	0	149	first	12	4	4
DFAP	1	155	exp	13	4	5
DFAP	2	195	exp	14	4	6
DLAV	0	157	first	12	4	4
DLAV	0	175	pros	11	4	3
DMAC	0	92	pros	12	5	4
DMAC	0	115	pros	10	5	2
DMAC	0	119	first	13	5	5
DMAC	0	220	pros	11	5	3
DMAJ	0	126	first	13	5	5
DMAJ	0	126	pros	12	5	4
DMAJ	0	141	pros	11	5	3
DMAU	0	128	first	13	5	5
DMAU	0	143	pros	11	5	3
DMAU	1	134	exp	14	5	6
DMAW	0	156	first	11	3	3
DMAW	1	157	exp	12	3	4
DMAW	2	135	exp	13	3	5
DMAW	3	155	exp	14	3	6
DNAU	0	114	first	13	5	5
DNAU	0	219	pros	11	5	3
DNAU	1	113	exp	14	5	6
DPAD	0	126	first	13	5	5
DPAD	1	111	exp	14	5	6
DPAK	0	156	first	13	5	5
DPAK	0	205	pros	11	5	3
DPAK	1	194	exp	14	5	6
DPAM	0	143	first	11	3	3
DPAM	0	153	pros	10	3	2
DPAM	1	115	exp	12	3	4
DPAZ	0	120	first	12	4	4
DPAZ	0	175	pros	11	4	3
DPAZ	1	128	exp	13	4	5
DPAZ	2	120	exp	14	4	6
DRAR	0	160	first	12	4	4
DRAR	1	147	exp	13	4	5
DRAR	2	153	exp	14	4	6
DRAZ	0	200	first	11	3	3
DRAZ	1	135	exp	13	3	5
DRAZ	1	141	exp	12	3	4
DSAJ	0	121	first	11	3	3
DSAJ	0	123	pros	10	3	2
DSAJ	1	106	exp	12	3	4
DSAJ	1	112	exp	13	3	5
DSAJ	2	83	exp	14	3	6
DTAG	1	126	exp	13	3	5
DTAG	1	129	exp	12	3	4
DTAG	2	151	exp	14	3	6
DUAB	0	66	first	12	4	4
DUAB	0	127	pros	11	4	3
DUAB	1	105	exp	13	4	5
DUAB	2	104	exp	14	4	6
DUAD	0	183	first	12	4	4
DUAD	0	214	pros	10	4	2
DUAD	1	147	exp	13	4	5
DUAY	0	133	first	12	4	4
DUAY	1	119	exp	13	4	5
DUAY	2	132	exp	14	4	6
DVAJ	0	143	first	11	3	3
DVAJ	0	158	pros	10	3	2
DVAJ	1	182	exp	12	3	4
DVAJ	2	128	exp	13	3	5
DVAJ	3	152	exp	14	3	6
DVAL	0	160	first	14	6	6
DVAP	0	121	first	13	5	5
DVAP	0	134	pros	12	5	4
DVAP	0	149	pros	11	5	3
DVAP	1	104	exp	14	5	6
DVAU	0	115	first	12	4	4
DVAU	0	123	pros	11	4	3
DVAU	0	167	pros	10	4	2
DVAU	1	128	exp	13	4	5
DVAU	2	104	exp	14	4	6
DVAY	0	120	pros	12	5	4
DVAY	0	143	pros	11	5	3
DVAY	0	156	first	13	5	5
DVAY	0	193	pros	10	5	2
DVAY	1	127	exp	14	5	6
DWAJ	0	115	first	12	4	4
DWAJ	0	123	pros	11	4	3
DWAJ	0	153	pros	10	4	2
DWAJ	0	194	pros	9	4	1
DWAJ	1	142	exp	13	4	5
DWAJ	2	141	exp	14	4	6
DWAR	0	120	pros	12	5	4
DWAR	0	121	first	13	5	5
DWAR	0	149	pros	11	5	3
DWAS	0	135	first	13	5	5
DWAS	1	134	exp	14	5	6
DWAY	0	147	first	13	5	5
DWAY	0	175	pros	11	5	3
DWAY	1	151	exp	14	5	6
DXAS	0	137	first	11	3	3
DXAS	1	183	exp	12	3	4
DXAT	0	135	first	13	5	5
DXAT	1	148	exp	14	5	6
DXAU	0	143	first	11	3	3
DXAU	0	173	pros	10	3	2
DXAU	1	120	exp	12	3	4
DXAU	2	142	exp	13	3	5
DXAU	3	134	exp	14	3	6
DXAX	0	149	first	11	3	3
DXAX	1	129	exp	12	3	4
DXAX	1	140	exp	13	3	5
DXAX	2	125	exp	14	3	6
DYAC	0	121	first	12	4	4
DYAC	1	133	exp	13	4	5
DYAC	2	125	exp	14	4	6
DYAG	0	163	pros	11	4	3
DYAG	0	183	first	12	4	4
DYAG	1	126	exp	13	4	5
DYAG	2	104	exp	14	4	6
DYAR	0	153	first	12	4	4
DYAR	1	126	exp	13	4	5
DYAR	2	146	exp	14	4	6
DZAK	0	112	first	13	5	5
DZAM	0	162	first	13	5	5
DZAM	0	193	pros	11	5	3
DZAM	1	134	exp	14	5	6
DZAX	0	129	first	12	4	4
DZAX	0	171	pros	11	4	3
DZAX	1	128	exp	13	4	5
DZAX	2	113	exp	14	4	6
E089	1	142	exp	7	4	6
E089	2	141	exp	8	4	7
E089	3	138	exp	9	4	8
E089	4	118	exp	10	4	9
E089	5	123	exp	11	4	10
E089	7	135	exp	13	4	12
E089	8	127	exp	14	4	13
E373	0	125	pros	7	6	5
E373	0	148	first	8	6	6
E373	1	182	exp	9	6	7
E373	2	125	exp	10	6	8
E373	3	129	exp	11	6	9
E523	0	167	first	10	7	7
E523	1	143	exp	11	7	8
E523	2	127	exp	12	7	9
E523	2	140	exp	13	7	10
E523	3	125	exp	14	7	11
E720	0	127	first	7	4	4
E720	0	144	pros	6	4	3
E720	1	139	exp	8	4	5
E720	2	131	exp	9	4	6
E720	3	132	exp	10	4	7
E720	4	123	exp	11	4	8
E720	5	122	exp	12	4	9
E720	6	121	exp	13	4	10
E720	7	113	exp	14	4	11
EA91	0	193	first	4	6	6
EA91	1	116	exp	6	6	8
EA91	1	143	exp	5	6	7
EA91	2	114	exp	7	6	9
EA91	3	104	exp	8	6	10
EA91	4	152	exp	9	6	11
EA91	5	116	exp	10	6	12
EA91	6	106	exp	11	6	13
EL52	0	114	first	2	4	4
EL52	1	147	exp	3	4	5
EL52	2	111	exp	4	4	6
EL52	3	102	exp	6	4	8
EL52	3	141	exp	5	4	7
EL52	4	133	exp	7	4	9
EL52	5	92	exp	8	4	10
EL52	6	103	exp	9	4	11
EL52	7	123	exp	10	4	12
EL52	8	92	exp	11	4	13
ES51	0	126	first	3	5	5
ES51	0	129	pros	1	5	3
ES51	0	149	pros	2	5	4
ES51	1	69	exp	4	5	6
ES51	2	54	exp	5	5	7
ES51	2	102	exp	6	5	8
ES51	3	63	exp	9	5	11
ES51	3	81	exp	11	5	13
ES51	3	134	exp	7	5	9
ES51	3	141	exp	8	5	10
ET54	0	119	first	3	5	5
ET54	1	144	exp	4	5	6
ET54	2	147	exp	7	5	9
ET54	4	168	exp	9	5	11
ET54	5	185	exp	10	5	12
ET54	6	116	exp	11	5	13
EU83	2	127	exp	8	7	9
EU83	3	147	exp	9	7	10
EU83	4	116	exp	10	7	11
EU83	5	135	exp	11	7	12
EU83	6	107	exp	12	7	13
GDAP	0	170	first	13	4	4
GDAP	1	134	exp	14	4	5
GDAX	0	135	first	13	4	4
GDAX	0	200	pros	11	4	2
GDAX	1	113	exp	14	4	5
GGAC	0	126	first	13	4	4
GGAC	1	146	exp	14	4	5
GGAV	0	121	pros	12	4	3
GGAV	0	126	first	13	4	4
GGAV	0	213	pros	11	4	2
GGAV	1	132	exp	14	4	5
GJAT	0	158	first	11	3	3
GJAT	1	140	exp	13	3	5
GJAT	2	132	exp	14	3	6
GKAB	0	143	pros	11	5	3
GKAB	0	156	first	13	5	5
GKAB	1	120	exp	14	5	6
GKAV	0	121	first	13	5	5
GKAV	1	146	exp	14	5	6
GLAC	0	151	pros	11	4	3
GLAC	0	183	first	12	4	4
GLAC	1	149	exp	13	4	5
GLAC	2	120	exp	14	4	6
GNAG	0	133	first	13	4	4
GNAG	0	149	pros	12	4	3
GNAG	1	125	exp	14	4	5
GNAR	0	128	first	13	4	4
GNAR	0	141	pros	12	4	3
GNAR	1	120	exp	14	4	5
GNAU	0	156	first	13	4	4
GNAU	1	141	exp	14	4	5
GPAD	0	143	pros	12	4	3
GPAD	0	161	first	13	4	4
GPAD	1	146	exp	14	4	5
GPAR	0	126	first	13	4	4
GPAR	0	142	pros	12	4	3
GPAR	1	132	exp	14	4	5
GRAC	0	140	first	13	4	4
GRAS	0	154	first	13	4	4
GRAS	1	118	exp	14	4	5
GSAN	0	121	first	13	4	4
GSAN	1	118	exp	14	4	5
GSAW	0	140	first	13	4	4
GSAW	0	160	pros	12	4	3
GSAW	1	132	exp	14	4	5
GSAY	0	160	first	13	4	4
GSAY	0	166	pros	12	4	3
GSAY	1	146	exp	14	4	5
GTAJ	0	133	first	13	4	4
GTAJ	1	148	exp	14	4	5
GTAK	0	126	first	13	4	4
GTAK	0	156	pros	12	4	3
GTAK	1	146	exp	14	4	5
HAAJ	0	133	first	13	3	3
HAAJ	1	160	exp	14	3	4
HAAP	0	140	pros	13	4	3
HAAP	0	146	first	14	4	4
HCAP	0	121	pros	13	4	3
HCAP	0	183	first	14	4	4
HCAR	0	142	pros	13	4	3
HCAR	0	148	first	14	4	4
HCAT	0	148	first	14	4	4
HCAT	0	156	pros	13	4	3
HCAT	0	172	pros	11	4	1
HCAU	0	159	first	14	4	4
HCAU	0	183	pros	13	4	3
HDAG	0	139	first	14	4	4
HFAA	0	146	first	14	4	4
HFAA	0	162	pros	13	4	3
HFAR	0	140	pros	13	4	3
HFAR	0	146	first	14	4	4
HGAU	0	146	first	14	4	4
HGAU	0	162	pros	13	4	3
HHAD	0	133	first	13	3	3
HJAB	0	155	first	14	4	4
HJAM	0	140	first	13	3	3
HJAM	1	139	exp	14	3	4
HKAH	0	126	pros	13	4	3
HKAH	0	152	first	14	4	4
HKAP	0	139	first	14	4	4
HKAP	0	140	pros	13	4	3
HKAT	0	147	pros	13	4	3
HKAT	0	151	first	14	4	4
HKAX	0	132	first	14	4	4
HKAX	0	161	pros	12	4	2
HKAX	0	161	pros	13	4	3
HLAP	0	156	pros	13	4	3
HLAP	0	187	first	14	4	4
HLAU	0	146	first	14	4	4
HMAL	0	196	first	14	4	4
HMAT	0	153	first	13	3	3
HNAF	0	154	first	13	3	3
HNAF	1	132	exp	14	3	4
HNAG	0	134	first	14	4	4
HNAG	0	142	pros	13	4	3
HNAT	0	177	first	13	3	3
HNAT	1	148	exp	14	3	4
HPAJ	0	128	first	13	3	3
HPAJ	1	120	exp	14	3	4
HRAA	0	149	first	13	3	3
HRAA	1	141	exp	14	3	4
HRAS	0	178	pros	13	4	3
HSAJ	0	134	first	14	4	4
HSAL	0	141	first	14	4	4
HSAL	0	176	pros	13	4	3
HSAN	0	140	first	13	3	3
HSAN	1	125	exp	14	3	4
HSAZ	0	154	pros	13	4	3
HSAZ	0	155	first	14	4	4
HTAS	0	132	first	14	4	4
HTAS	0	168	pros	13	4	3
HUAF	0	134	first	14	4	4
HUAF	0	146	pros	13	4	3
HYAR	0	120	first	14	4	4
HYAR	0	140	pros	13	4	3
HZAB	0	146	first	13	3	3
HZAB	1	111	exp	14	3	4
HZAD	0	119	pros	13	4	3
HZAD	0	120	first	14	4	4
HZAK	0	104	first	14	4	4
HZAS	0	114	pros	13	4	3
HZAS	0	141	pros	12	4	2
HZAS	0	148	first	14	4	4
HZAV	0	146	pros	13	4	3
HZAV	0	166	first	14	4	4
KJAJ	0	148	first	14	4	4
KJAZ	0	120	first	14	4	4
KJAZ	0	177	pros	13	4	3
LPAJ	0	141	first	14	3	3
LPAJ	0	182	pros	13	3	2
LPAV	0	148	first	14	3	3
LPAV	0	217	pros	13	3	2
LRAC	0	139	first	14	3	3
LSAS	0	128	pros	13	3	2
LSAS	0	134	first	14	3	3
PE5	0	167	first	4	5	5
PE5	1	134	exp	7	5	8
PE5	2	111	exp	8	5	9
PE5	3	152	exp	9	5	10
PE5	4	129	exp	10	5	11
PE5	5	100	exp	11	5	12
PE5	6	121	exp	12	5	13
PH0	2	183	exp	6	4	7
PH0	3	140	exp	7	4	8
PH0	4	141	exp	8	4	9
RT0	1	154	exp	7	7	8
RT0	2	120	exp	8	7	9
RT0	3	147	exp	9	7	10
RT0	4	130	exp	10	7	11
RT0	5	121	exp	11	7	12
THV	0	158	first	9	4	4
THV	1	108	exp	12	4	7
THV	2	156	exp	13	4	8
THV	3	113	exp	14	4	9
TU9	0	144	pros	4	6	4
TU9	0	217	pros	3	6	3
TU9	1	154	exp	7	6	7
TU9	2	141	exp	8	6	8
TU9	3	103	exp	9	6	9
TU9	4	116	exp	10	6	10
TU9	5	100	exp	11	6	11
TU9	6	101	exp	12	6	12
TU9	7	133	exp	13	6	13

[truncated: 2 more sheets: cox regression, Mark analysis]
